# Supplementary material
Source: PubMed Central journal article supplement (PMC7870562)
Supplement: NIHMS1658500-supplement-1.pdf [file NIHMS1658500-supplement-1.pdf]

## NMR and HRMS Spectra

**3-Hydroxy-2-phenyl-4H-chromen-4-one (F1):**  $^1\text{H-NMR}$  (400 MHz,  $\text{CDCl}_3$ ):

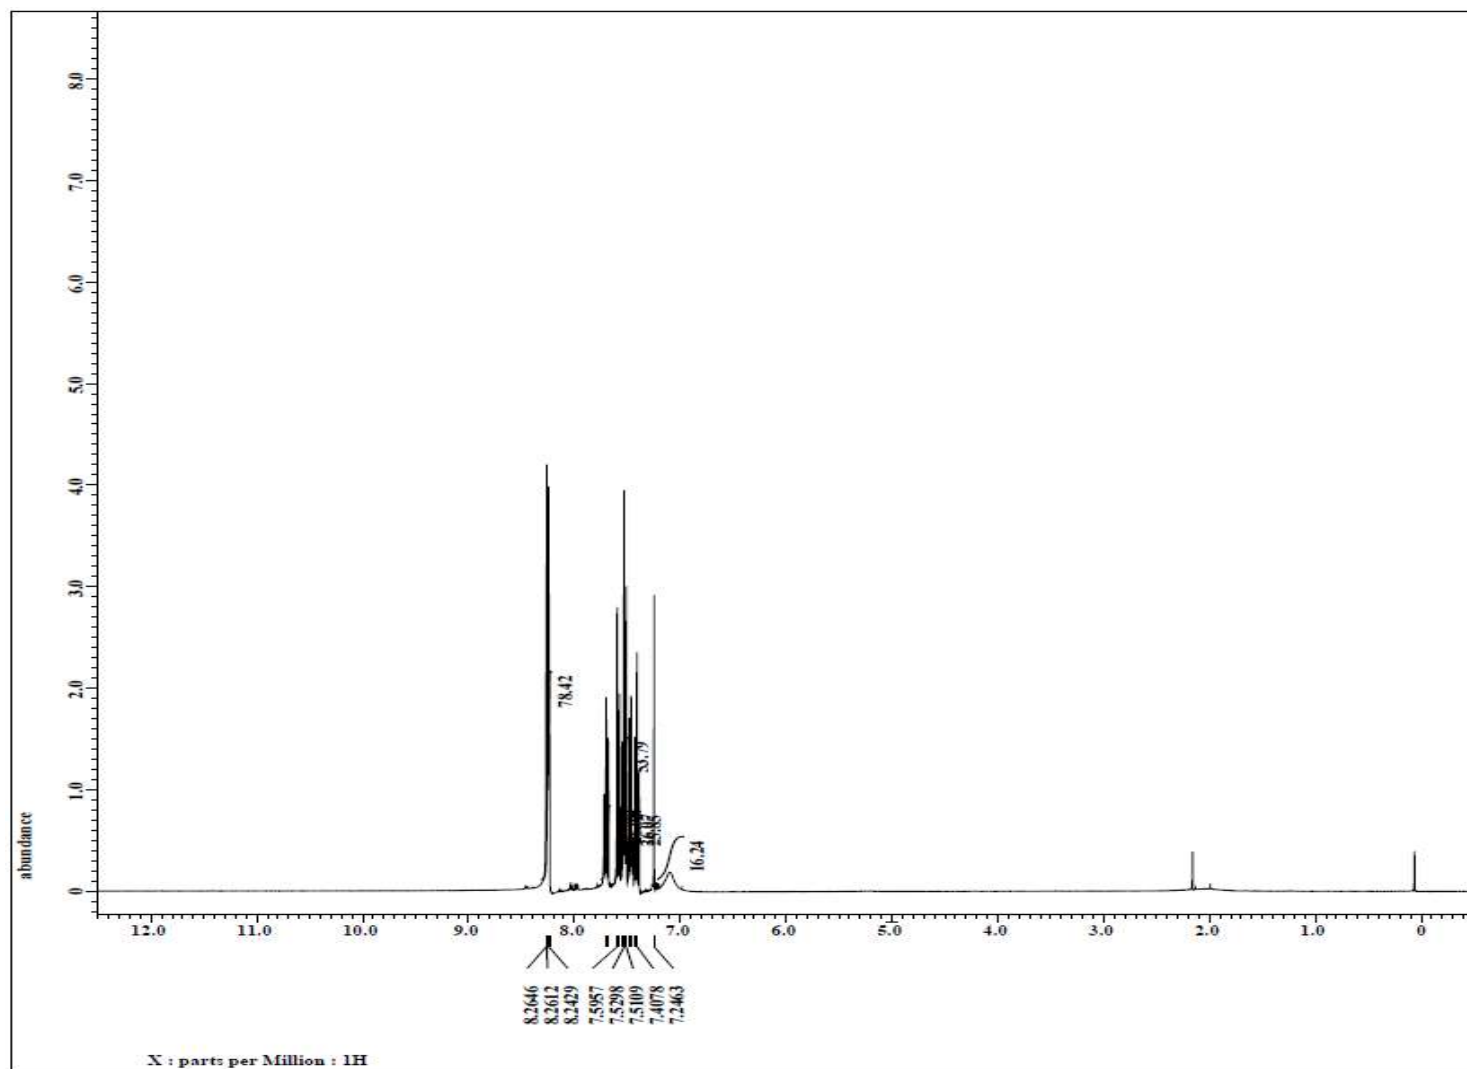

3-Hydroxy-2-phenyl-4H-chromen-4-one (F1):  $^{13}\text{C}$ -NMR (100 MHz;  $\text{CDCl}_3$ )

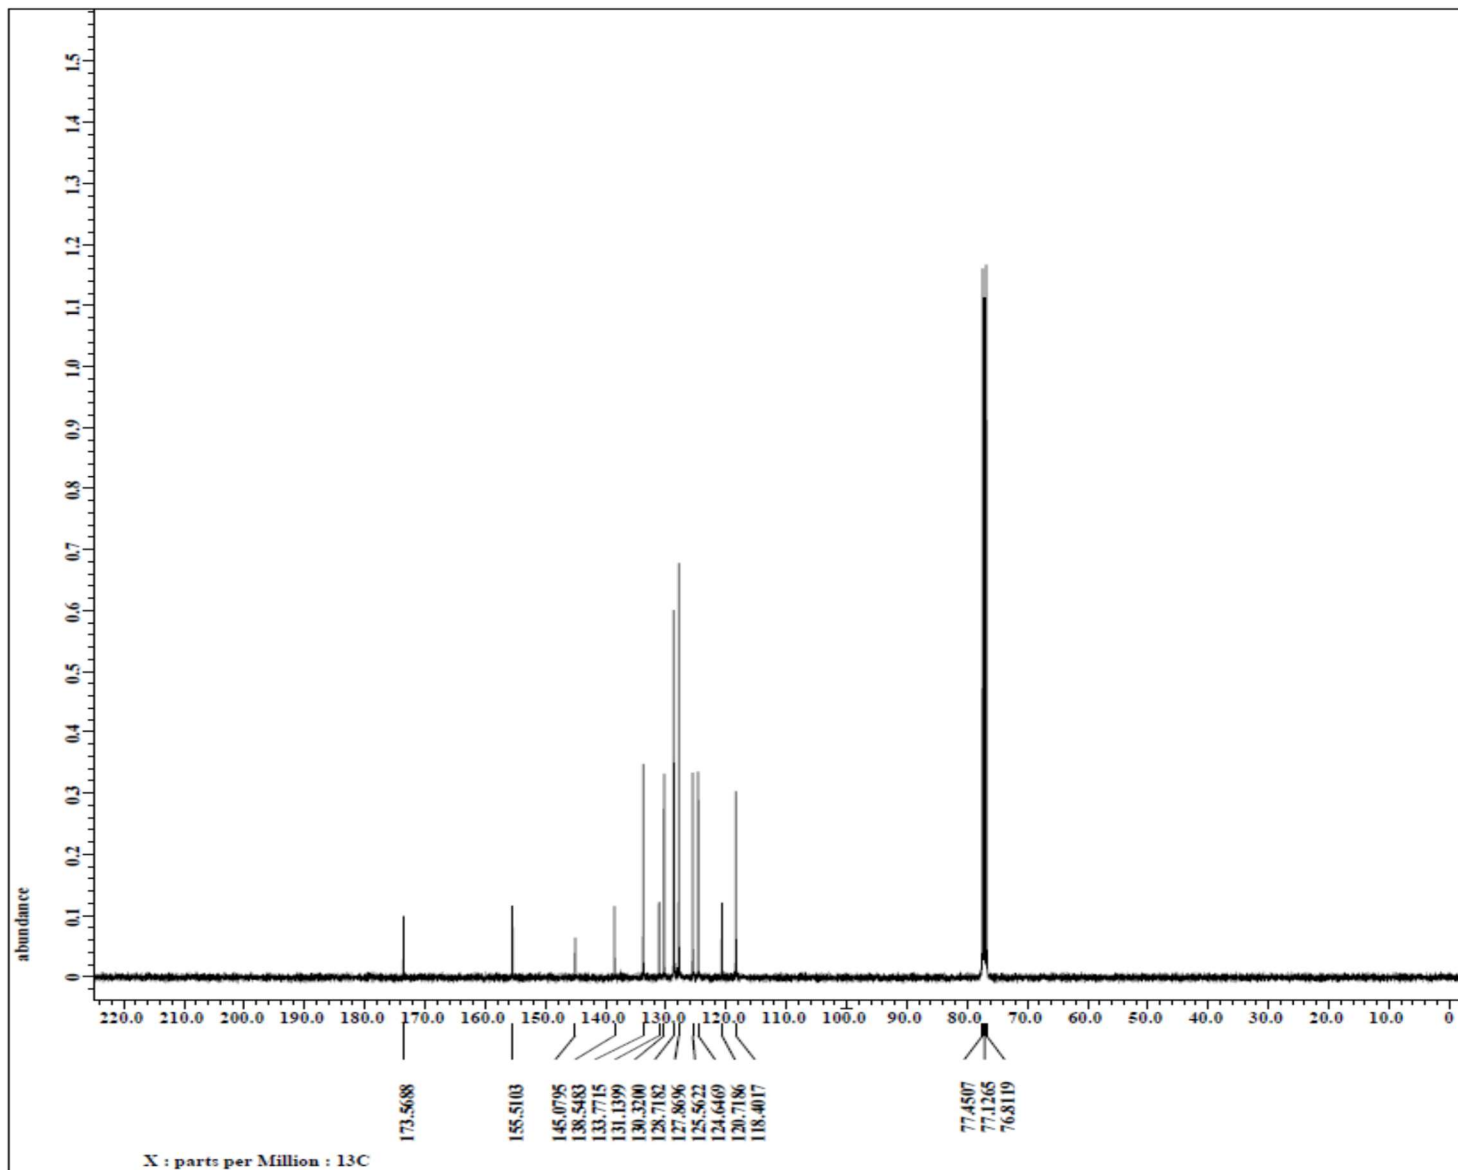

### 3-Hydroxy-2-phenyl-4H-chromen-4-one (F1): HRMS (ESI)

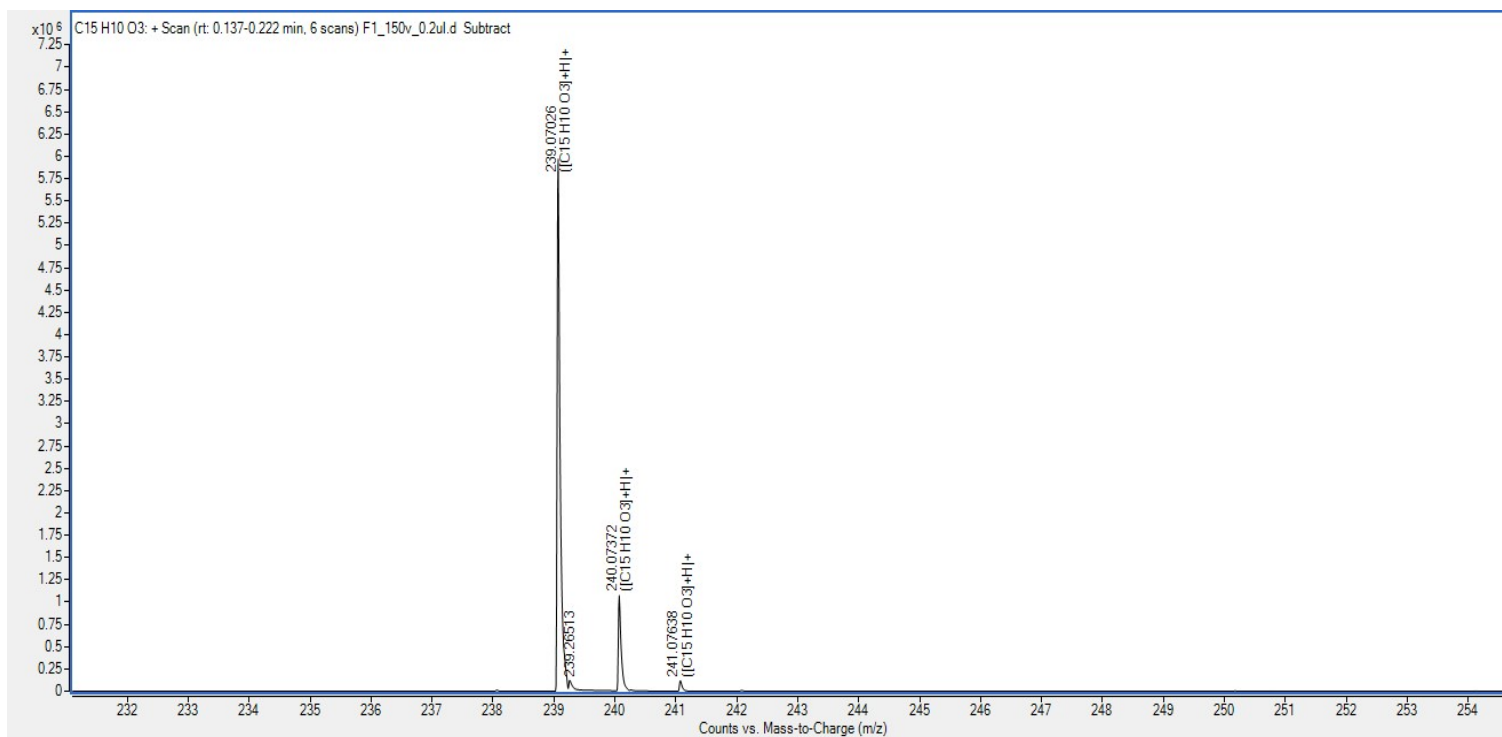

Species, Calc m/z

M+, 238.06245

(M+H)+, 239.07027

(M+Na)+, 261.05222

(M+K)+, 277.02615

| Formula                                        | Species            | m/z       | Score | Diff (abs. ppm) | Mass      |
|------------------------------------------------|--------------------|-----------|-------|-----------------|-----------|
| C <sub>15</sub> H <sub>10</sub> O <sub>3</sub> | (M+H) <sup>+</sup> | 239.07026 | 99.4  | 0               | 238.06299 |

**3-Hydroxy-2-(3-methoxyphenyl)-4H-chromen-4-one (F2): <sup>1</sup>H-NMR (400 MHz, CDCl<sub>3</sub>):**

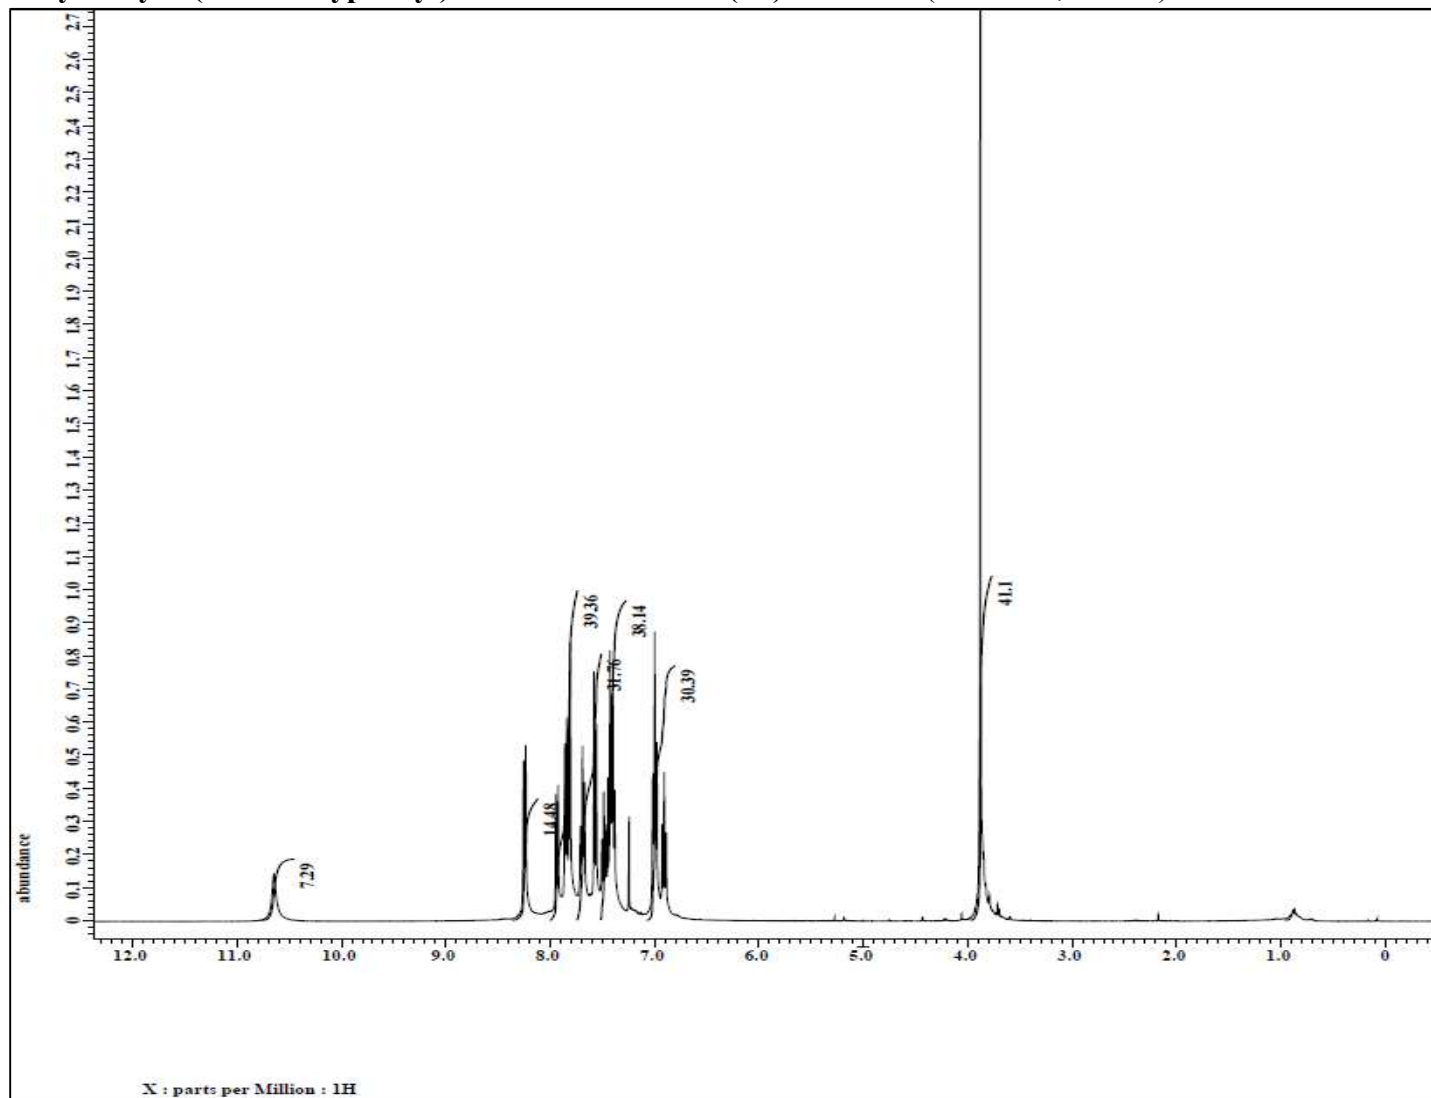

3-Hydroxy-2-(3-methoxyphenyl)-4H-chromen-4-one (F2):  $^{13}\text{C}$ -NMR (100 MHz;  $\text{CDCl}_3$ )

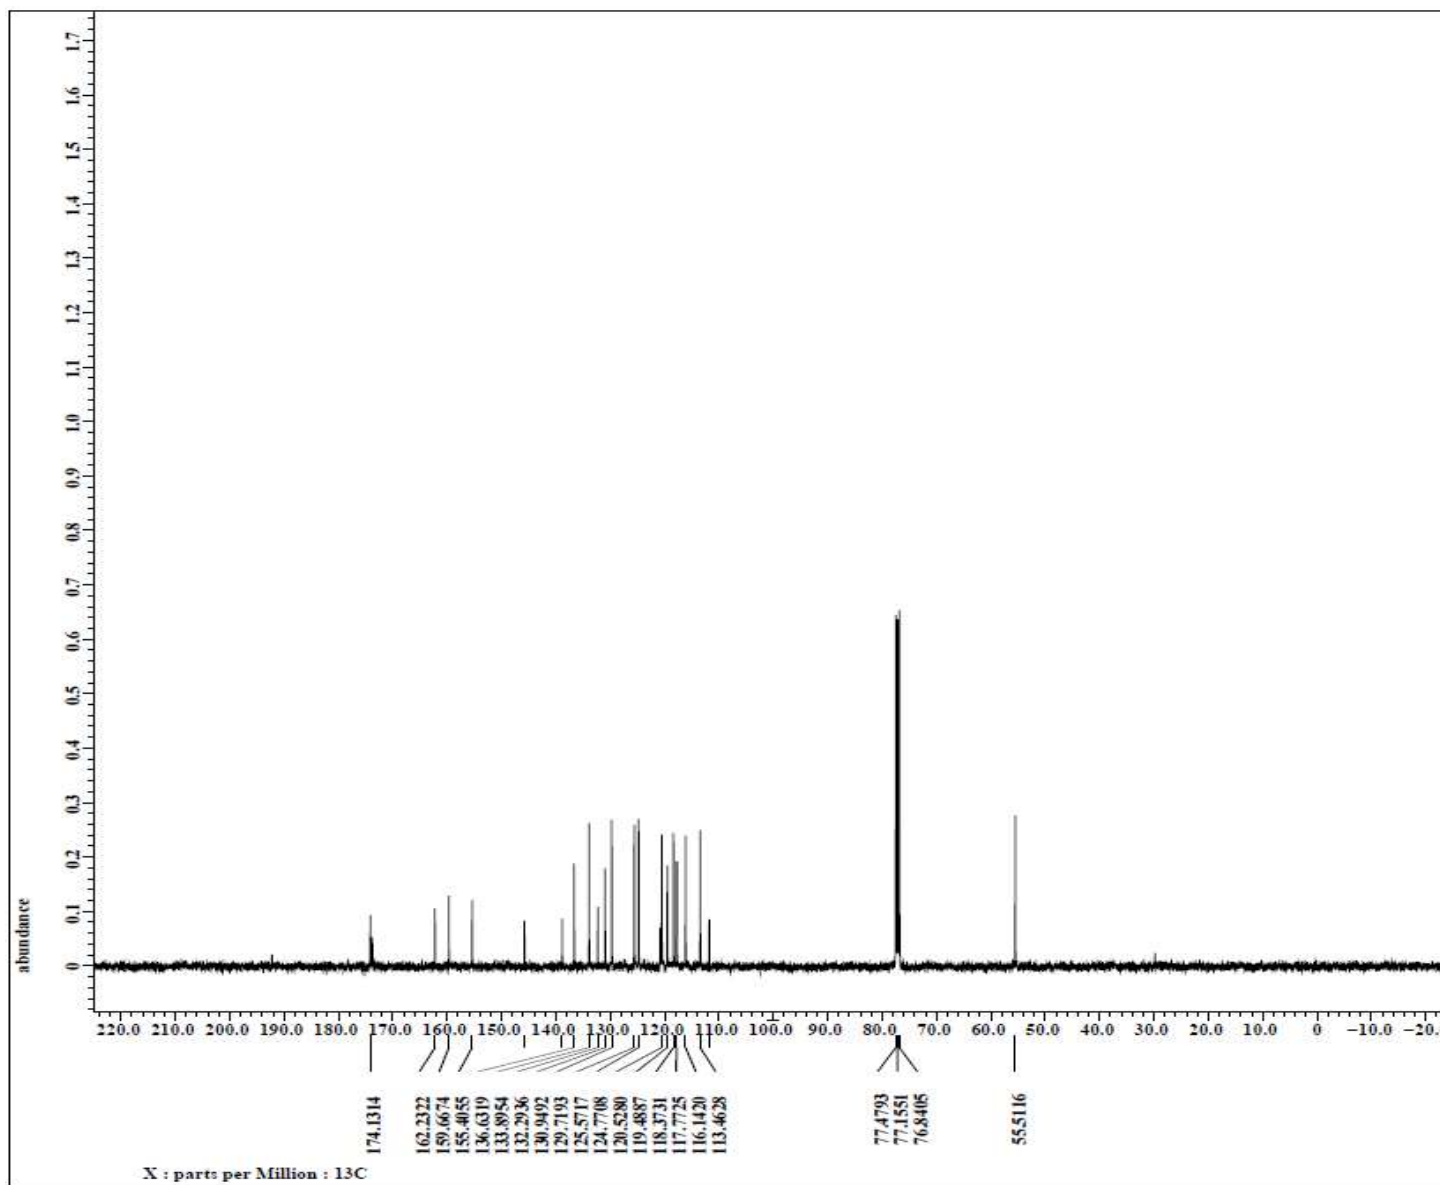

### 3-Hydroxy-2-(3-methoxyphenyl)-4H-chromen-4-one (F2): HRMS (ESI)

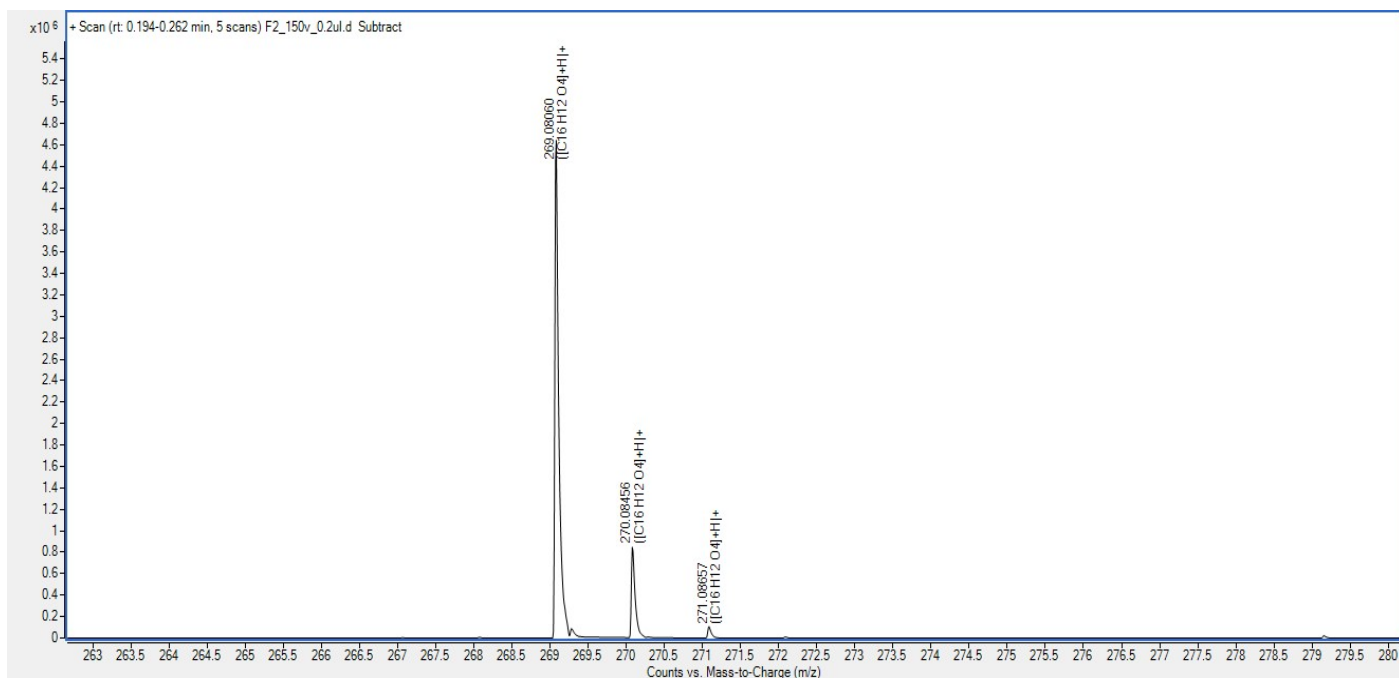

| Species, | Calc m/z  | Formula,                                         | Species,       | m/z,              | Score, | Diff (abs. ppm), | Mass      |
|----------|-----------|--------------------------------------------------|----------------|-------------------|--------|------------------|-----------|
| M+,      | 268.07301 |                                                  |                |                   |        |                  |           |
| (M+H)+,  | 269.08084 | C <sub>16</sub> H <sub>12</sub> O <sub>4</sub> , | <b>(M+H)+,</b> | <b>269.08060,</b> | 99.17, | 0.54,            | 268.07356 |
| (M+Na)+, | 291.06278 |                                                  |                |                   |        |                  |           |
| (M+K)+,  | 307.03672 |                                                  |                |                   |        |                  |           |

3-Hydroxy-2-(4-((trifluoromethyl)thio)phenyl)-4H-chromen-4-one (F3):  $^1\text{H-NMR}$  (400 MHz,  $\text{CDCl}_3$ ):

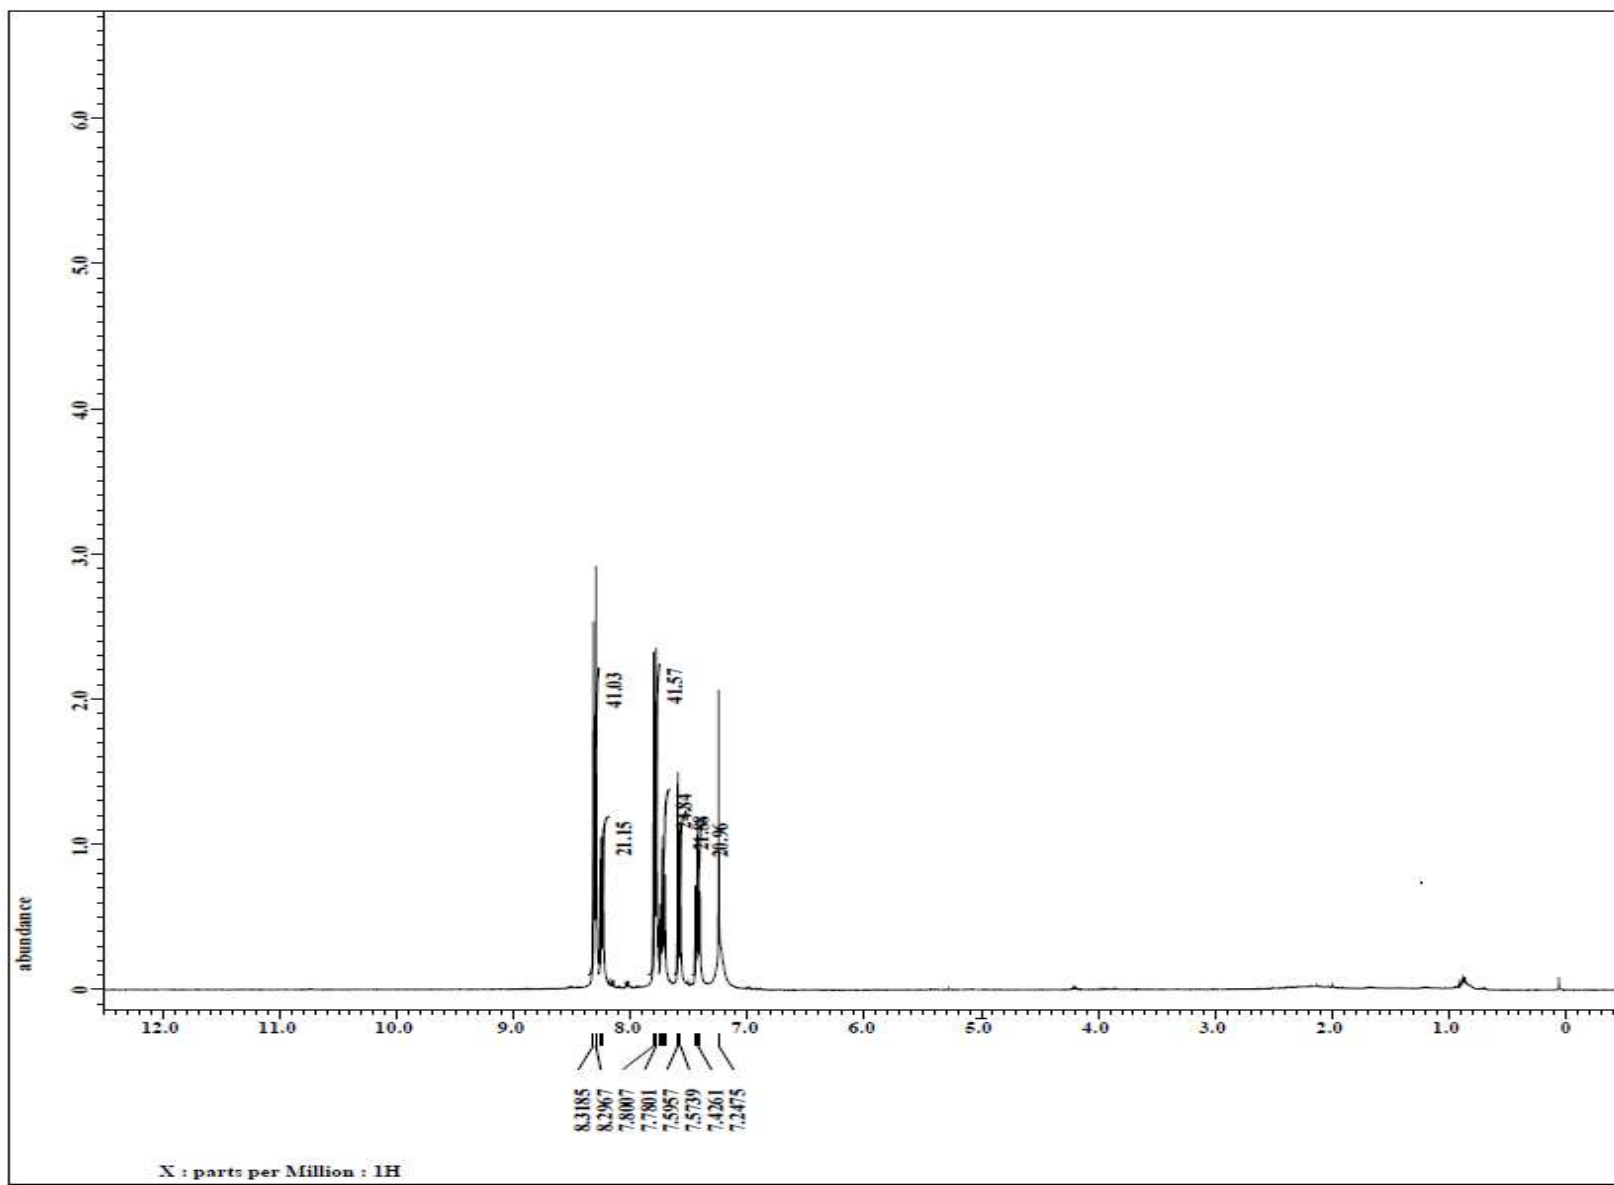

3-Hydroxy-2-(4-((trifluoromethyl)thio)phenyl)-4H-chromen-4-one (F3):  $^{13}\text{C}$ -NMR (100 MHz;  $\text{CDCl}_3$ )

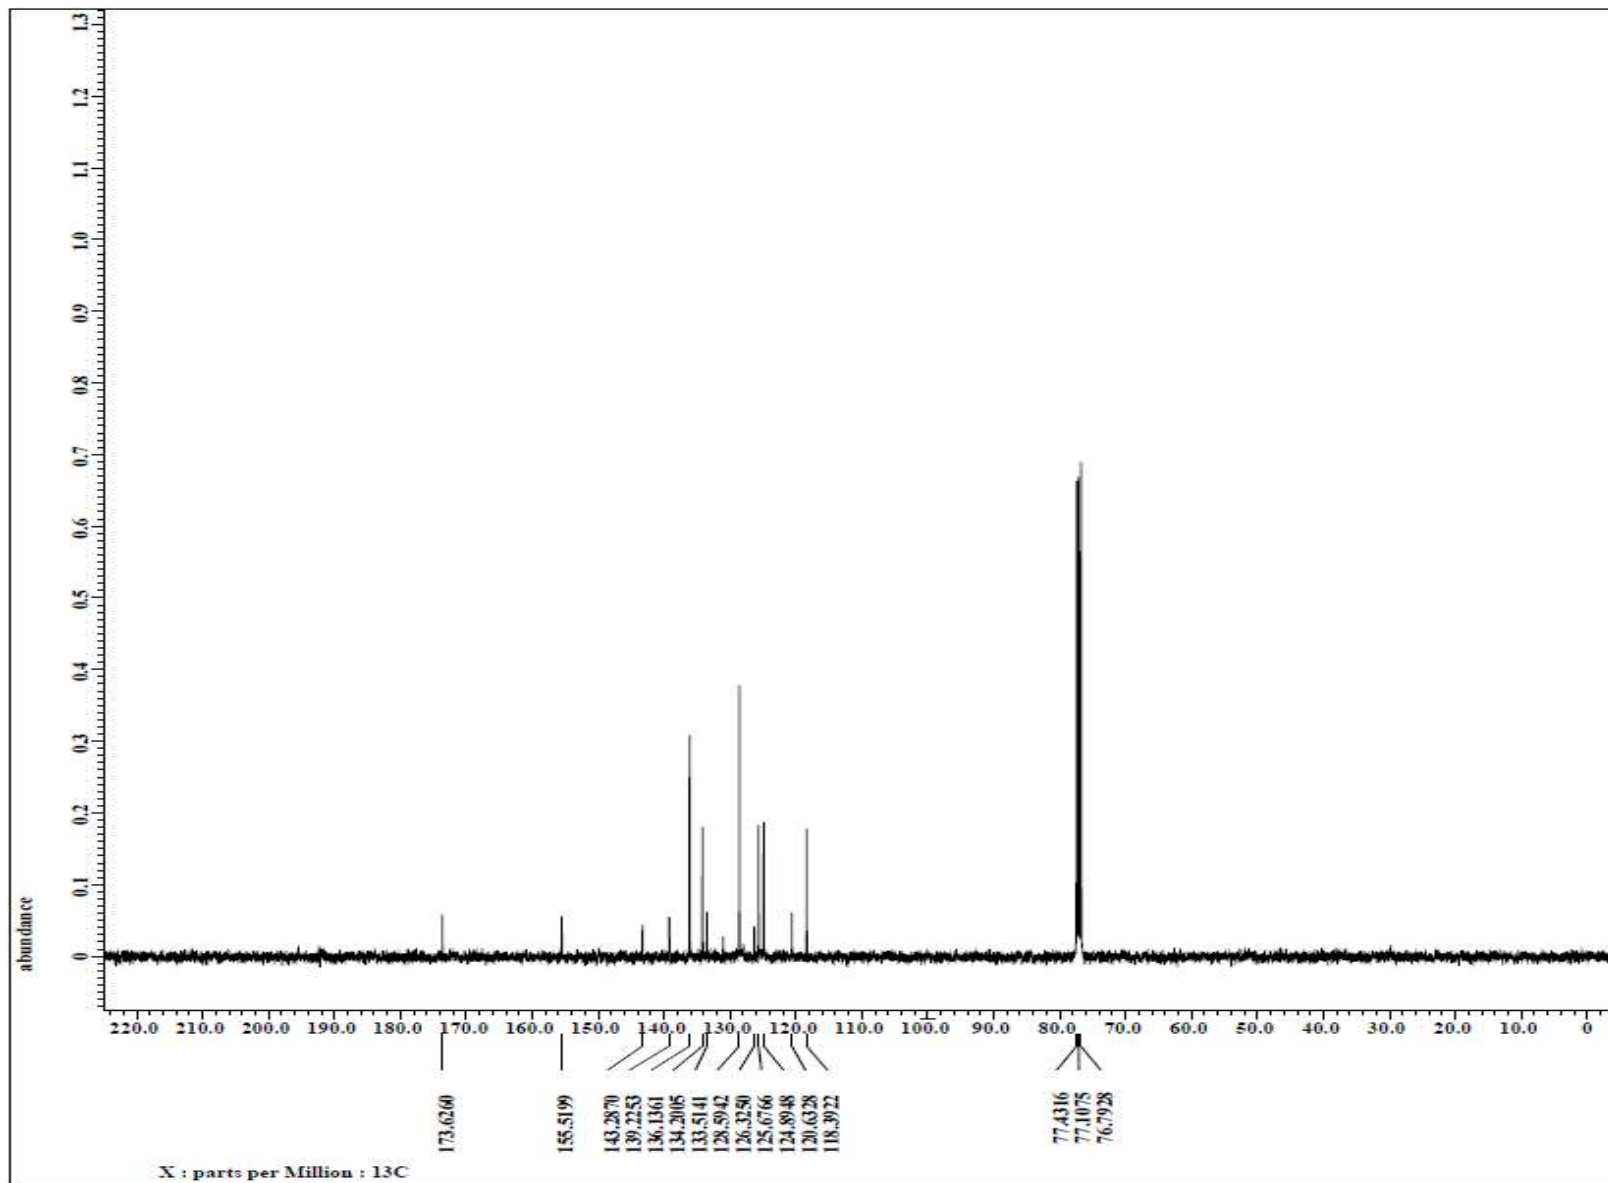



### 3-Hydroxy-2-(4-((trifluoromethyl)thio)phenyl)-4H-chromen-4-one (F3): HRMS (ESI)

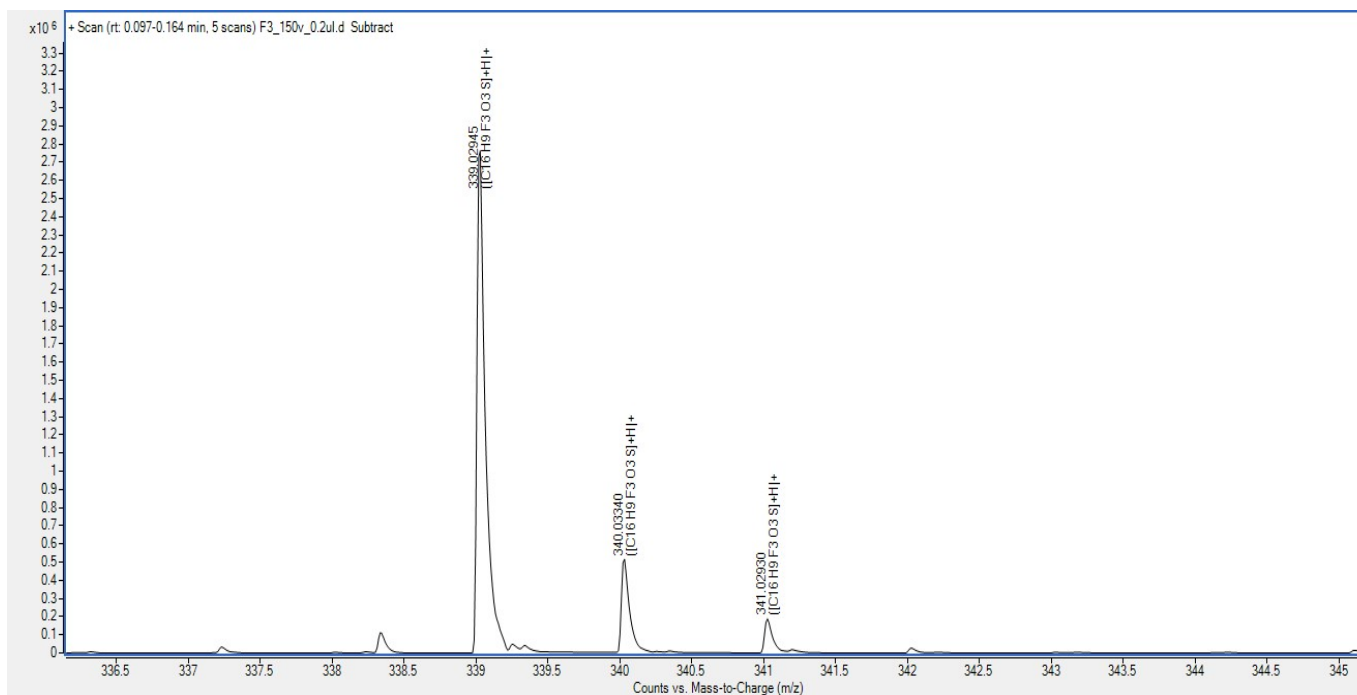

| Species, | Calc m/z  | Formula,        | Species,       | m/z,              | Score, | Diff (abs. ppm), | Mass      |
|----------|-----------|-----------------|----------------|-------------------|--------|------------------|-----------|
| M+,      | 338.0219  |                 |                |                   |        |                  |           |
| (M+H)+,  | 339.02973 | C16 H9 F3 O3 S, | <b>(M+H)+,</b> | <b>339.02945,</b> | 98.78, | 0.37,            | 338.02245 |
| (M+Na)+, | 361.01167 |                 |                |                   |        |                  |           |
| (M+K)+,  | 376.98561 |                 |                |                   |        |                  |           |

2-(4-Bromo-2-chlorophenyl)-3-hydroxy-4H-chromen-4-one (F4):  $^1\text{H-NMR}$  (400 MHz,  $\text{CDCl}_3$ ):

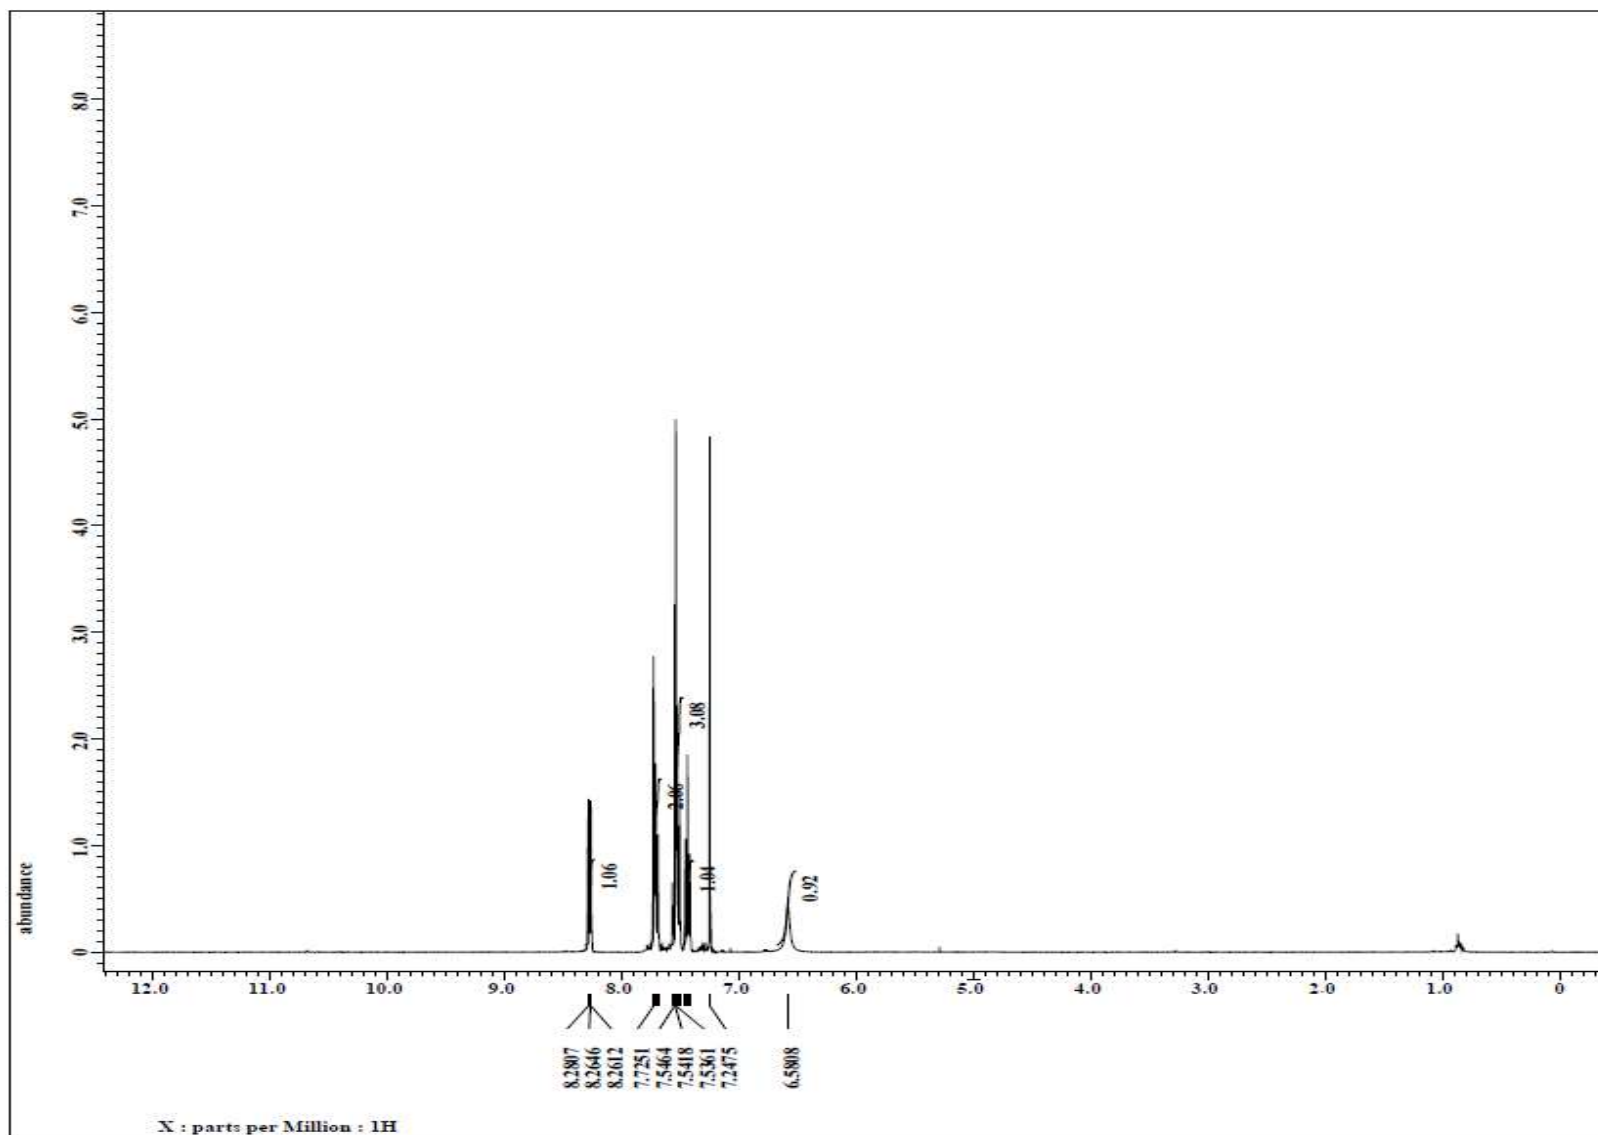

2-(4-Bromo-2-chlorophenyl)-3-hydroxy-4H-chromen-4-one (F4):  $^{13}\text{C}$ -NMR (100 MHz,  $\text{CDCl}_3$  and  $\text{DMSO-d}_6$ ):

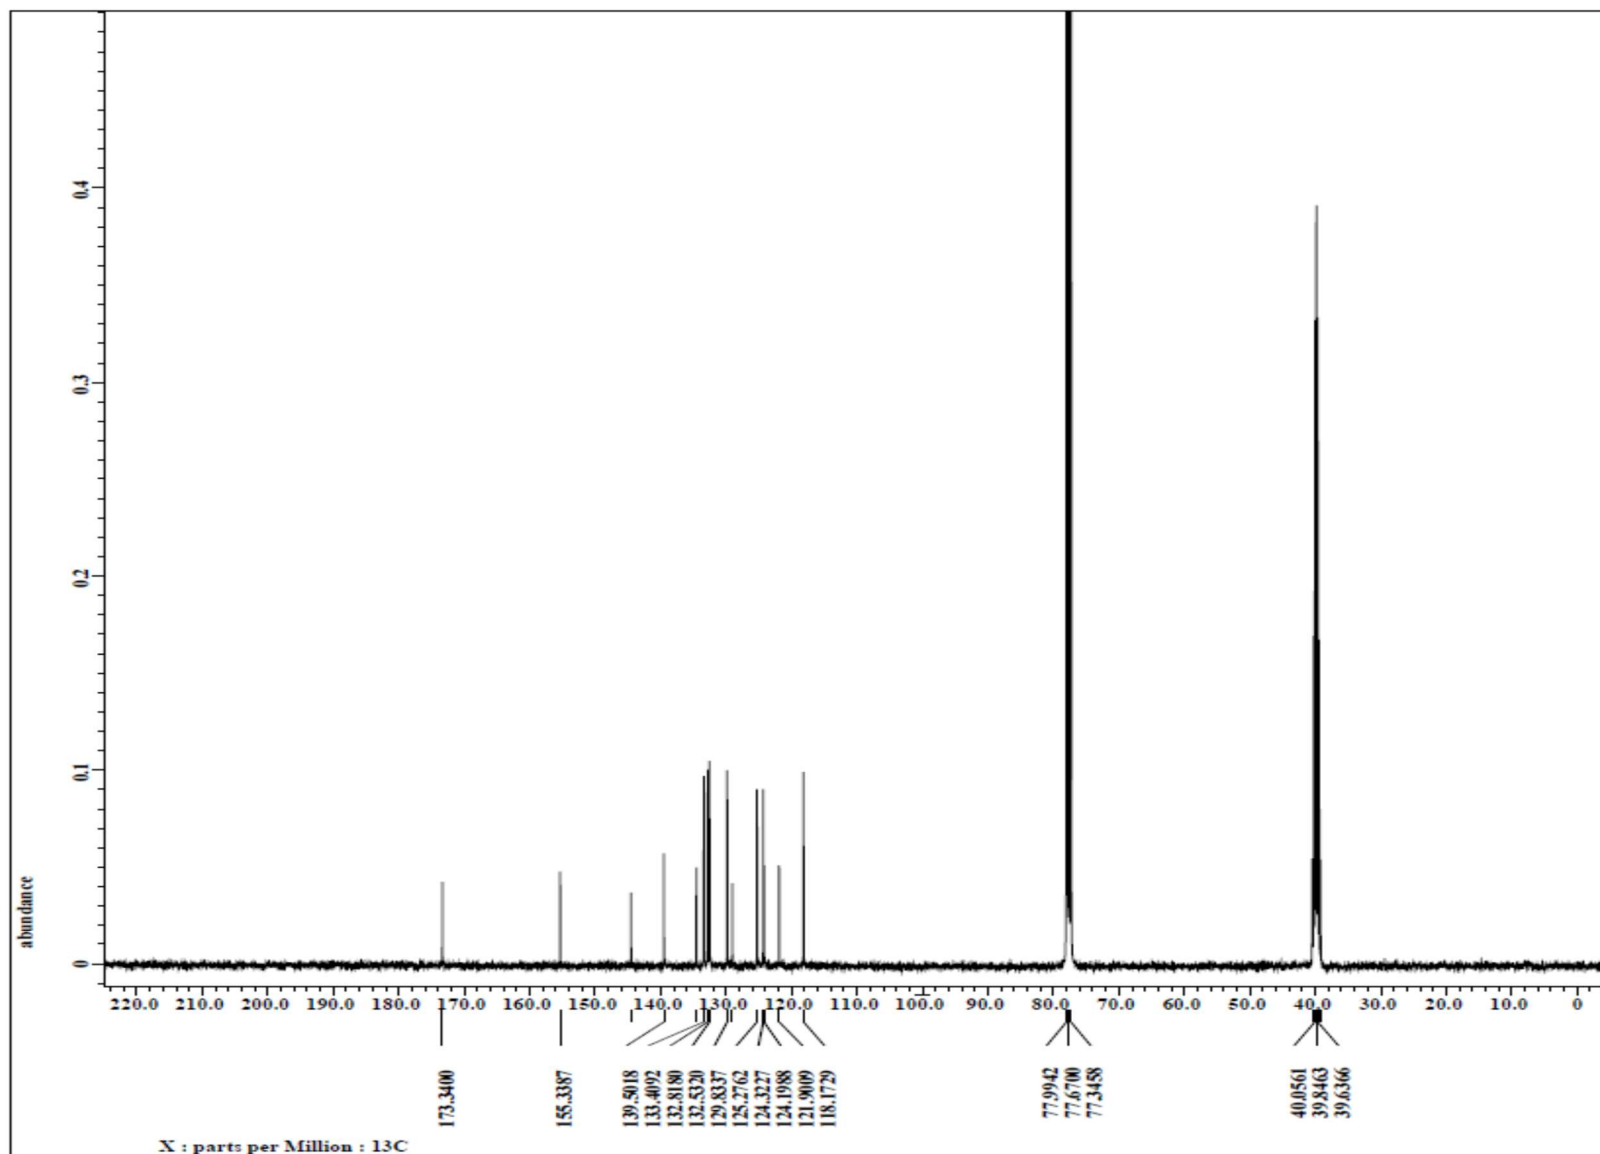

## 2-(4-Bromo-2-chlorophenyl)-3-hydroxy-4H-chromen-4-one (F4): HRMS (ESI)

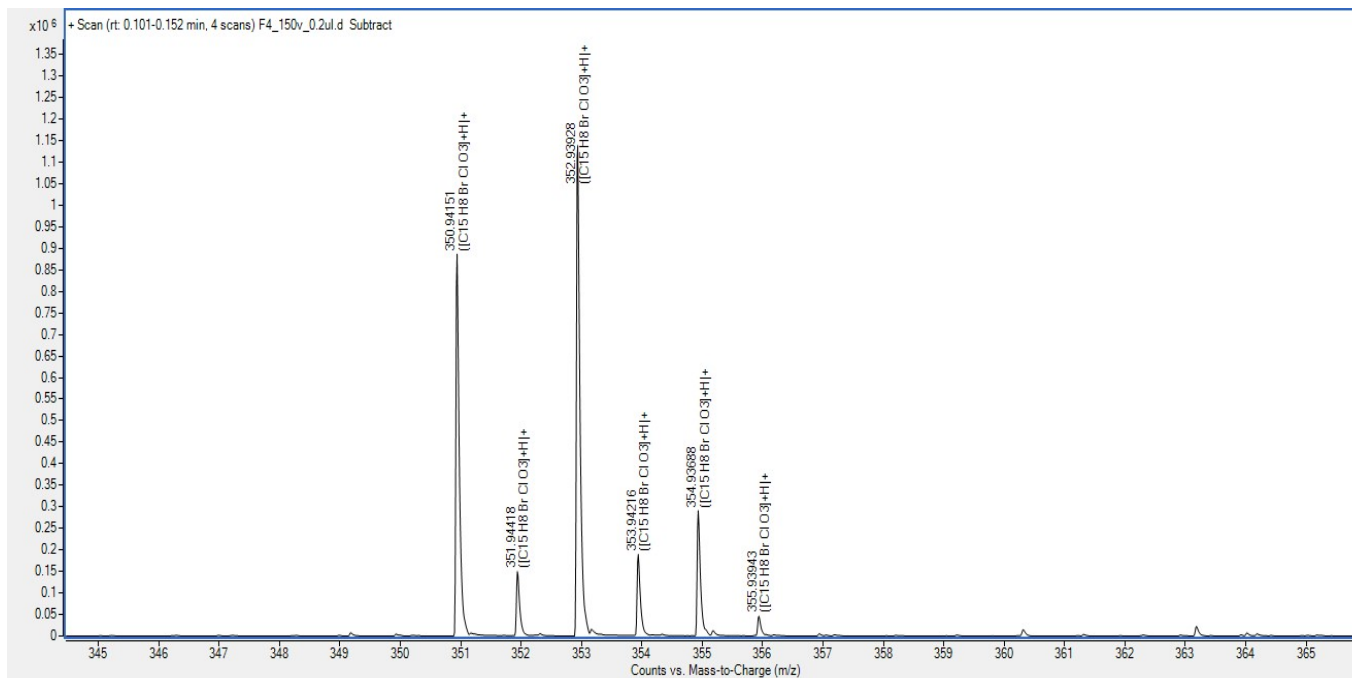

Species, Calc m/z

M+, 349.93399

(M+H)+, 350.94181

(M+Na)+, 372.92376

(M+K)+, 388.89769

| Formula,                                              | Species, | m/z,       | Score, | Diff (abs. ppm), | Mass      |
|-------------------------------------------------------|----------|------------|--------|------------------|-----------|
| C <sub>15</sub> H <sub>8</sub> Br Cl O <sub>3</sub> , | (M+H)+,  | 350.94151, | 98.69, | 1.28,            | 349.93453 |

2-(2,4-Bis(trifluoromethyl)phenyl)-3-hydroxy-4H-chromen-4-one (F5): <sup>1</sup>H-NMR (400 MHz, CDCl<sub>3</sub>)

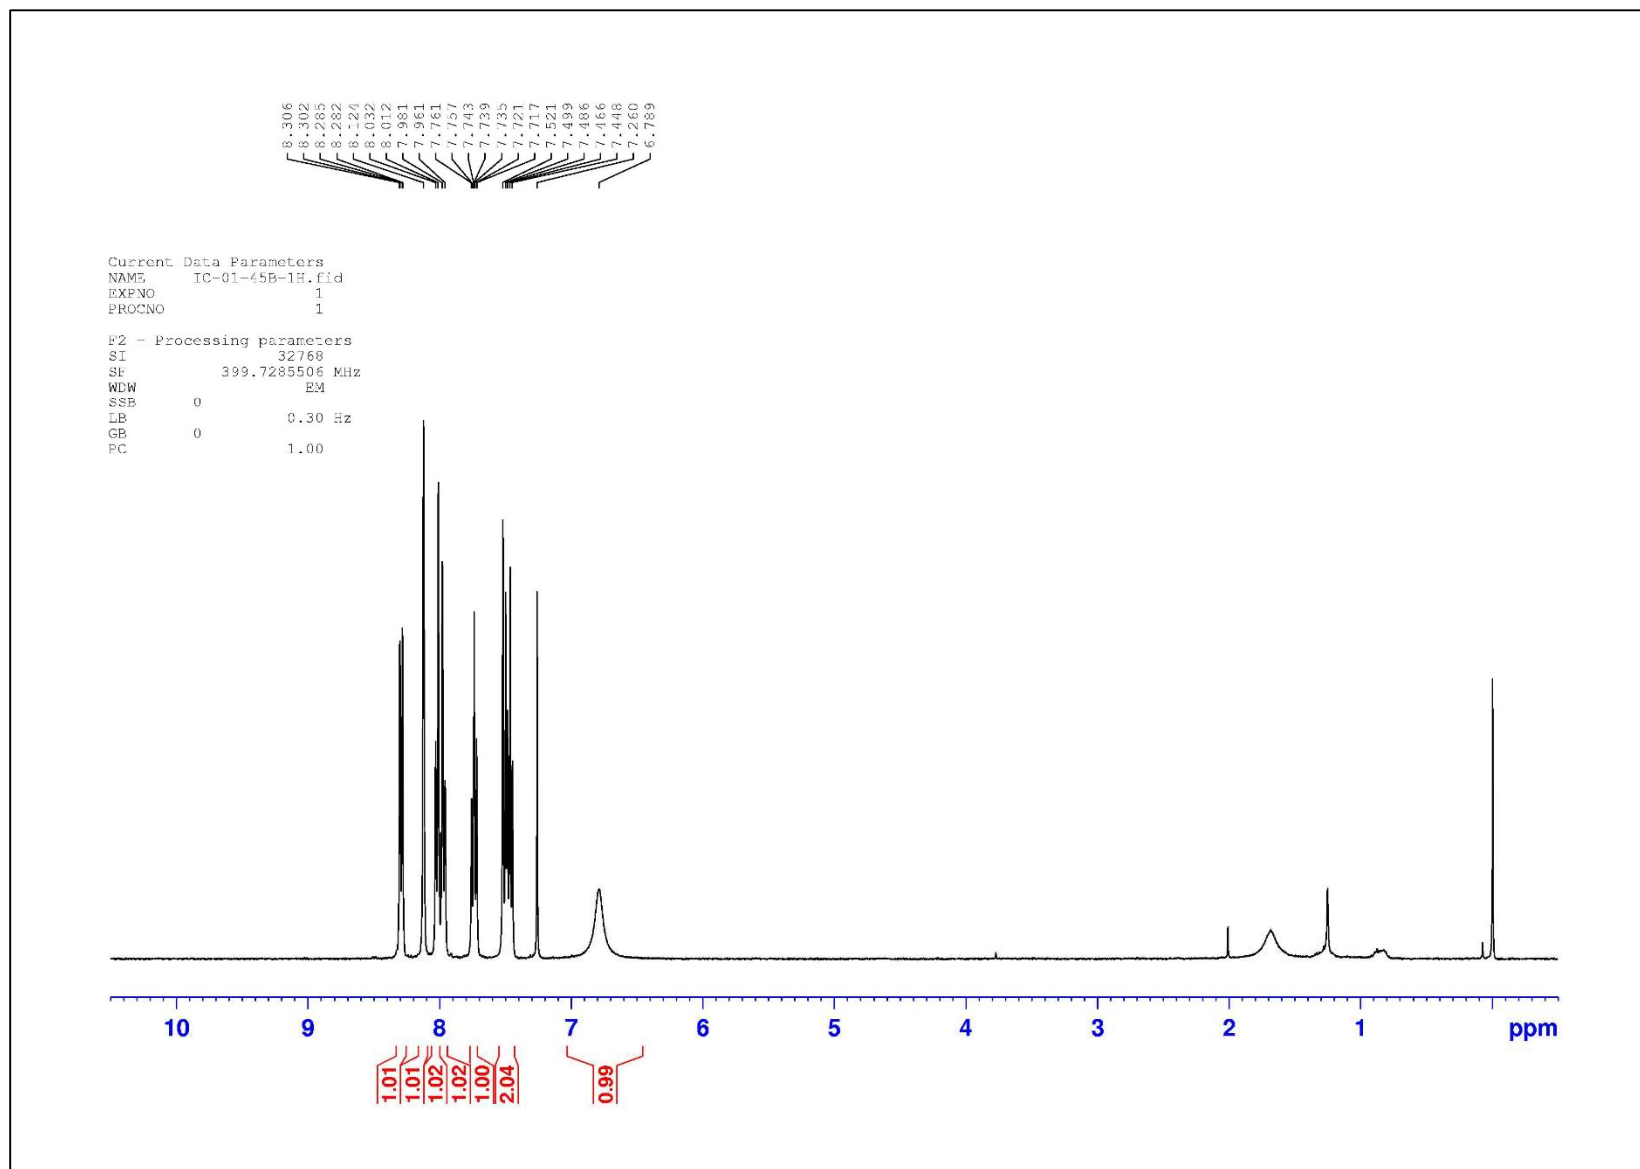

2-(2,4-Bis(trifluoromethyl)phenyl)-3-hydroxy-4H-chromen-4-one (F5):  $^{13}\text{C}$ -NMR (100 MHz;  $\text{CDCl}_3$ )

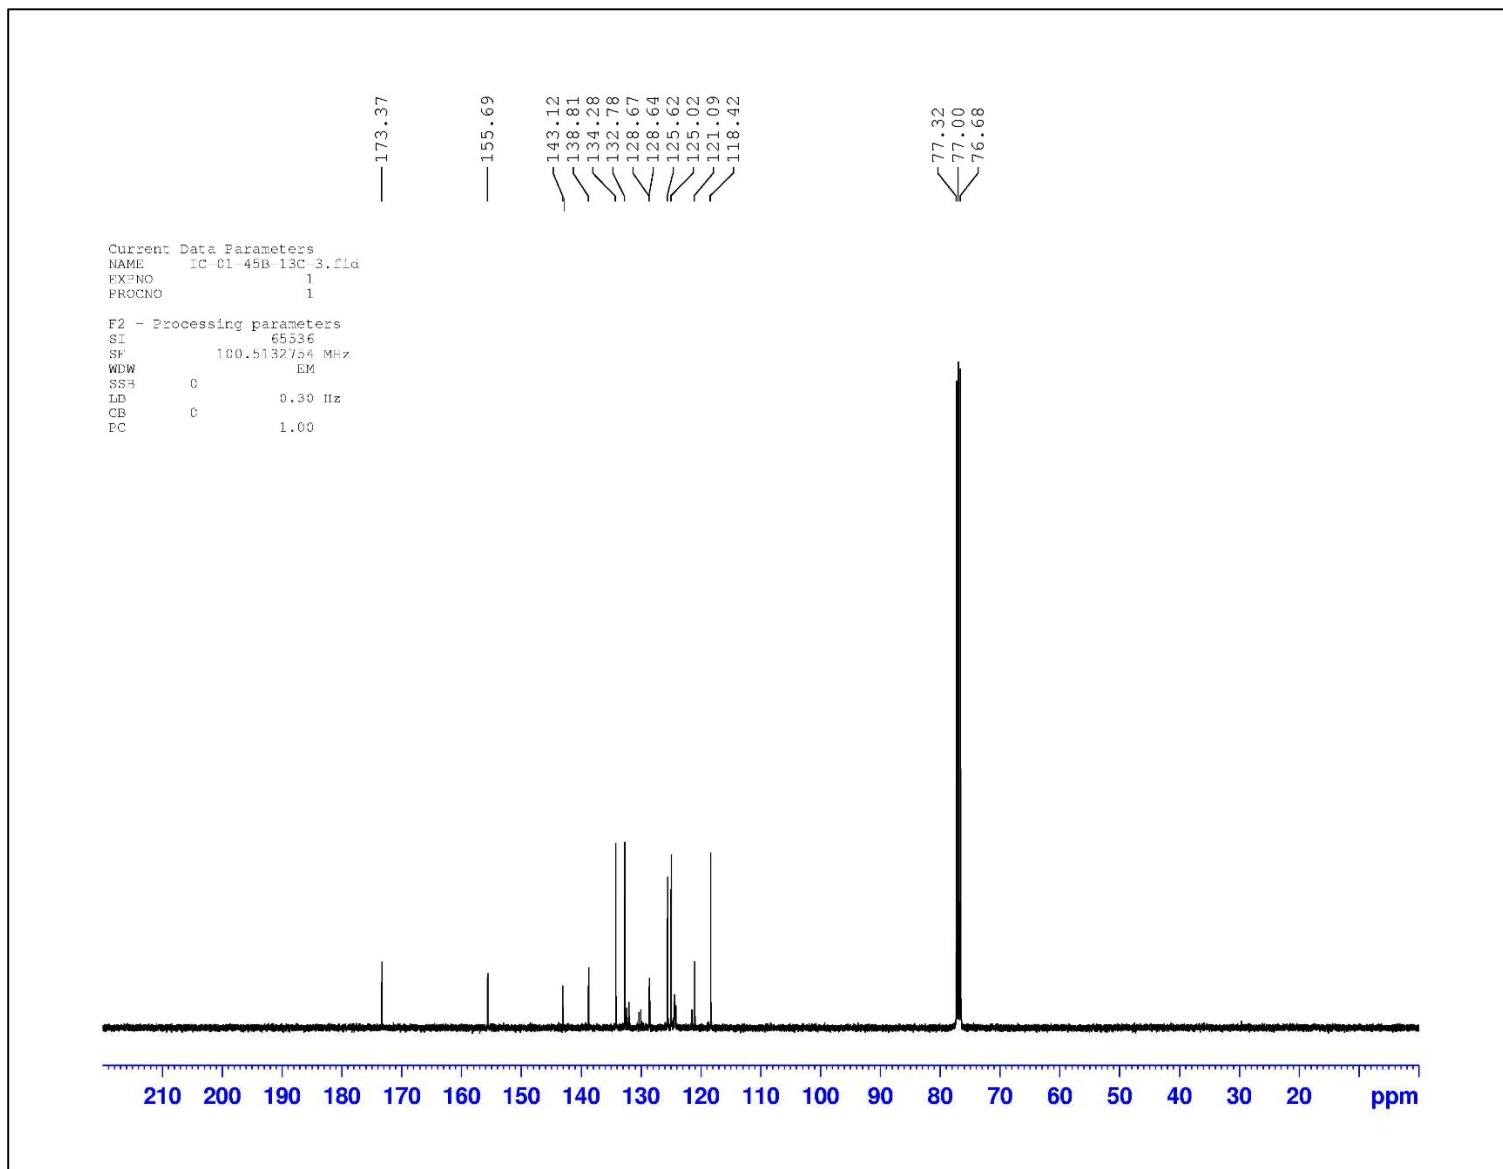

**2-(2,4-Bis(trifluoromethyl)phenyl)-3-hydroxy-4H-chromen-4-one (F5): HRMS (ESI)**

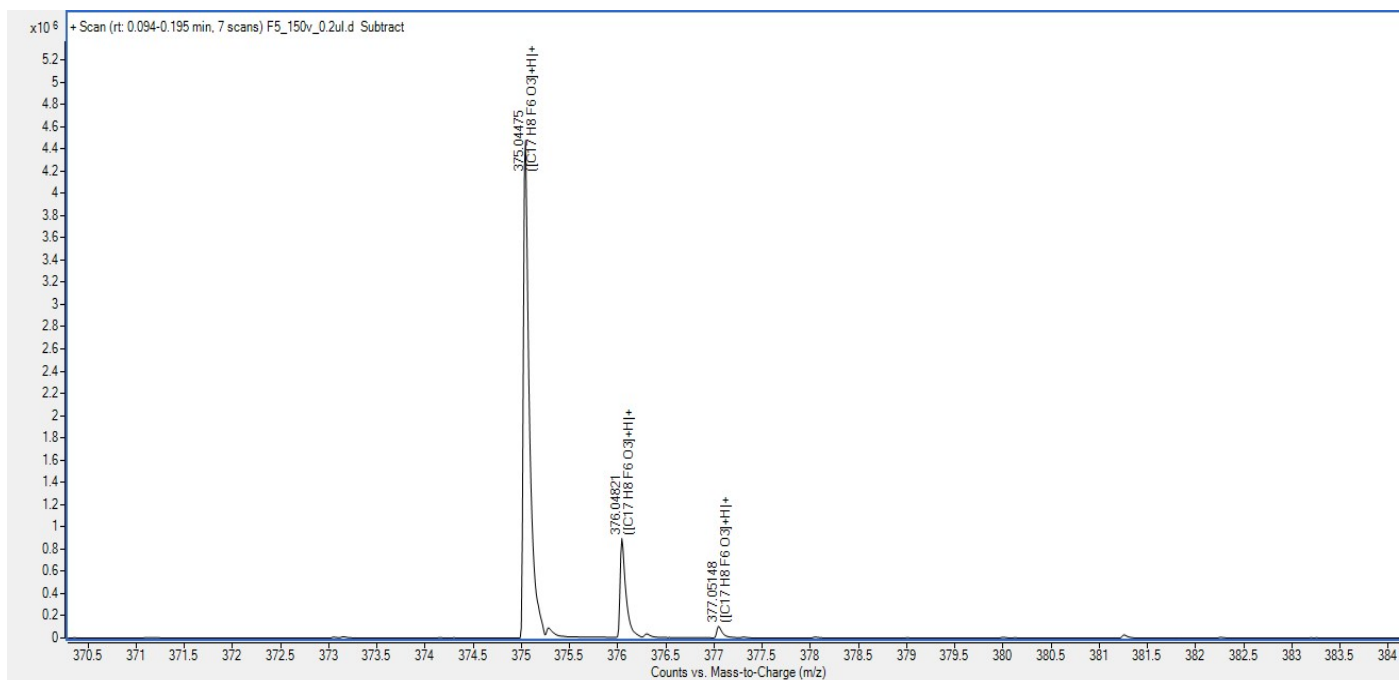

| Species,              | Calc m/z  | Formula,                                                       | Species,             | m/z,              | Score, | Diff (abs. ppm), | Mass      |
|-----------------------|-----------|----------------------------------------------------------------|----------------------|-------------------|--------|------------------|-----------|
| M+,                   | 374.03721 | C <sub>17</sub> H <sub>8</sub> F <sub>6</sub> O <sub>3</sub> , | (M+H) <sup>+</sup> , | <b>375.04475,</b> | 99.3,  | 0.7,             | 374.03776 |
| (M+H) <sup>+</sup> ,  | 375.04504 |                                                                |                      |                   |        |                  |           |
| (M+Na) <sup>+</sup> , | 397.02698 |                                                                |                      |                   |        |                  |           |
| (M+K) <sup>+</sup> ,  | 413.00092 |                                                                |                      |                   |        |                  |           |

2-(3,5-Bis(trifluoromethyl)phenyl)-3-hydroxy-4H-chromen-4-one (F6):  $^1\text{H-NMR}$  (400 MHz,  $\text{CDCl}_3$ ):

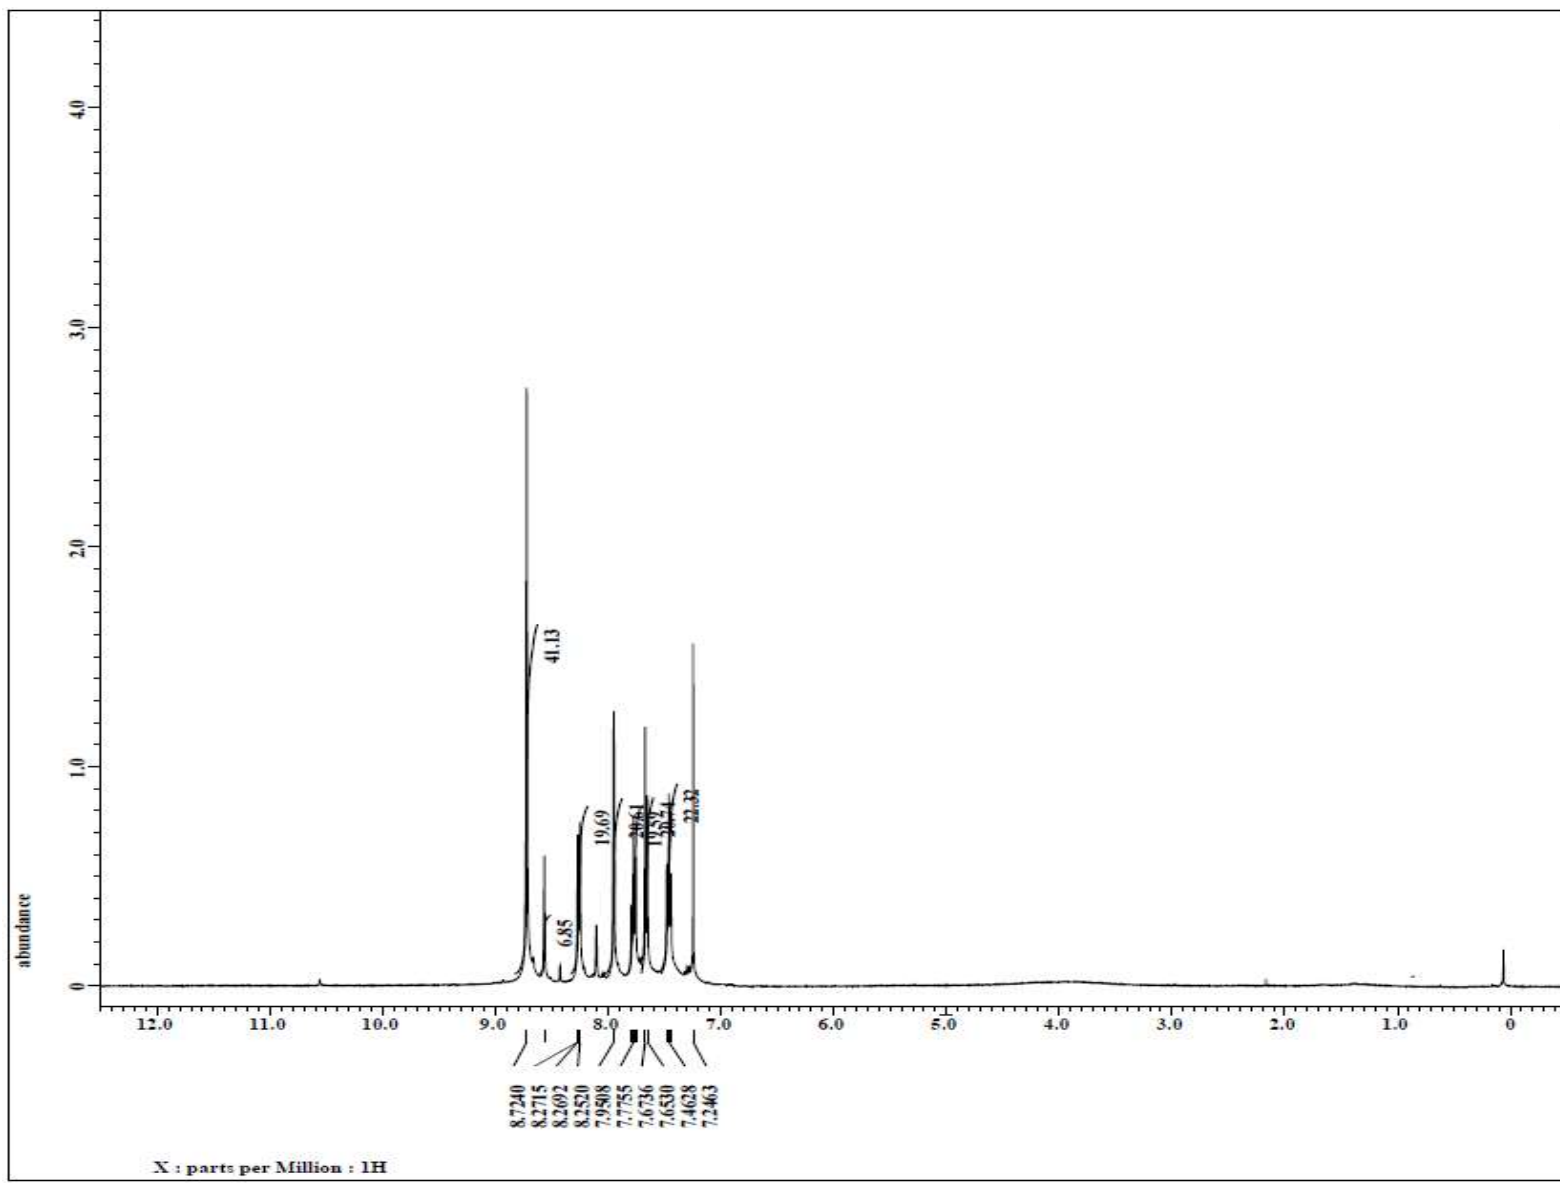



2-(3,5-Bis(trifluoromethyl)phenyl)-3-hydroxy-4H-chromen-4-one (F6):  $^{13}\text{C}$ -NMR (100 MHz;  $\text{CDCl}_3$ )

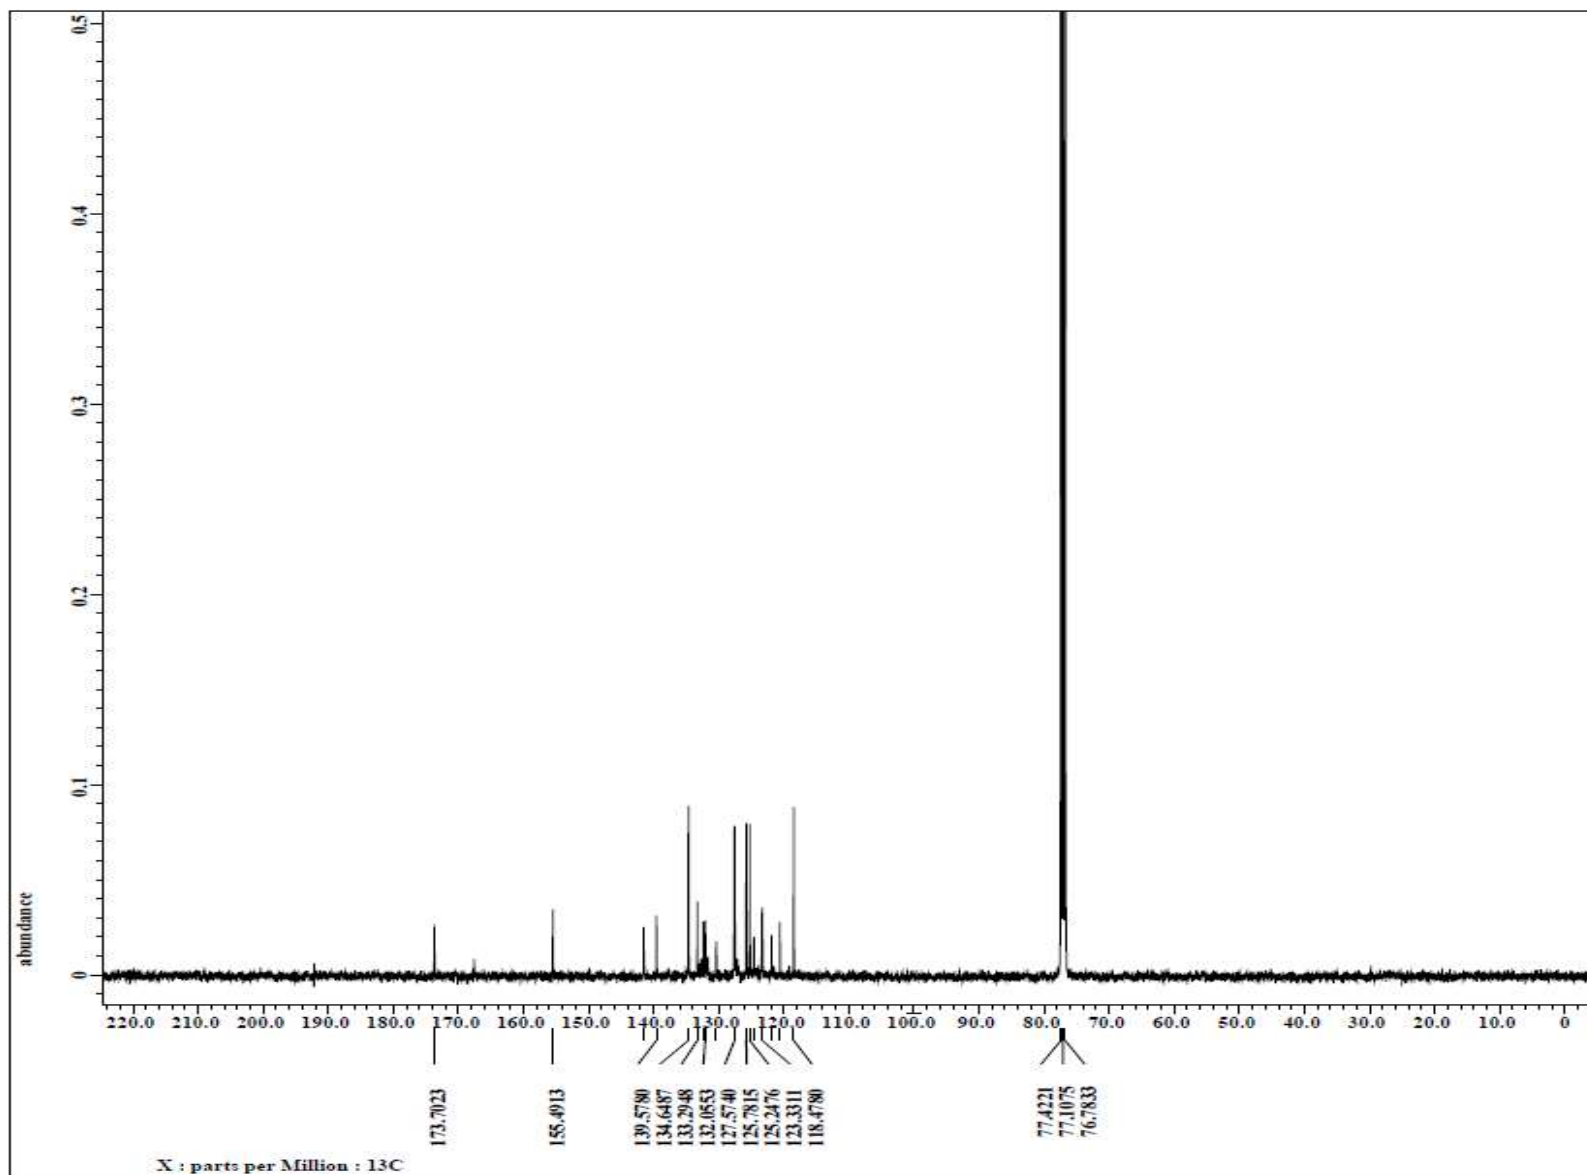

## 2-(3,5-Bis(trifluoromethyl)phenyl)-3-hydroxy-4H-chromen-4-one (F6): HRMS (ESI)

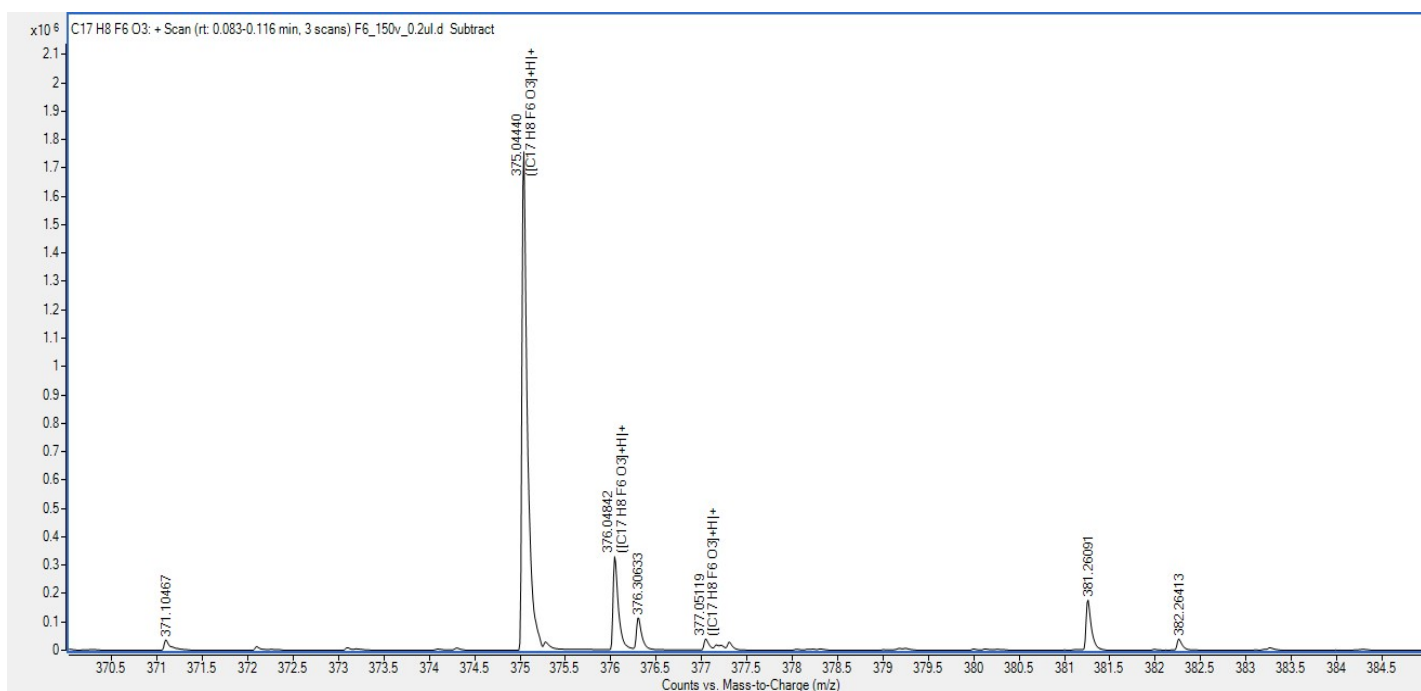

**Species, Calc m/z**

M+, 374.03721

(M+H)+, 375.04504

(M+Na)+, 397.02698

(M+K)+, 413.00092

| Formula,      | Species, | m/z,       | Score, | Diff (abs. ppm), | Mass      |
|---------------|----------|------------|--------|------------------|-----------|
| C17 H8 F6 O3, | (M+H)+,  | 375.04440, | 98.67, | 1.41,            | 374.03776 |

2-(4-(Benzyloxy)phenyl)-3-hydroxy-4H-chromen-4-one (F7):  $^1\text{H-NMR}$  (400 MHz,  $\text{CDCl}_3$ ):

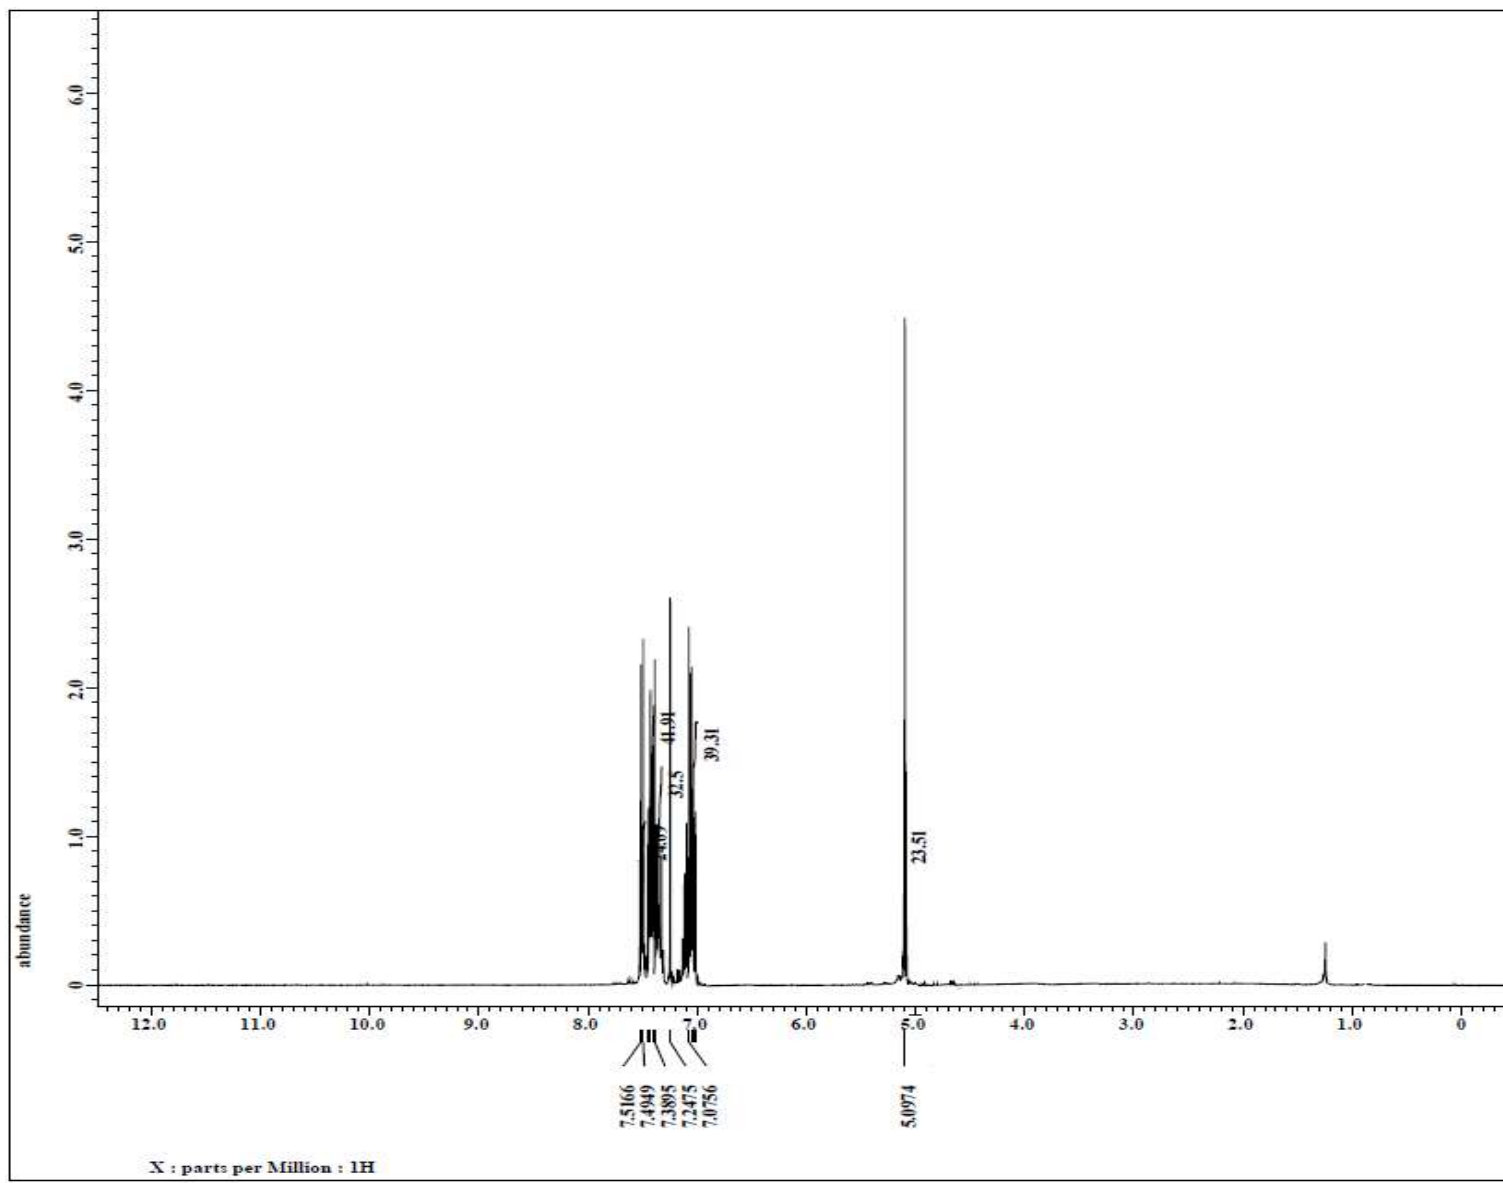

2-(4-(Benzyloxy)phenyl)-3-hydroxy-4H-chromen-4-one (F7):  $^{13}\text{C}$ -NMR (100 MHz;  $\text{CDCl}_3$ )

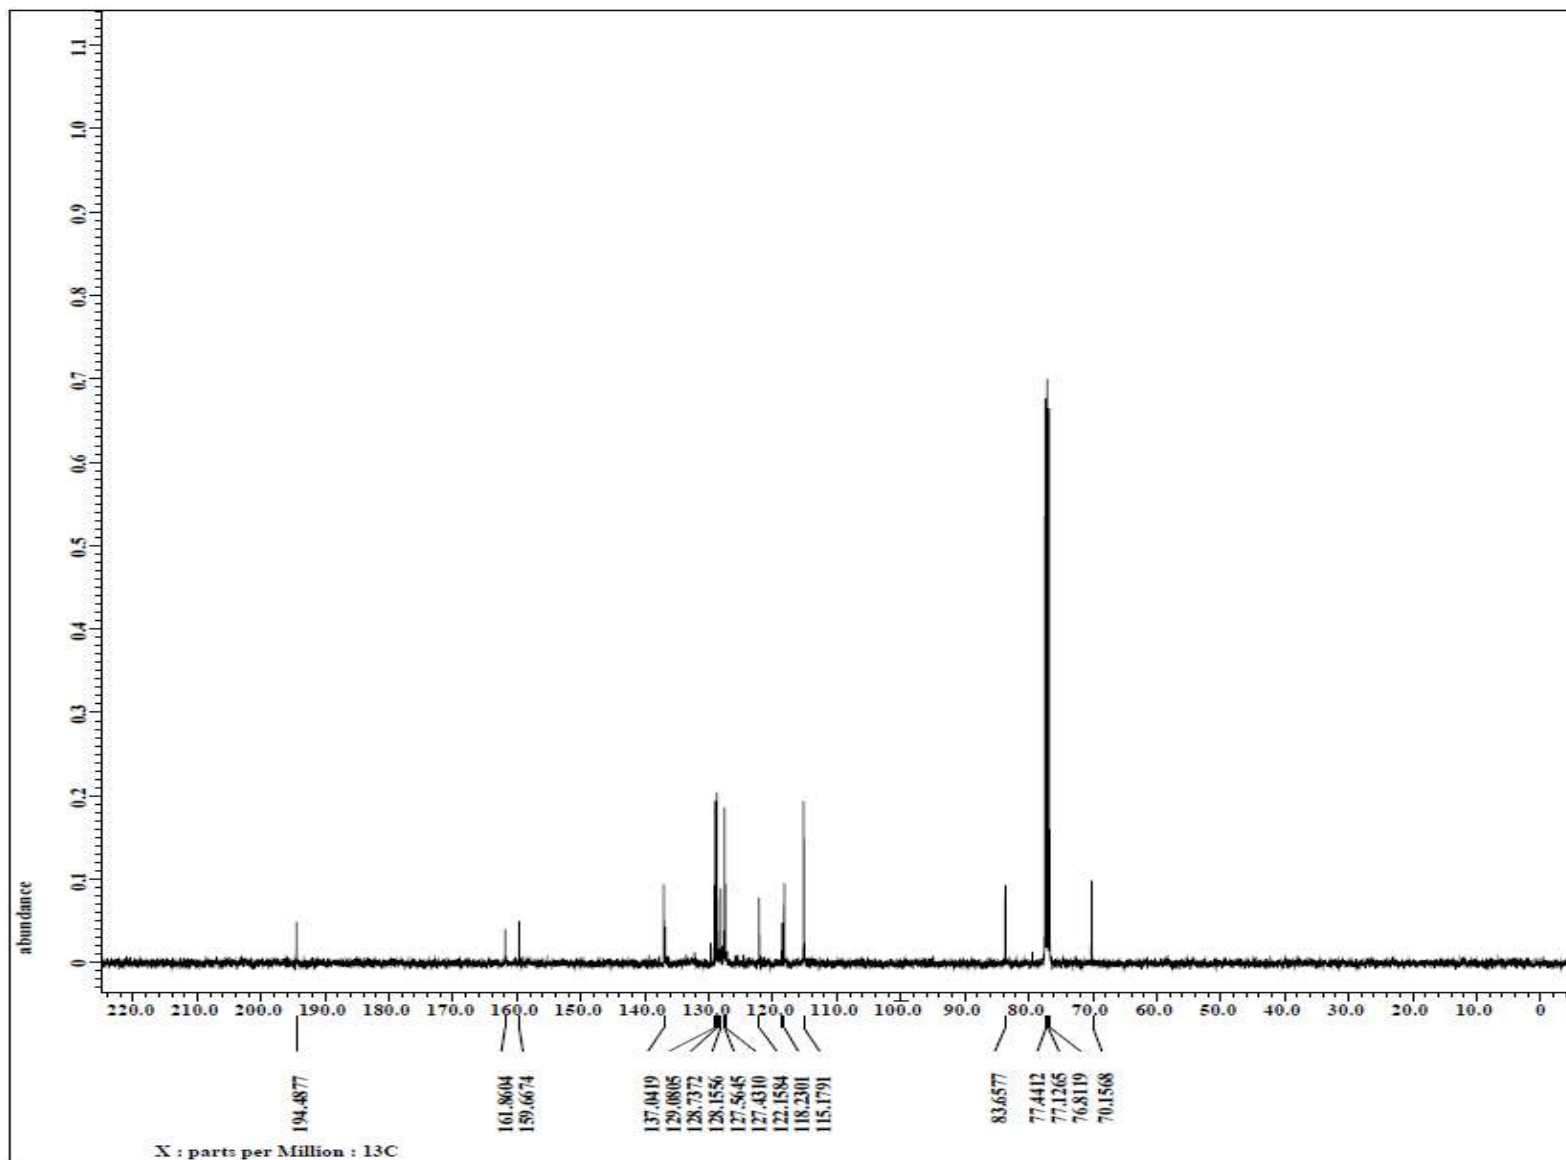

**2-(4-(Benzyloxy)phenyl)-3-hydroxy-4H-chromen-4-one (F7): HRMS (ESI)**

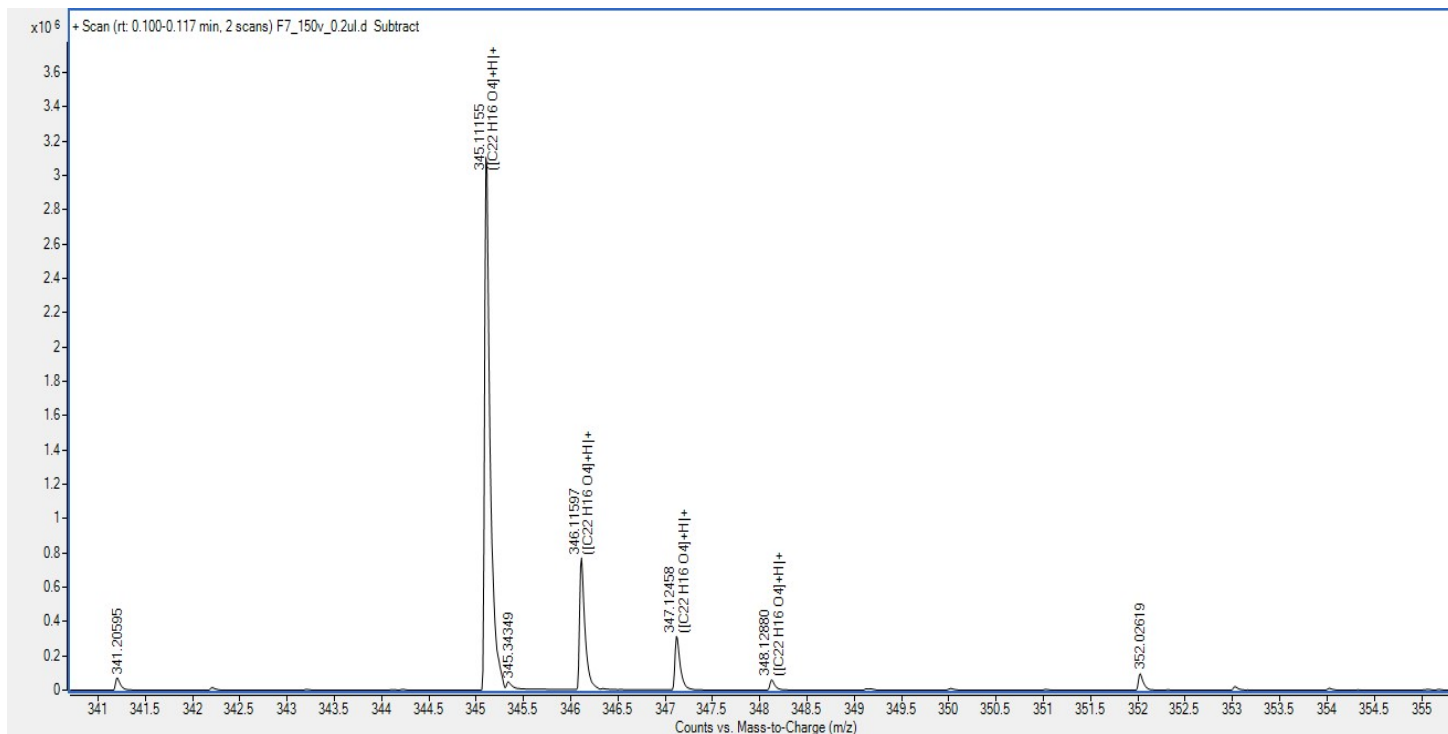

Species, Calc m/z

M+, 344.10431

(M+H)+, 345.11214

(M+Na)+, 367.09408

(M+K)+, 383.06802

| Formula,                                         | Species, | m/z,       | Score, | Diff (abs. ppm), | Mass      |
|--------------------------------------------------|----------|------------|--------|------------------|-----------|
| C <sub>22</sub> H <sub>16</sub> O <sub>4</sub> , | (M+H)+,  | 345.11155, | 80.08, | 0.63,            | 344.10486 |

2-(3-Chlorophenyl)-3-hydroxy-7-methyl-4H-chromen-4-one (F8):  $^1\text{H-NMR}$  (400 MHz,  $\text{CDCl}_3$ ):

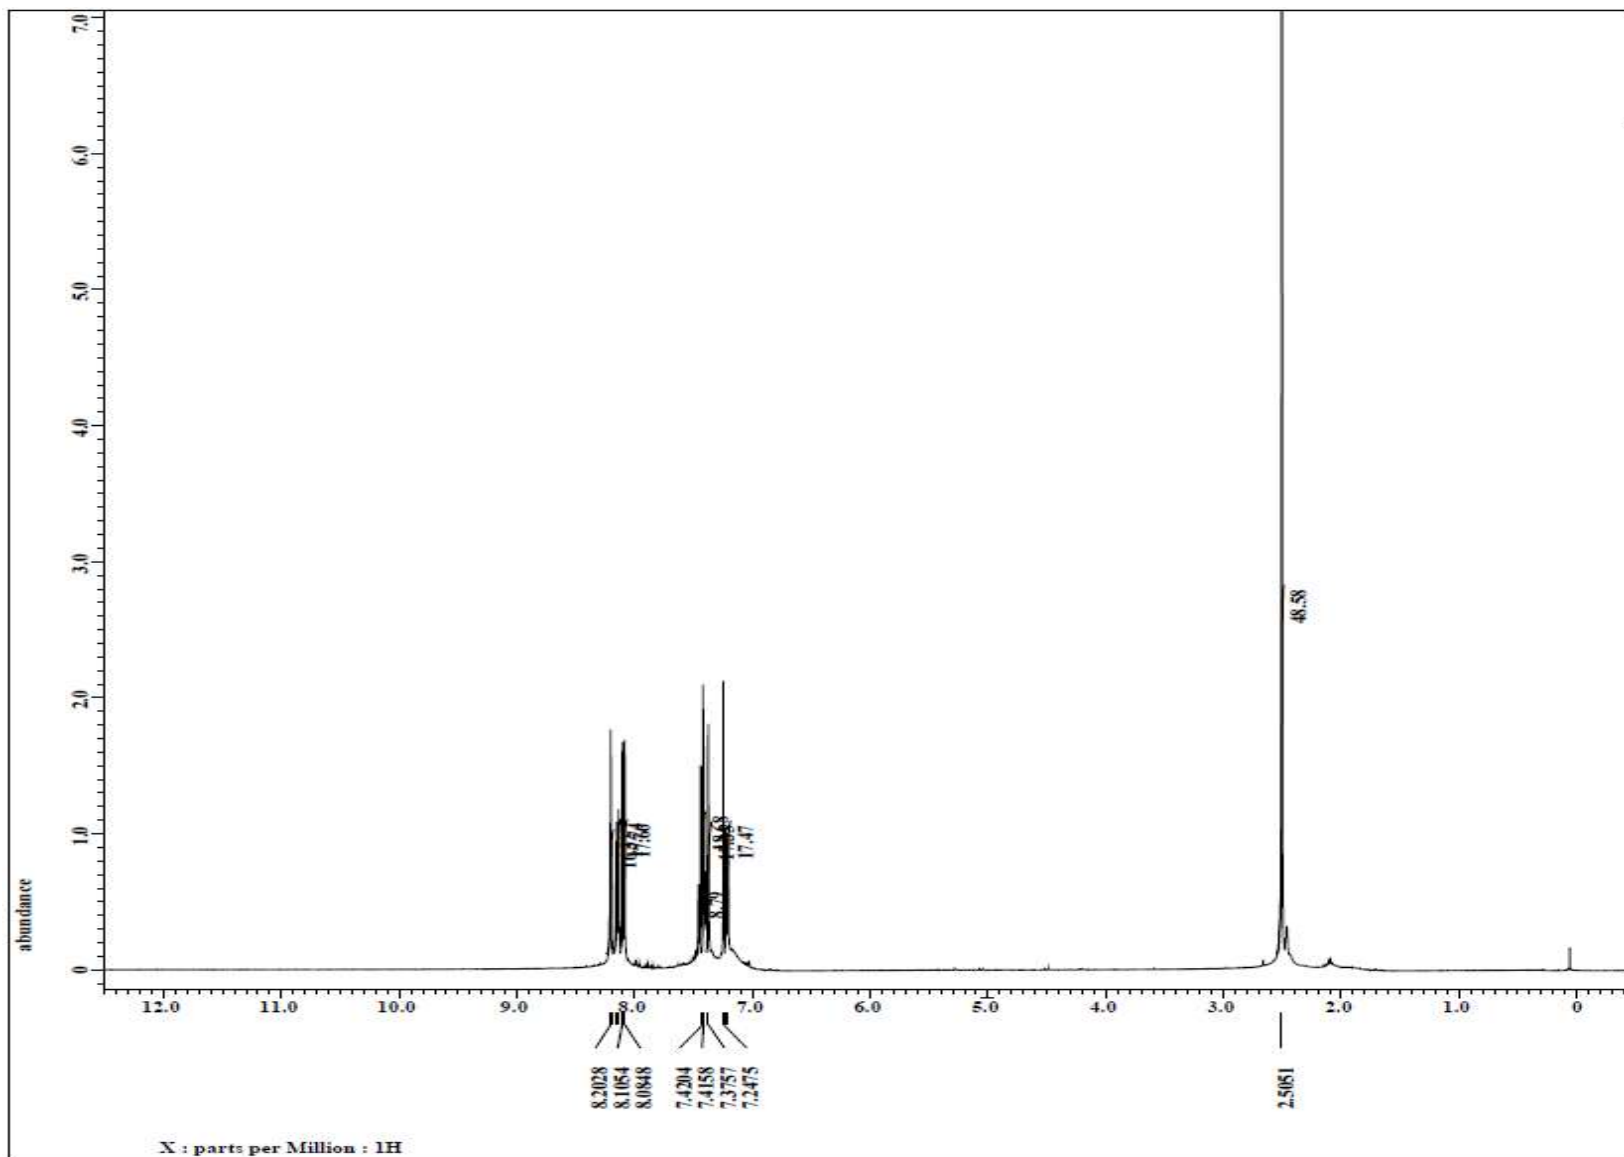

2-(3-Chlorophenyl)-3-hydroxy-7-methyl-4H-chromen-4-one (F8):  $^{13}\text{C}$ -NMR (100 MHz;  $\text{CDCl}_3$ )

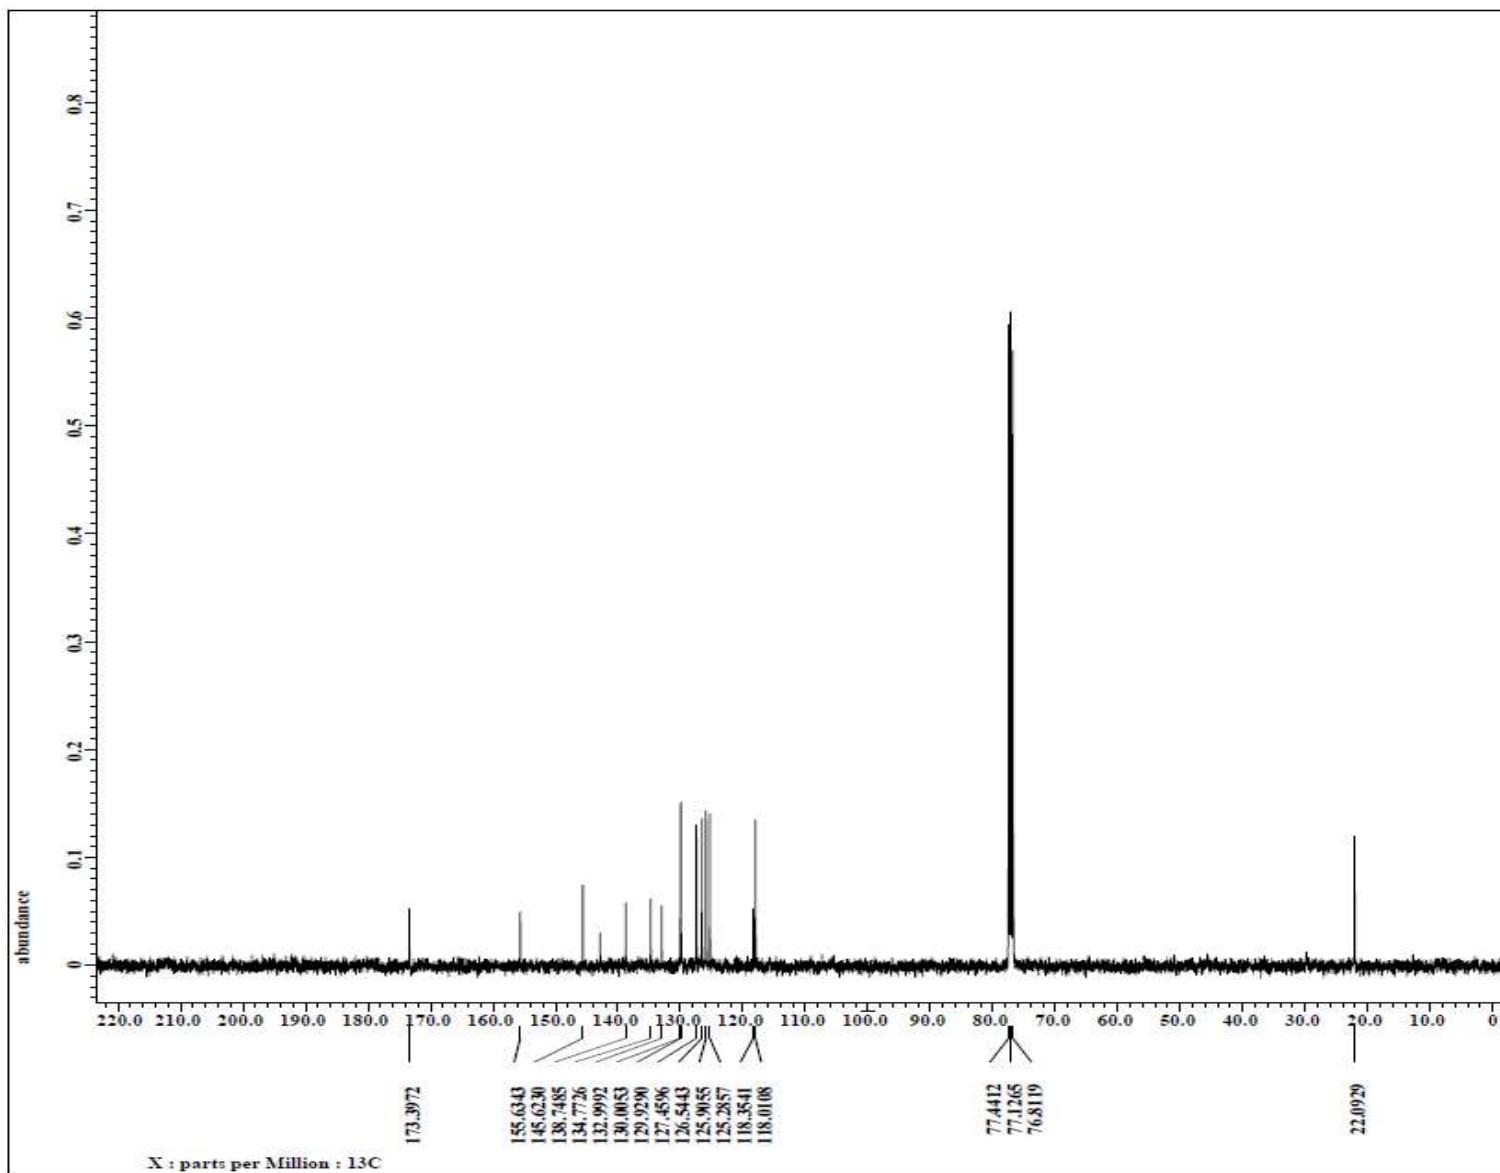

**2-(3-Chlorophenyl)-3-hydroxy-7-methyl-4H-chromen-4-one (F8): HRMS (ESI)**

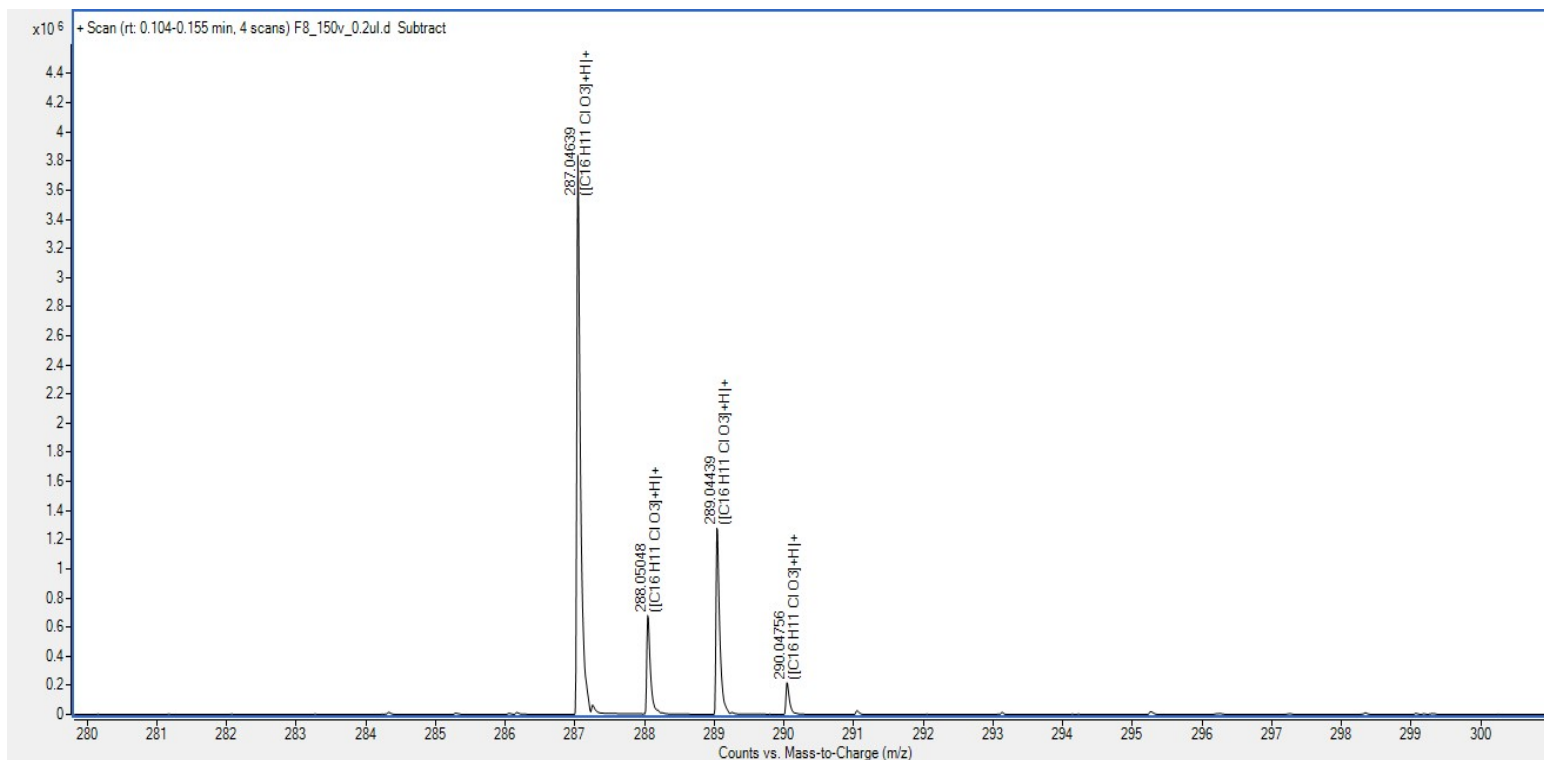

| Species, | Calc m/z  | Formula,       | Species, | m/z,       | Score, | Diff (abs. ppm), | Mass      |
|----------|-----------|----------------|----------|------------|--------|------------------|-----------|
| M+,      | 286.03912 |                |          |            |        |                  |           |
| (M+H)+,  | 287.04695 | C16 H11 Cl O3, | (M+H)+,  | 287.04639, | 98.49, | 1.3,             | 286.03967 |
| (M+Na)+, | 309.02889 |                |          |            |        |                  |           |
| (M+K)+,  | 325.00283 |                |          |            |        |                  |           |



3-Hydroxy-2-(3-methoxyphenyl)-7-methyl-4H-chromen-4-one (F9):  $^1\text{H-NMR}$  (400 MHz,  $\text{CDCl}_3$ ):

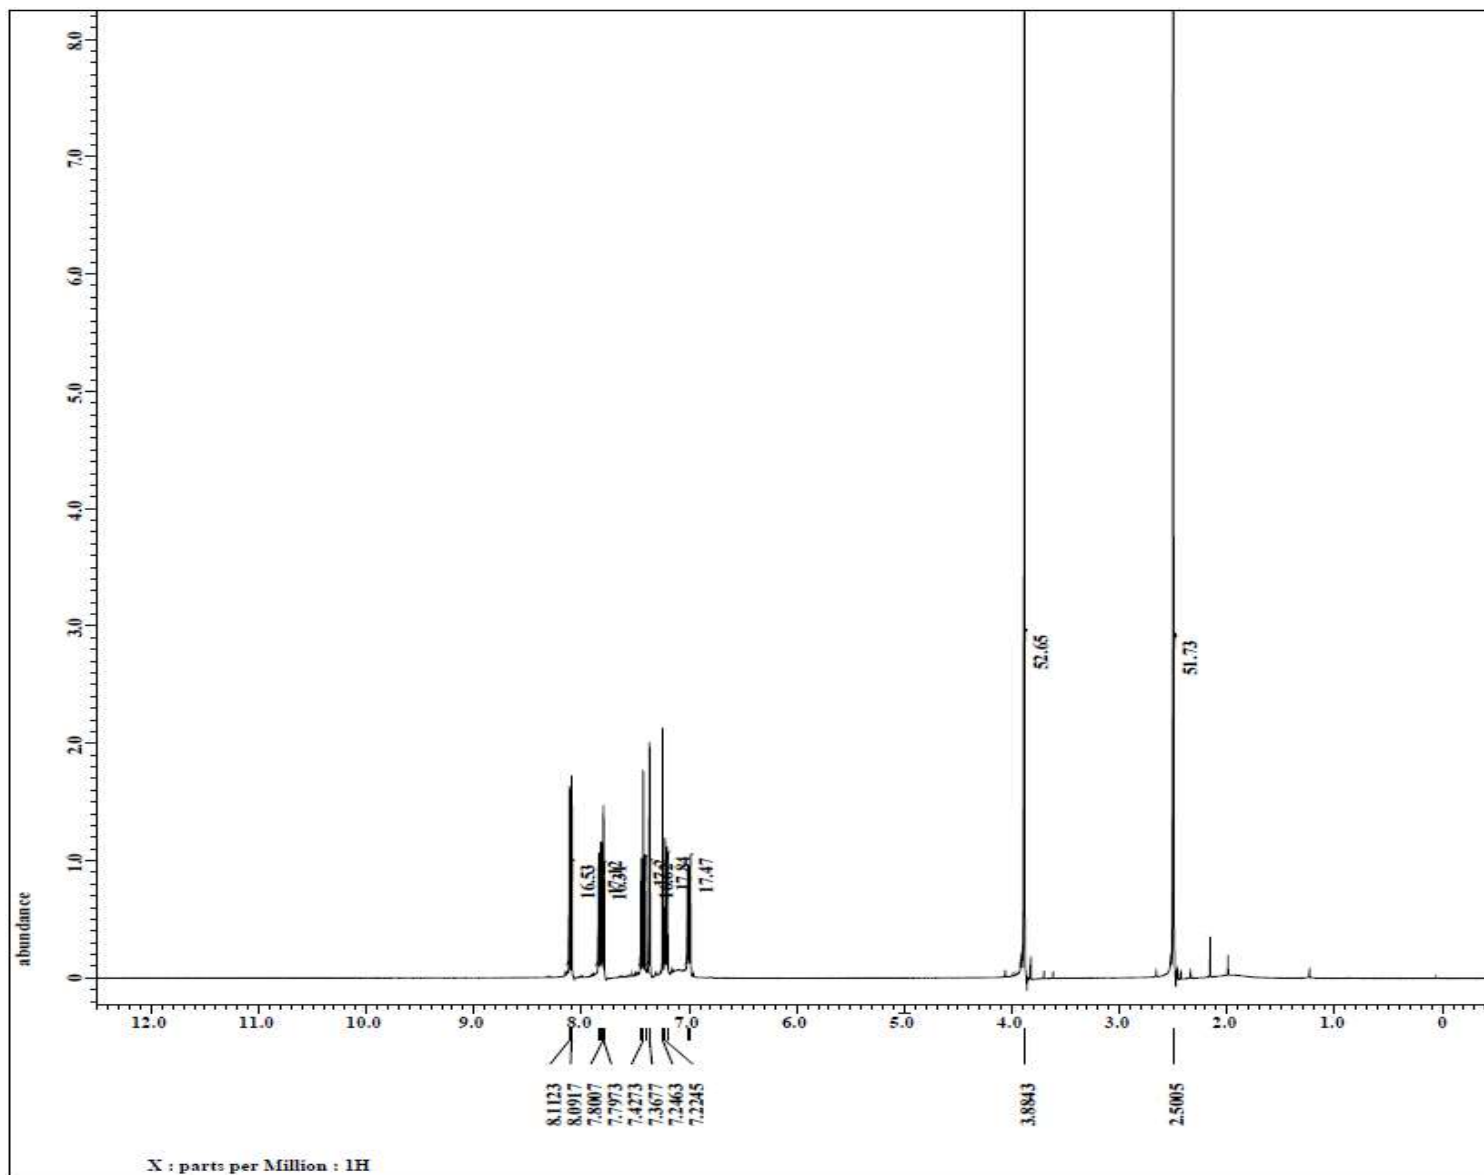

3-Hydroxy-2-(3-methoxyphenyl)-7-methyl-4H-chromen-4-one (F9):  $^{13}\text{C}$ -NMR (100 MHz;  $\text{CDCl}_3$ )

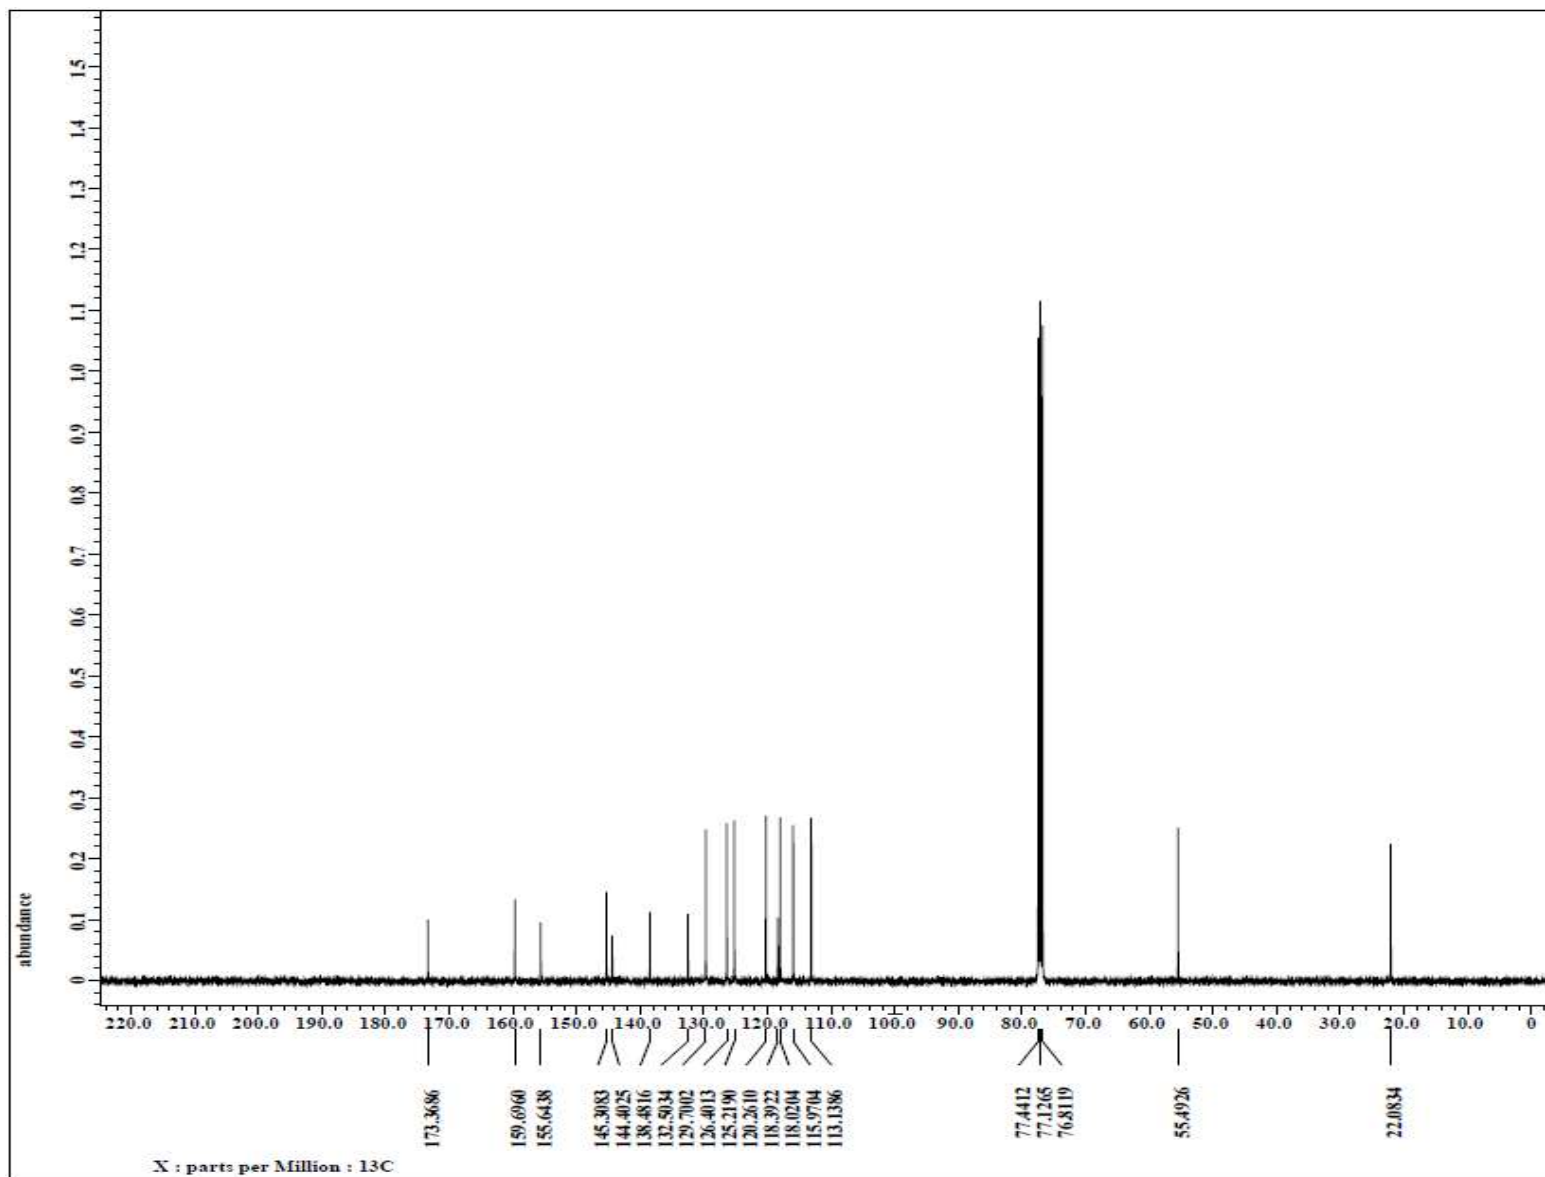

### 3-Hydroxy-2-(3-methoxyphenyl)-7-methyl-4H-chromen-4-one (F9): HRMS (ESI)

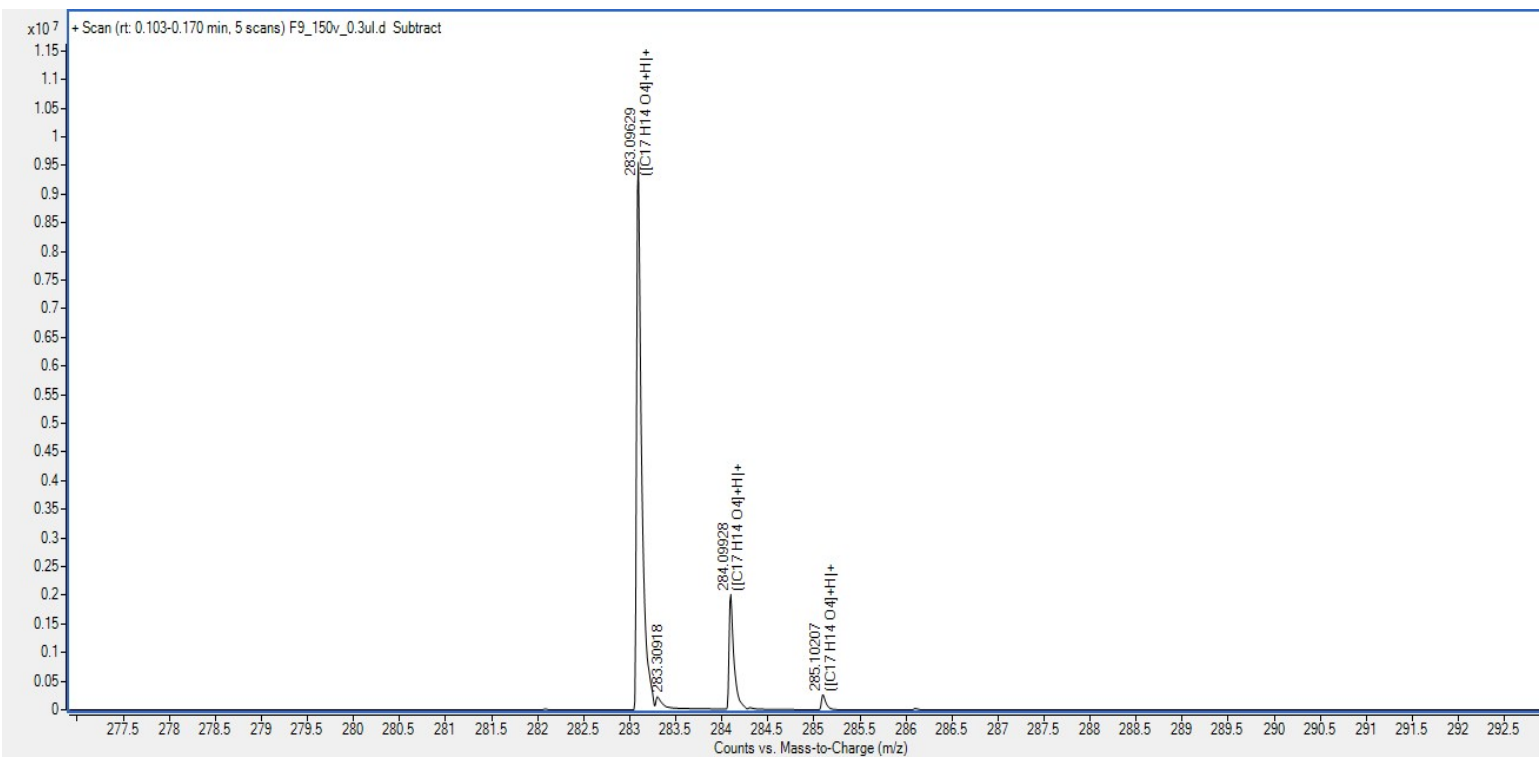

| Species, | Calc m/z  | Formula,    | Species,       | m/z,              | Score, | Diff (abs. ppm), | Mass      |
|----------|-----------|-------------|----------------|-------------------|--------|------------------|-----------|
| M+,      | 282.08866 |             |                |                   |        |                  |           |
| (M+H)+,  | 283.09649 | C17 H14 O4, | <b>(M+H)+,</b> | <b>283.09629,</b> | 98.15, | 0.94,            | 282.08921 |
| (M+Na)+, | 305.07843 |             |                |                   |        |                  |           |
| (M+K)+,  | 321.05237 |             |                |                   |        |                  |           |

2-(2-Bromo-3,4-dimethoxyphenyl)-3-hydroxy-7-methyl-4H-chromen-4-one (F10):  $^1\text{H-NMR}$  (400 MHz,  $\text{CDCl}_3$ ):

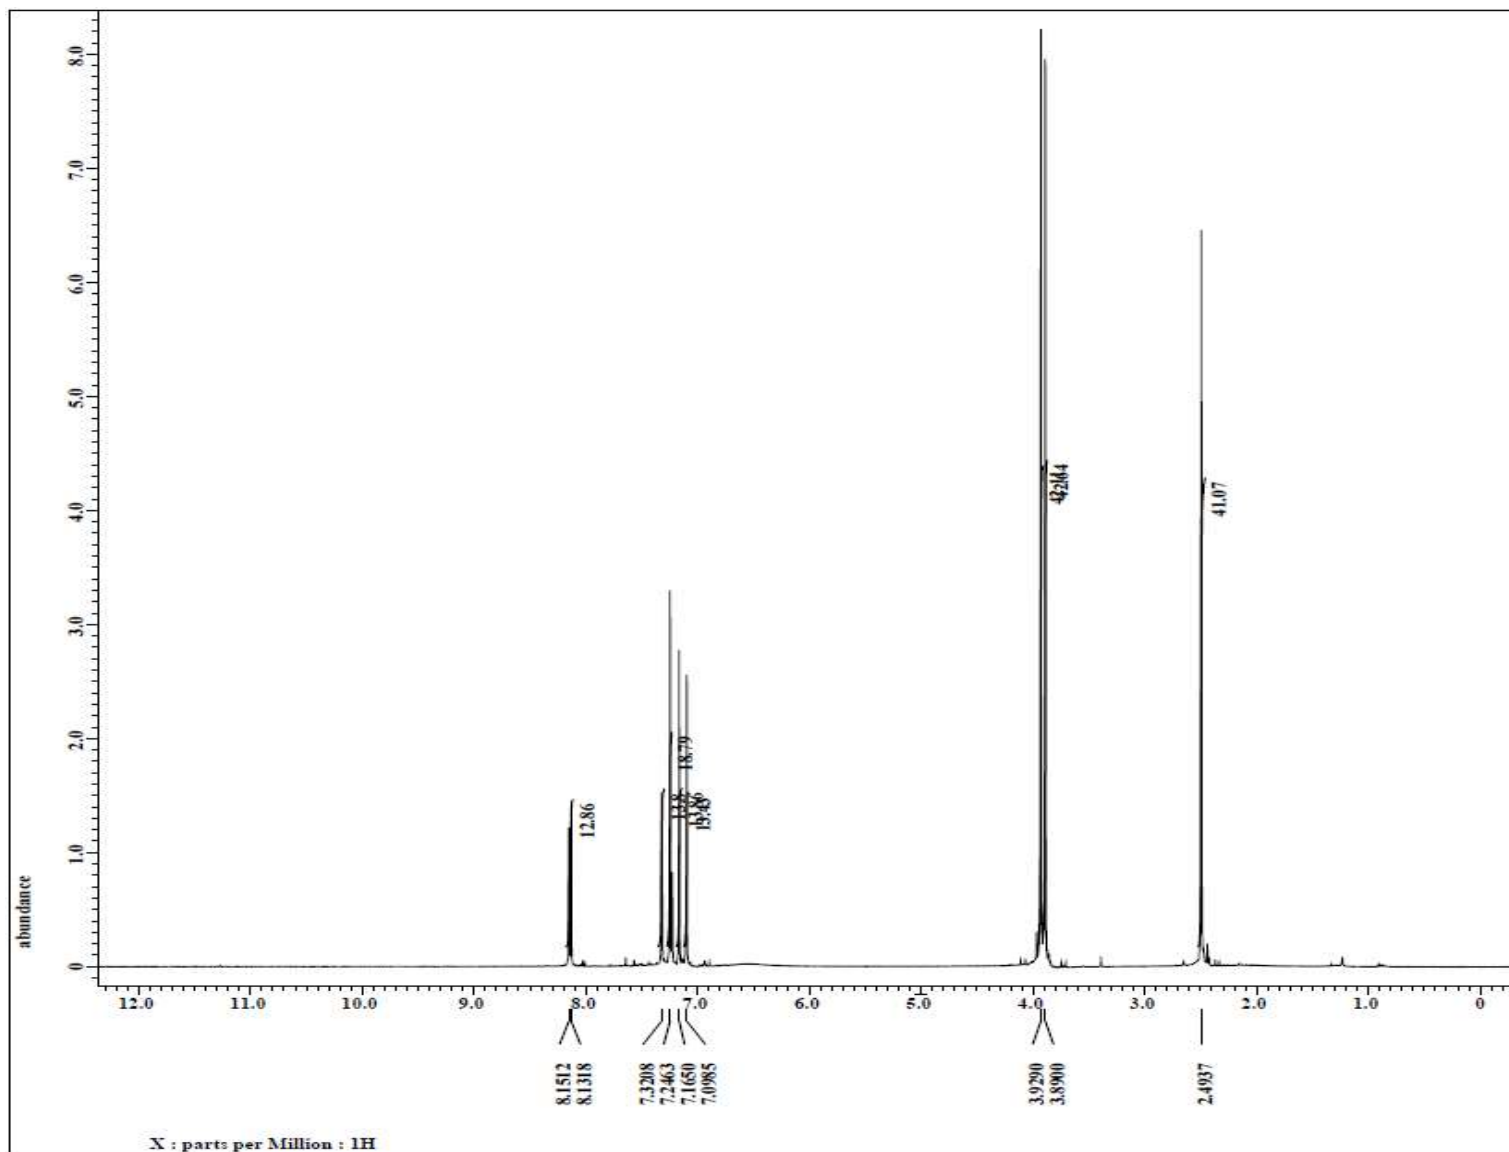

2-(2-Bromo-3,4-dimethoxyphenyl)-3-hydroxy-7-methyl-4H-chromen-4-one (F10):  $^{13}\text{C}$ -NMR (100 MHz;  $\text{CDCl}_3$ )

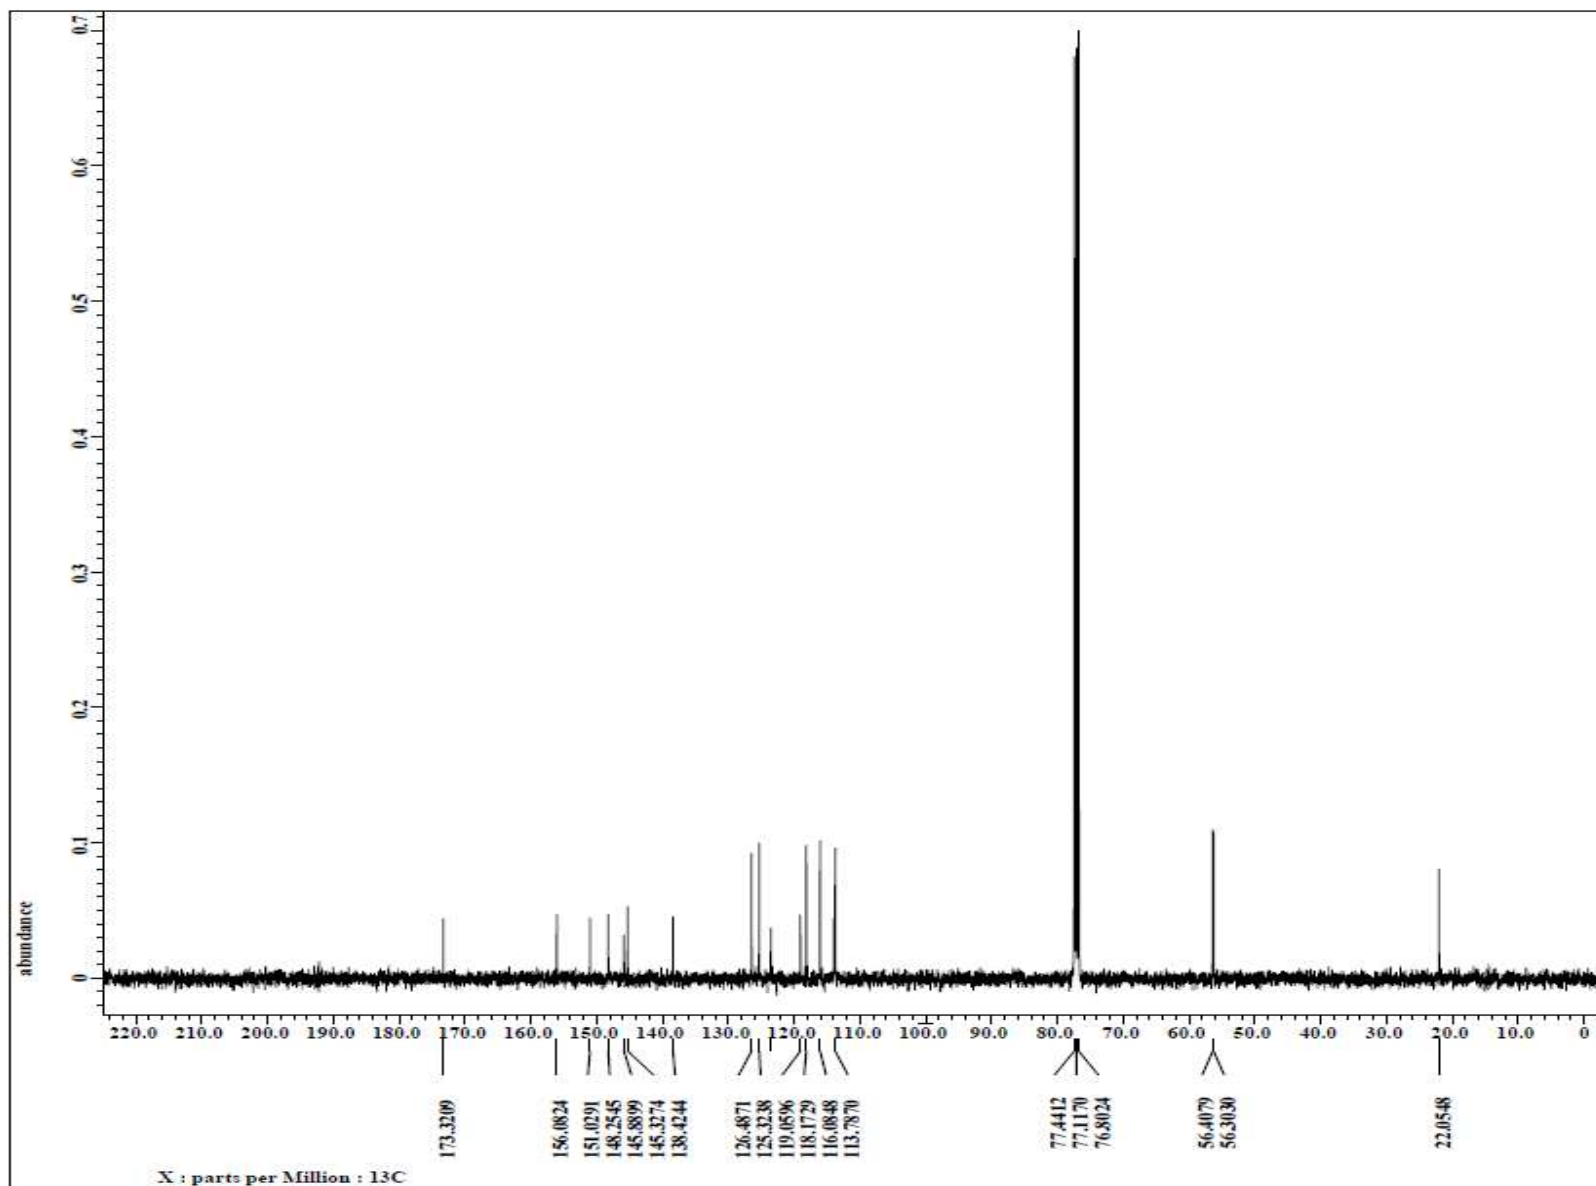

**2-(2-Bromo-3,4-dimethoxyphenyl)-3-hydroxy-7-methyl-4H-chromen-4-one (F10): HRMS (ESI)**

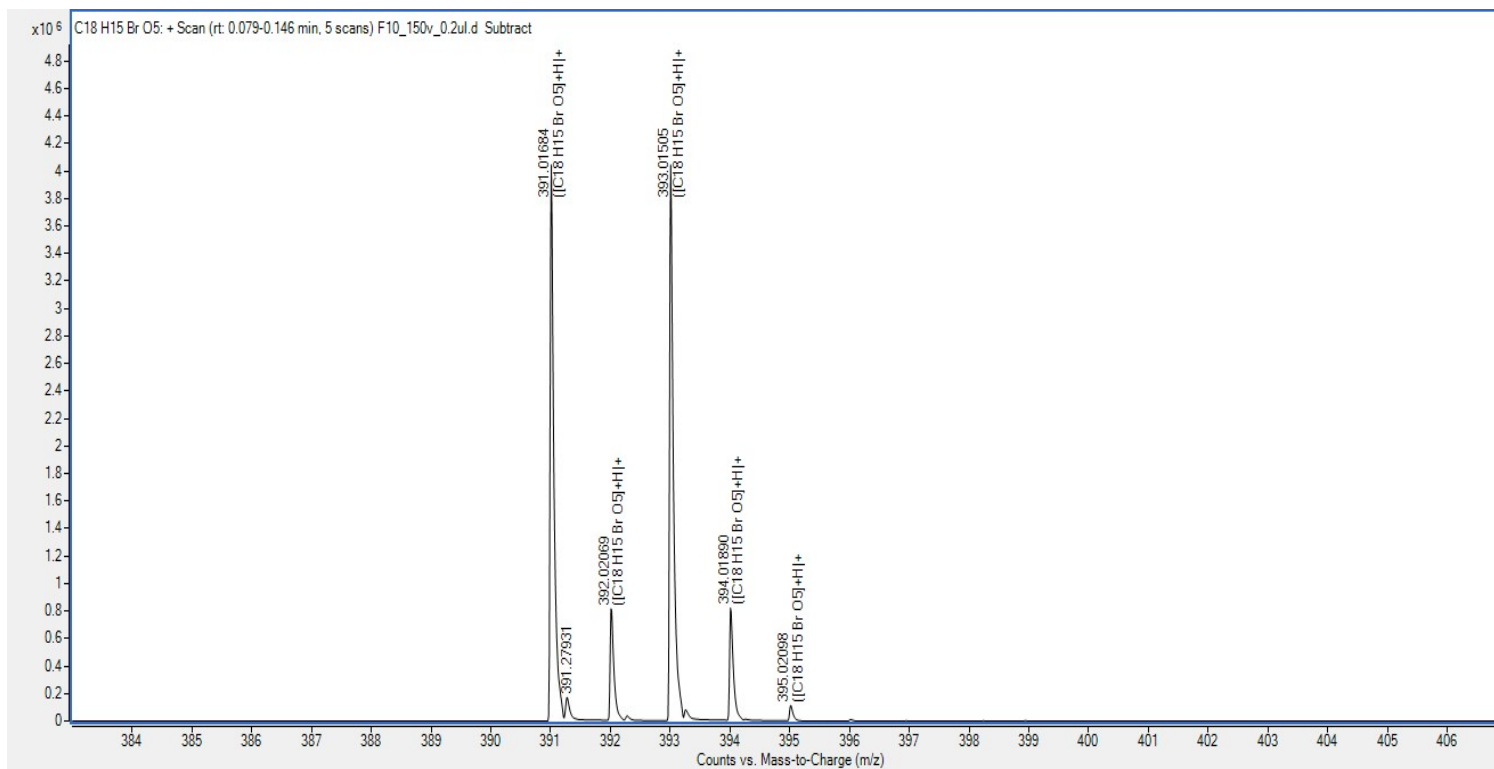

| Species,              | Calc m/z  | Formula,                                            | Species,             | m/z,              | Score, | Diff (abs. ppm), | Mass      |
|-----------------------|-----------|-----------------------------------------------------|----------------------|-------------------|--------|------------------|-----------|
| M <sup>+</sup> ,      | 390.00974 |                                                     |                      |                   |        |                  |           |
| (M+H) <sup>+</sup> ,  | 391.01756 |                                                     |                      |                   |        |                  |           |
| (M+Na) <sup>+</sup> , | 412.99951 | C <sub>18</sub> H <sub>15</sub> Br O <sub>5</sub> , | (M+H) <sup>+</sup> , | <b>391.01684,</b> | 98.53, | 1.58,            | 390.01029 |
| (M+K) <sup>+</sup> ,  | 428.97344 |                                                     |                      |                   |        |                  |           |

2-(4-(Tert-butyl)phenyl)-3-hydroxy-7-methyl-4H-chromen-4-one (F11):  $^1\text{H-NMR}$  (400 MHz,  $\text{CDCl}_3$ ):

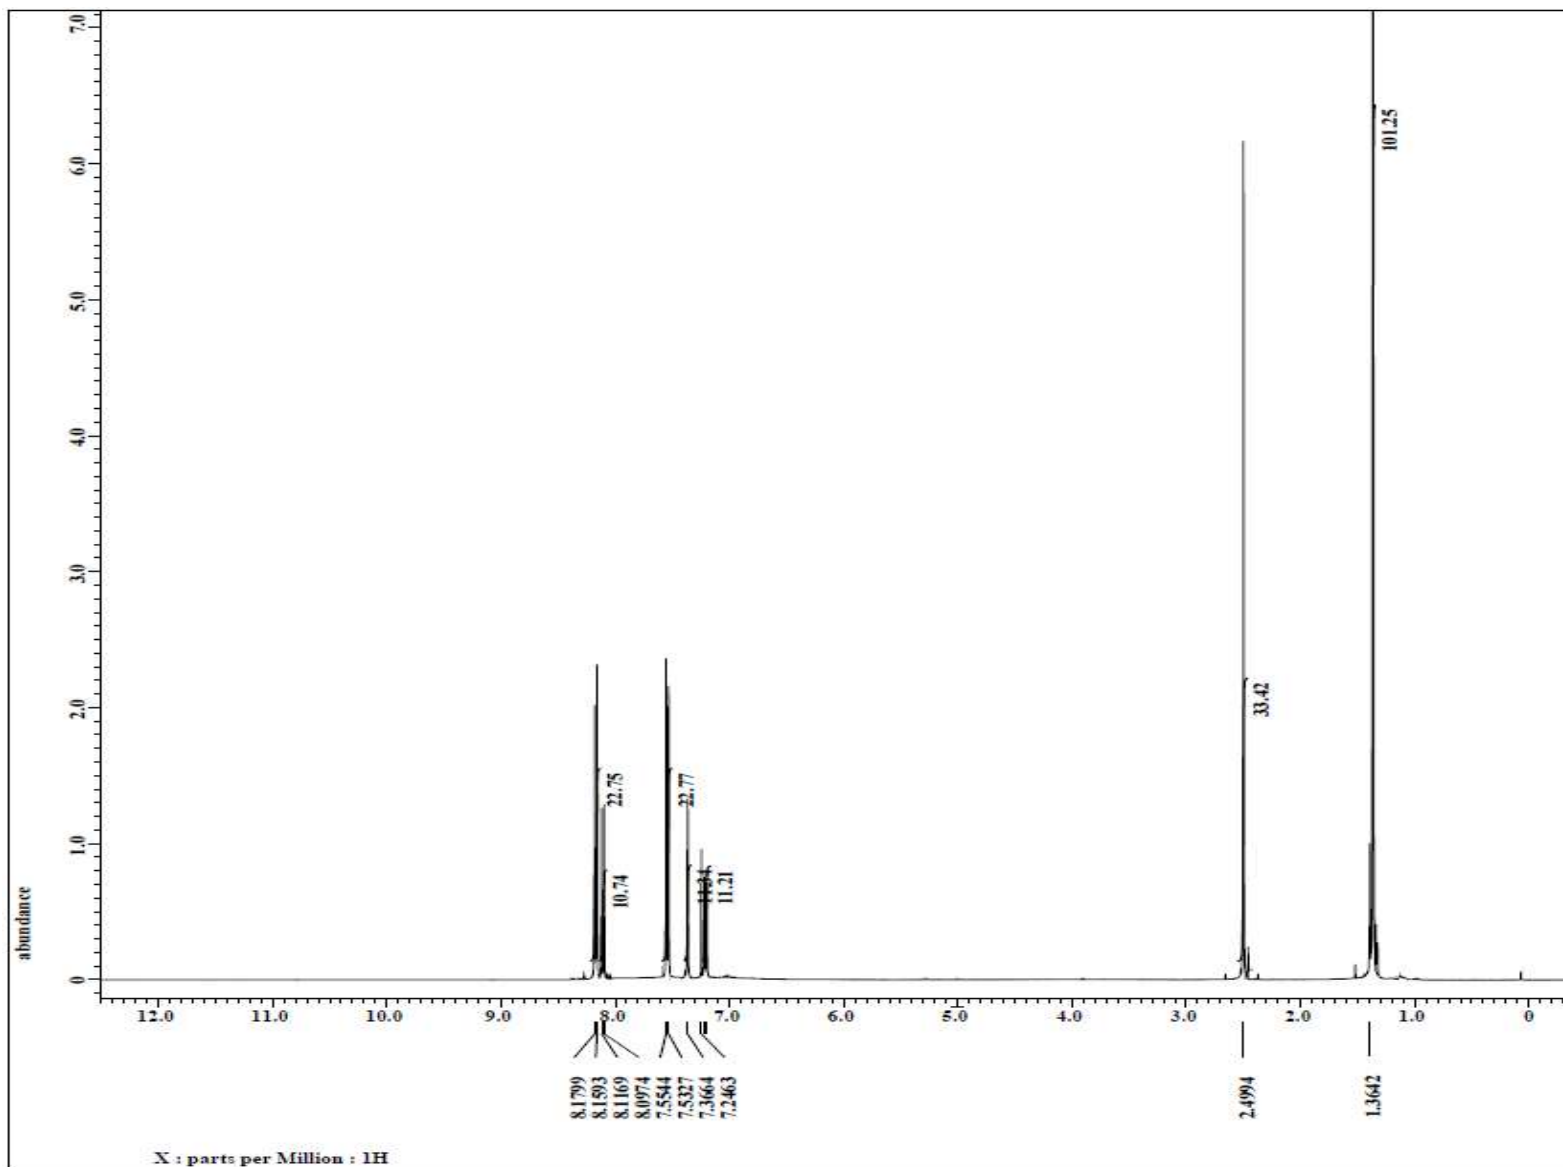

2-(4-(Tert-butyl)phenyl)-3-hydroxy-7-methyl-4H-chromen-4-one (F11):  $^{13}\text{C}$ -NMR (100 MHz;  $\text{CDCl}_3$ )

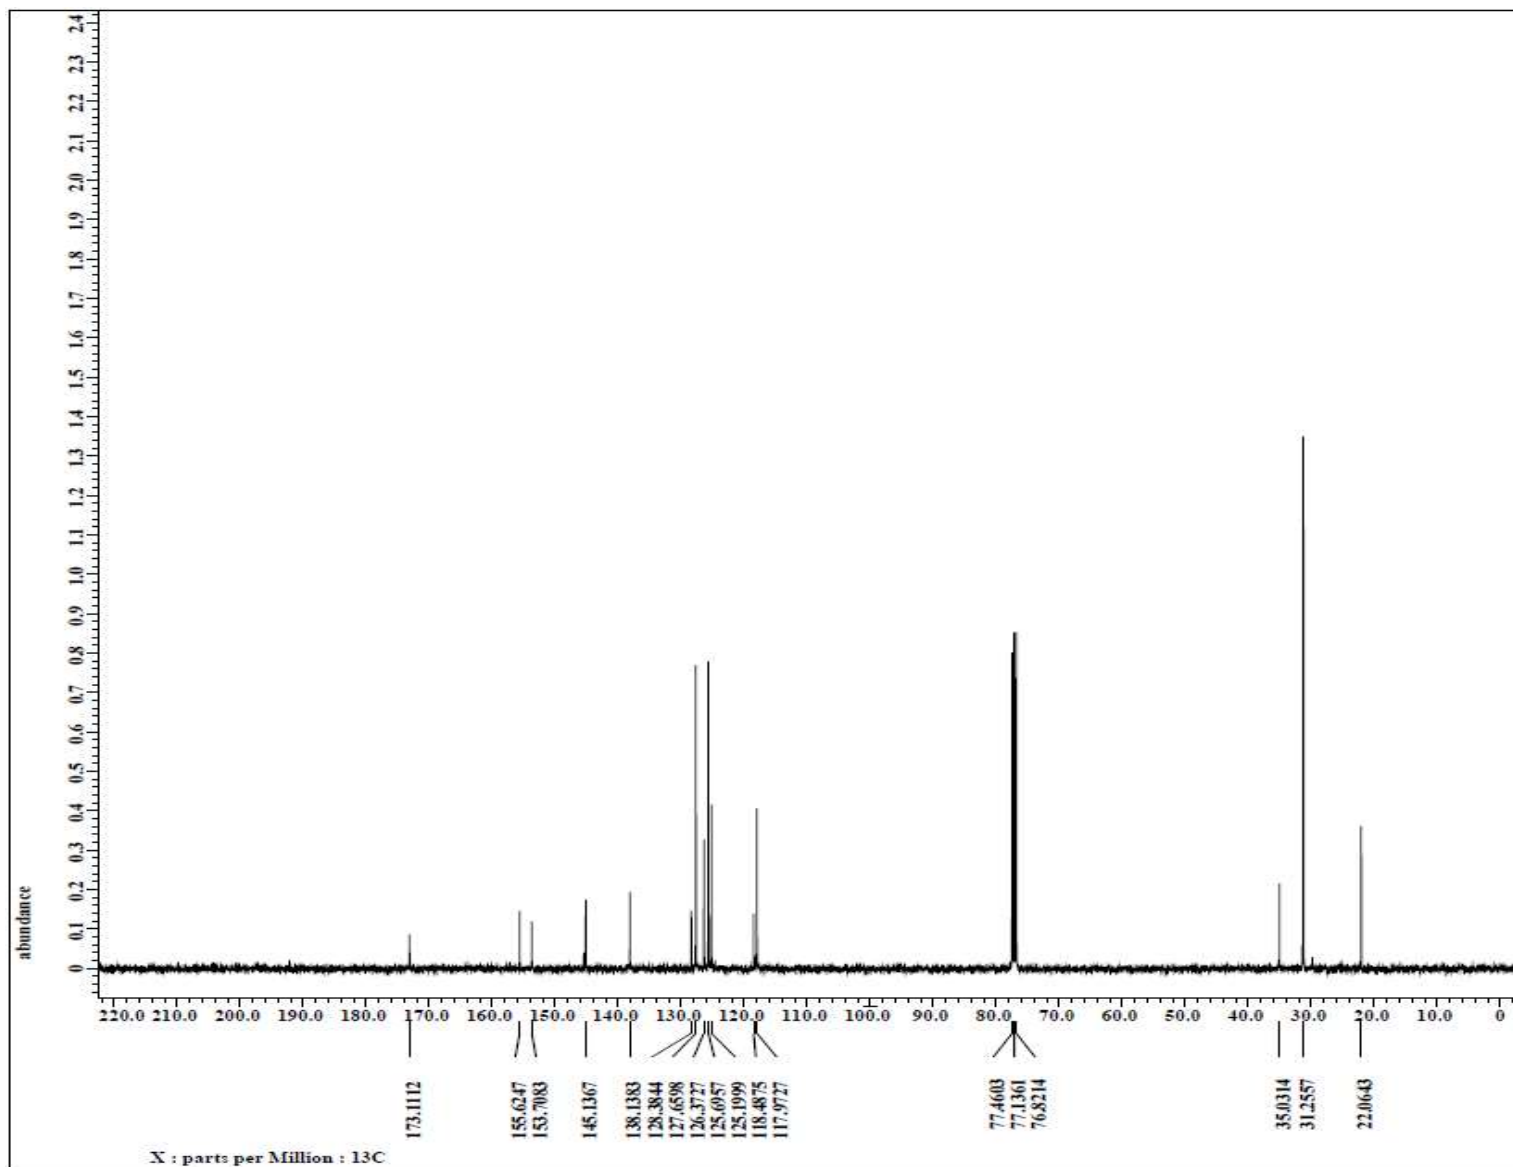



**2-(4-(Tert-butyl)phenyl)-3-hydroxy-7-methyl-4H-chromen-4-one (F11): HRMS (ESI)**

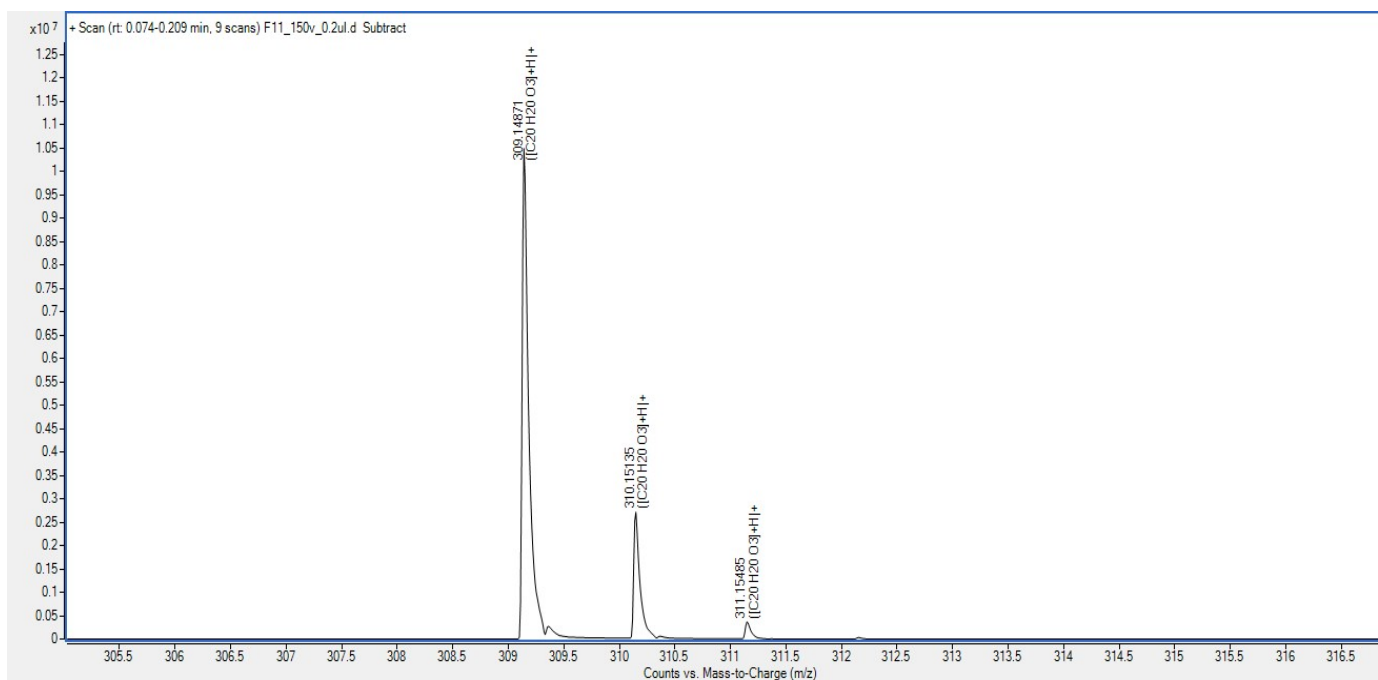

**Species, Calc m/z**

M+, 308.1407

(M+H)+, 309.14852

(M+Na)+, 331.13047

(M+K)+, 347.1044

| Formula                                        | Species       | m/z              | Score | Diff (abs. ppm) | Mass      |
|------------------------------------------------|---------------|------------------|-------|-----------------|-----------|
| C <sub>20</sub> H <sub>20</sub> O <sub>3</sub> | <b>(M+H)+</b> | <b>309.14871</b> | 96.46 | 0.12            | 308.14124 |

2-(4-Bromophenyl)-3-hydroxy-7-methoxy-4H-chromen-4-one (F12):  $^1\text{H-NMR}$  (400 MHz,  $\text{CDCl}_3$ ):

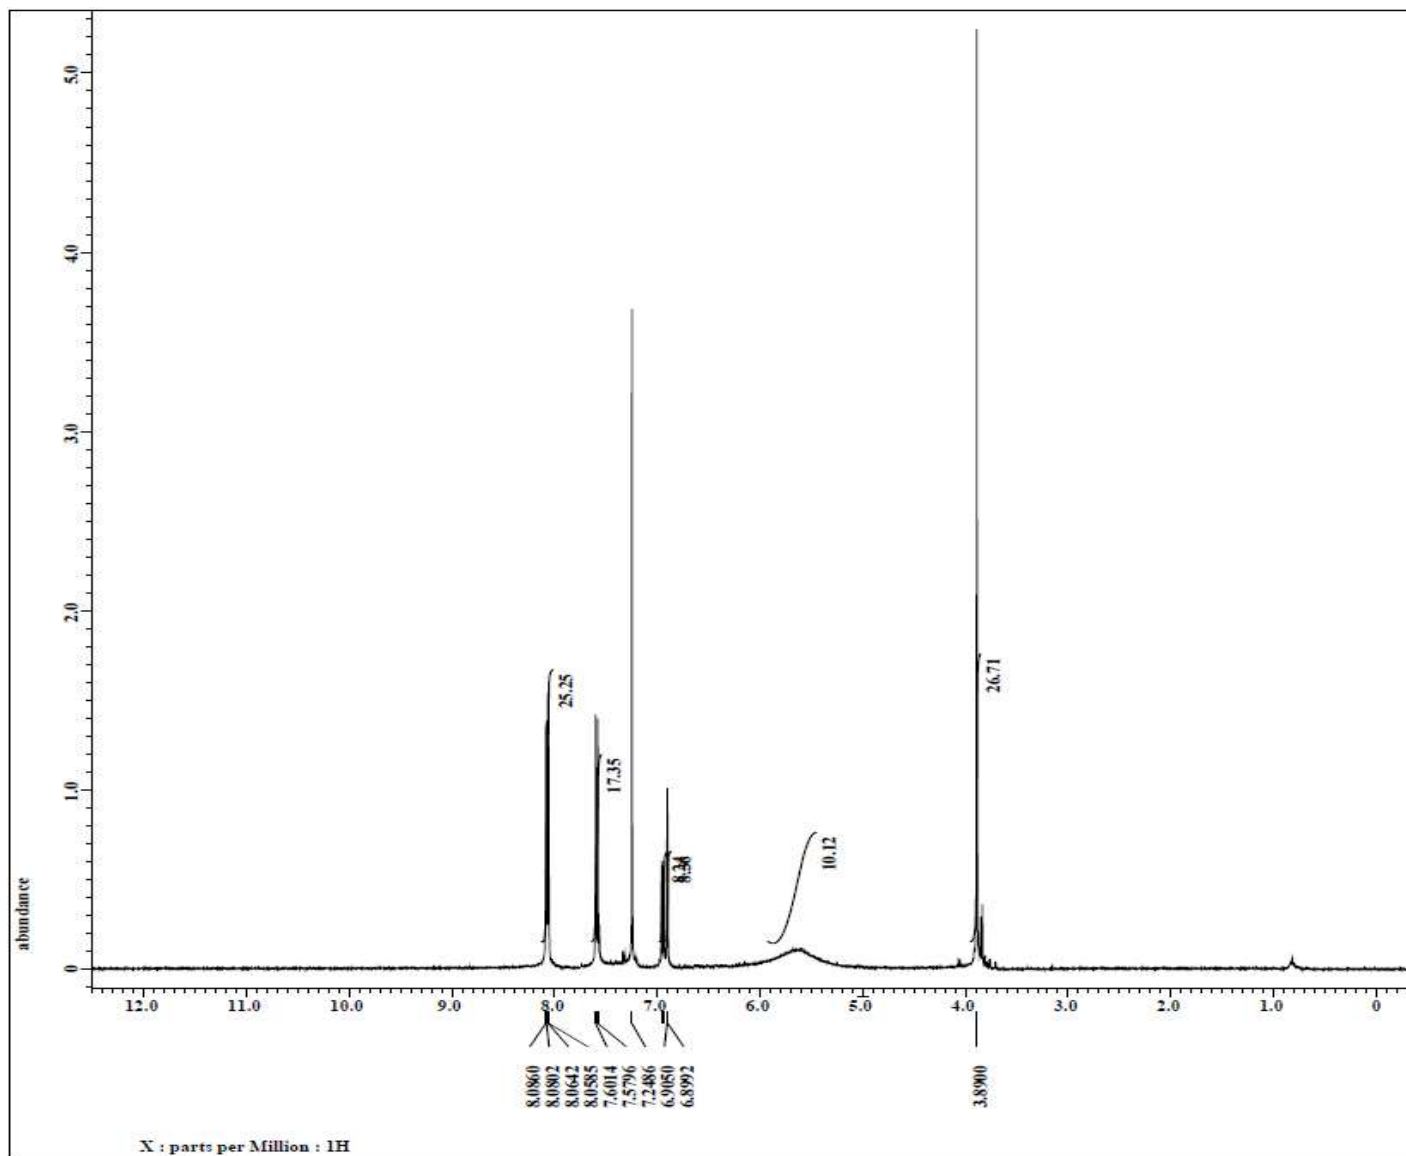

2-(4-Bromophenyl)-3-hydroxy-7-methoxy-4H-chromen-4-one (F12):  $^{13}\text{C}$ -NMR (100 MHz;  $\text{CDCl}_3$  and  $\text{DMSO-d}_6$ )

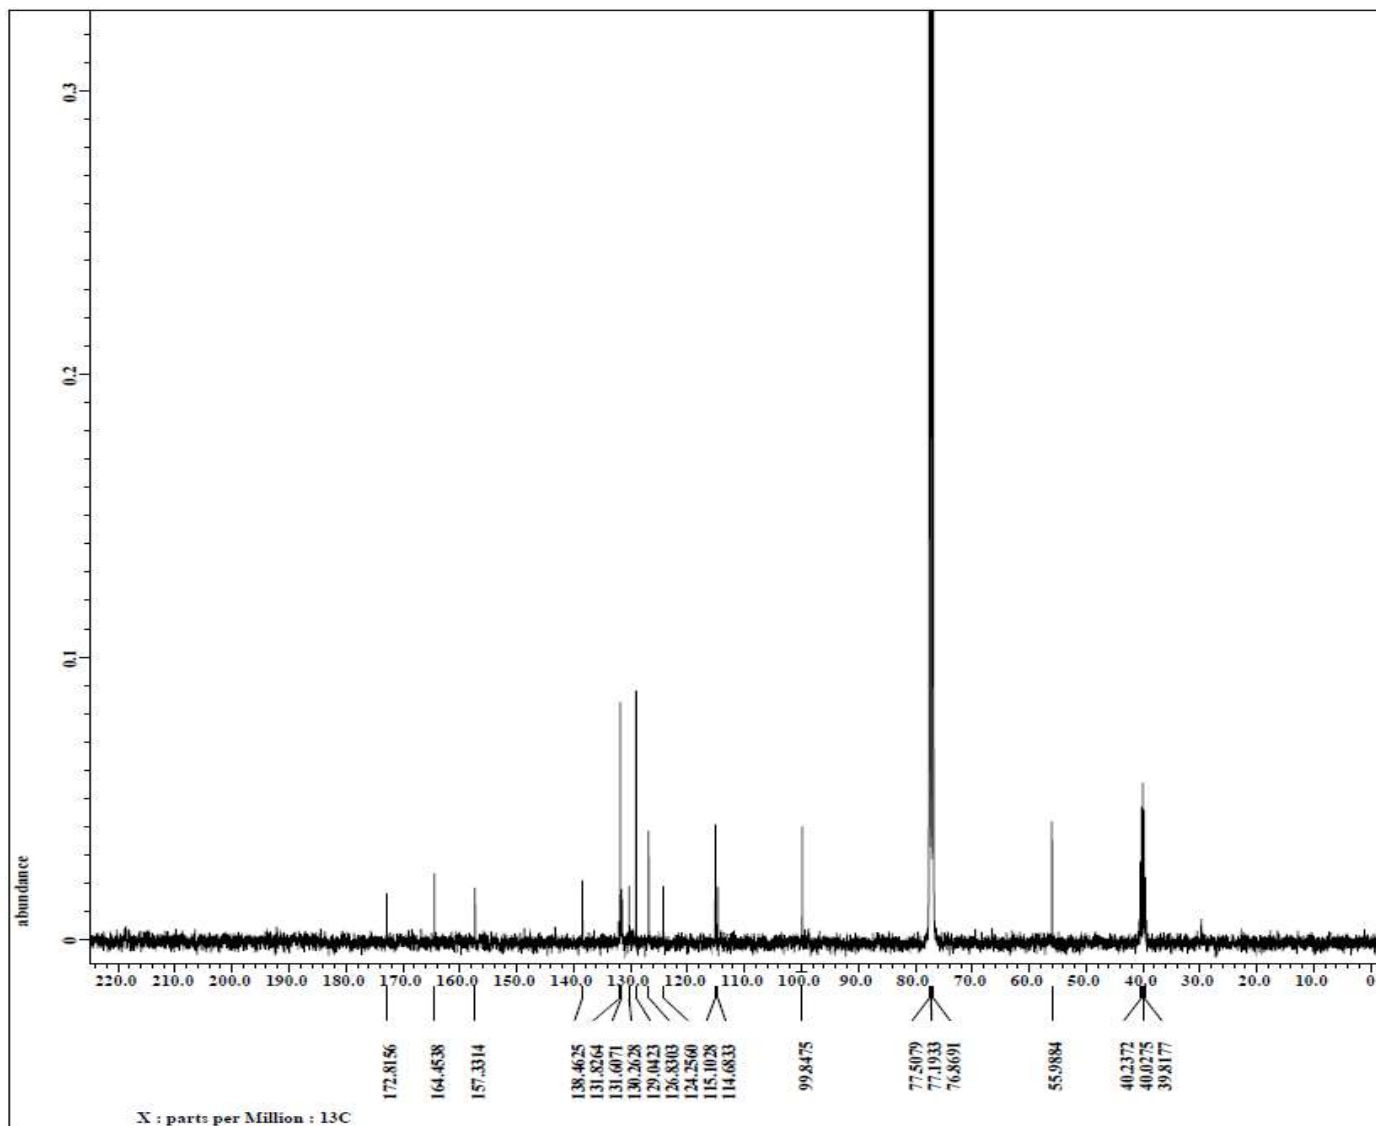

## 2-(4-Bromophenyl)-3-hydroxy-7-methoxy-4H-chromen-4-one (F12): HRMS (ESI)

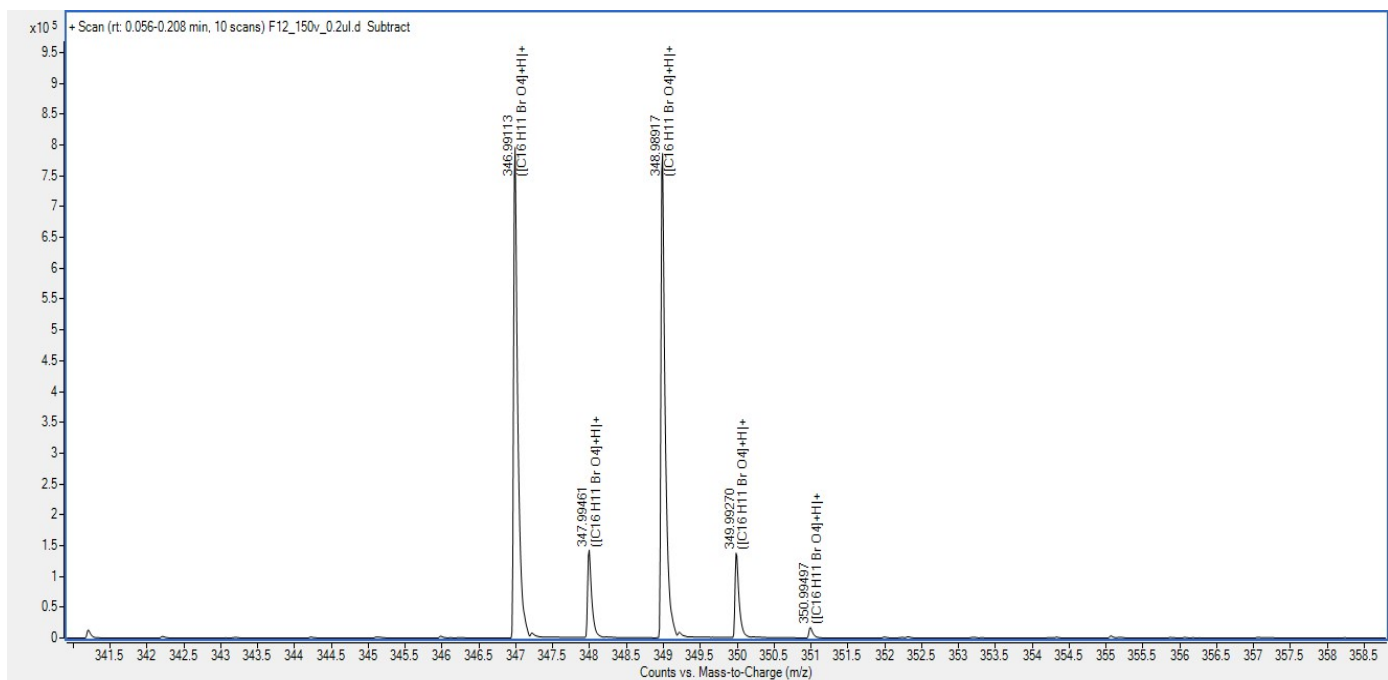

| Species, | Calc m/z  | Formula,       | Species, | m/z,       | Score, | Diff (abs. ppm), | Mass      |
|----------|-----------|----------------|----------|------------|--------|------------------|-----------|
| M+,      | 345.98352 |                |          |            |        |                  |           |
| (M+H)+,  | 346.99135 |                |          |            |        |                  |           |
| (M+Na)+, | 368.97329 | C16 H11 Br O4, | (M+H)+,  | 346.99113, | 99.77, | 0.69,            | 345.98407 |
| (M+K)+,  | 384.94723 |                |          |            |        |                  |           |

2-(4-(Tert-butyl)phenyl)-3-hydroxy-7-methoxy-4H-chromen-4-one (F13):  $^1\text{H-NMR}$  (400 MHz,  $\text{CDCl}_3$ ):

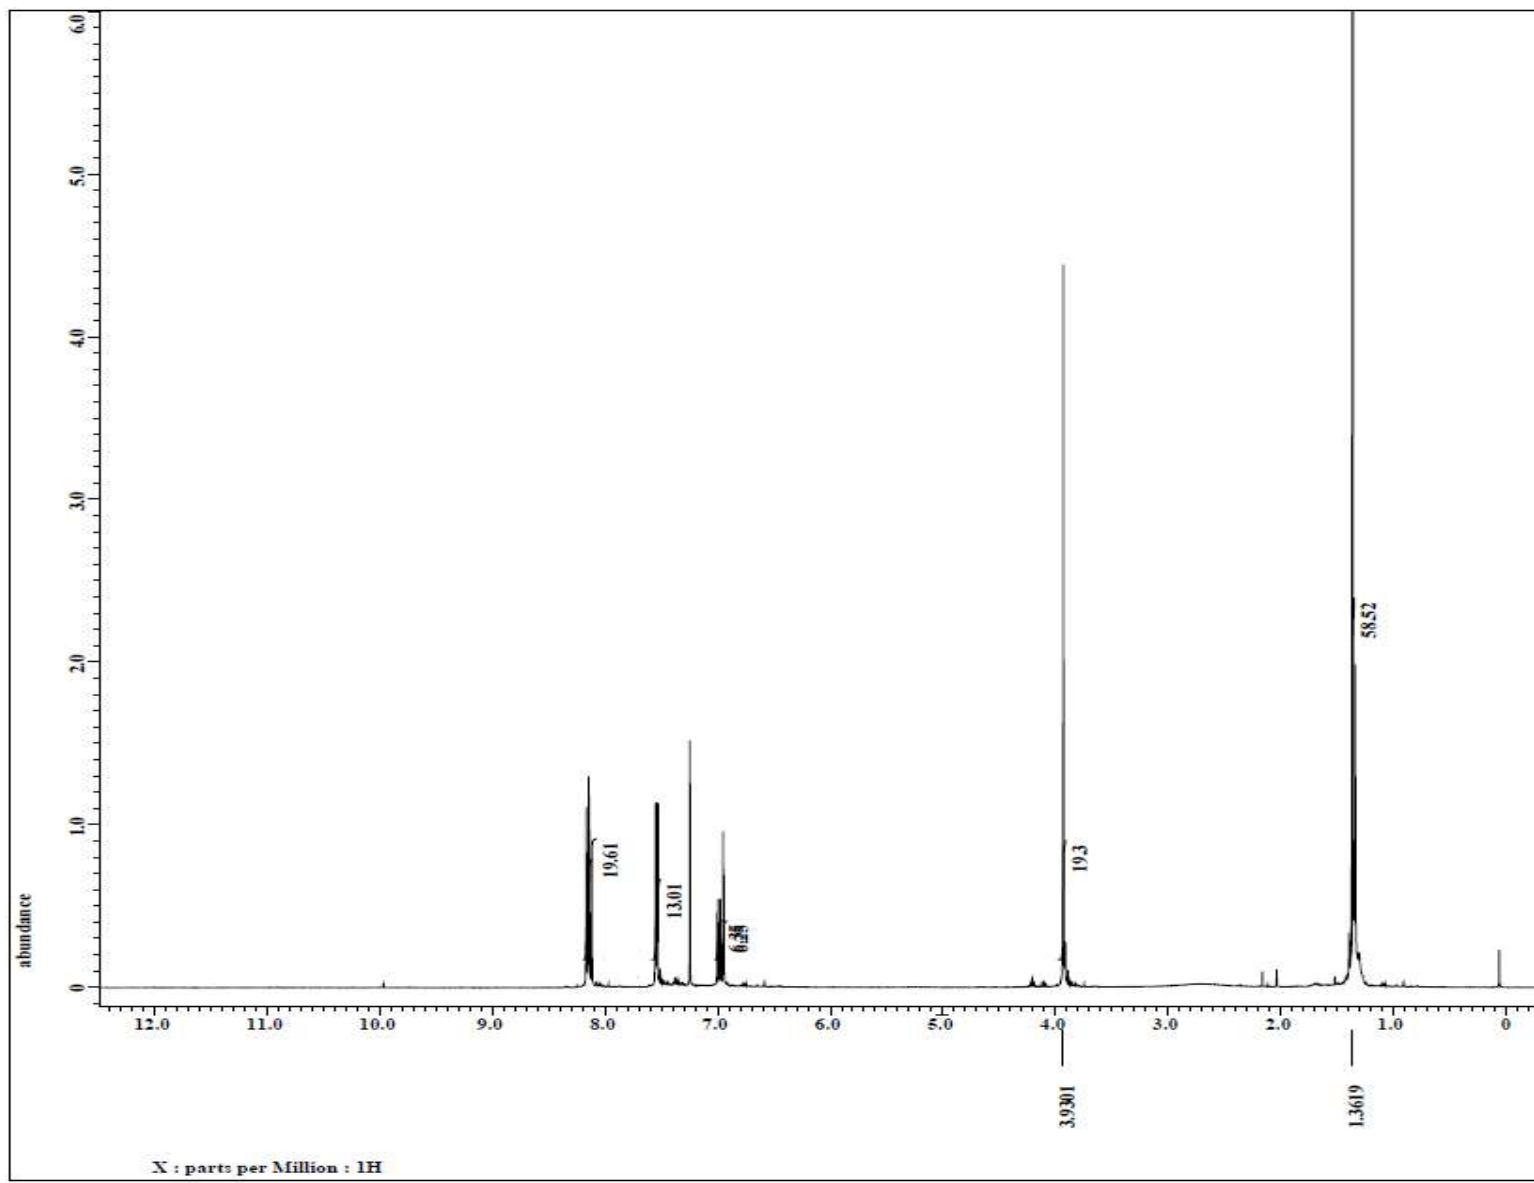

2-(4-(Tert-butyl)phenyl)-3-hydroxy-7-methoxy-4H-chromen-4-one (F13):  $^{13}\text{C}$ -NMR (100 MHz;  $\text{CDCl}_3$ )

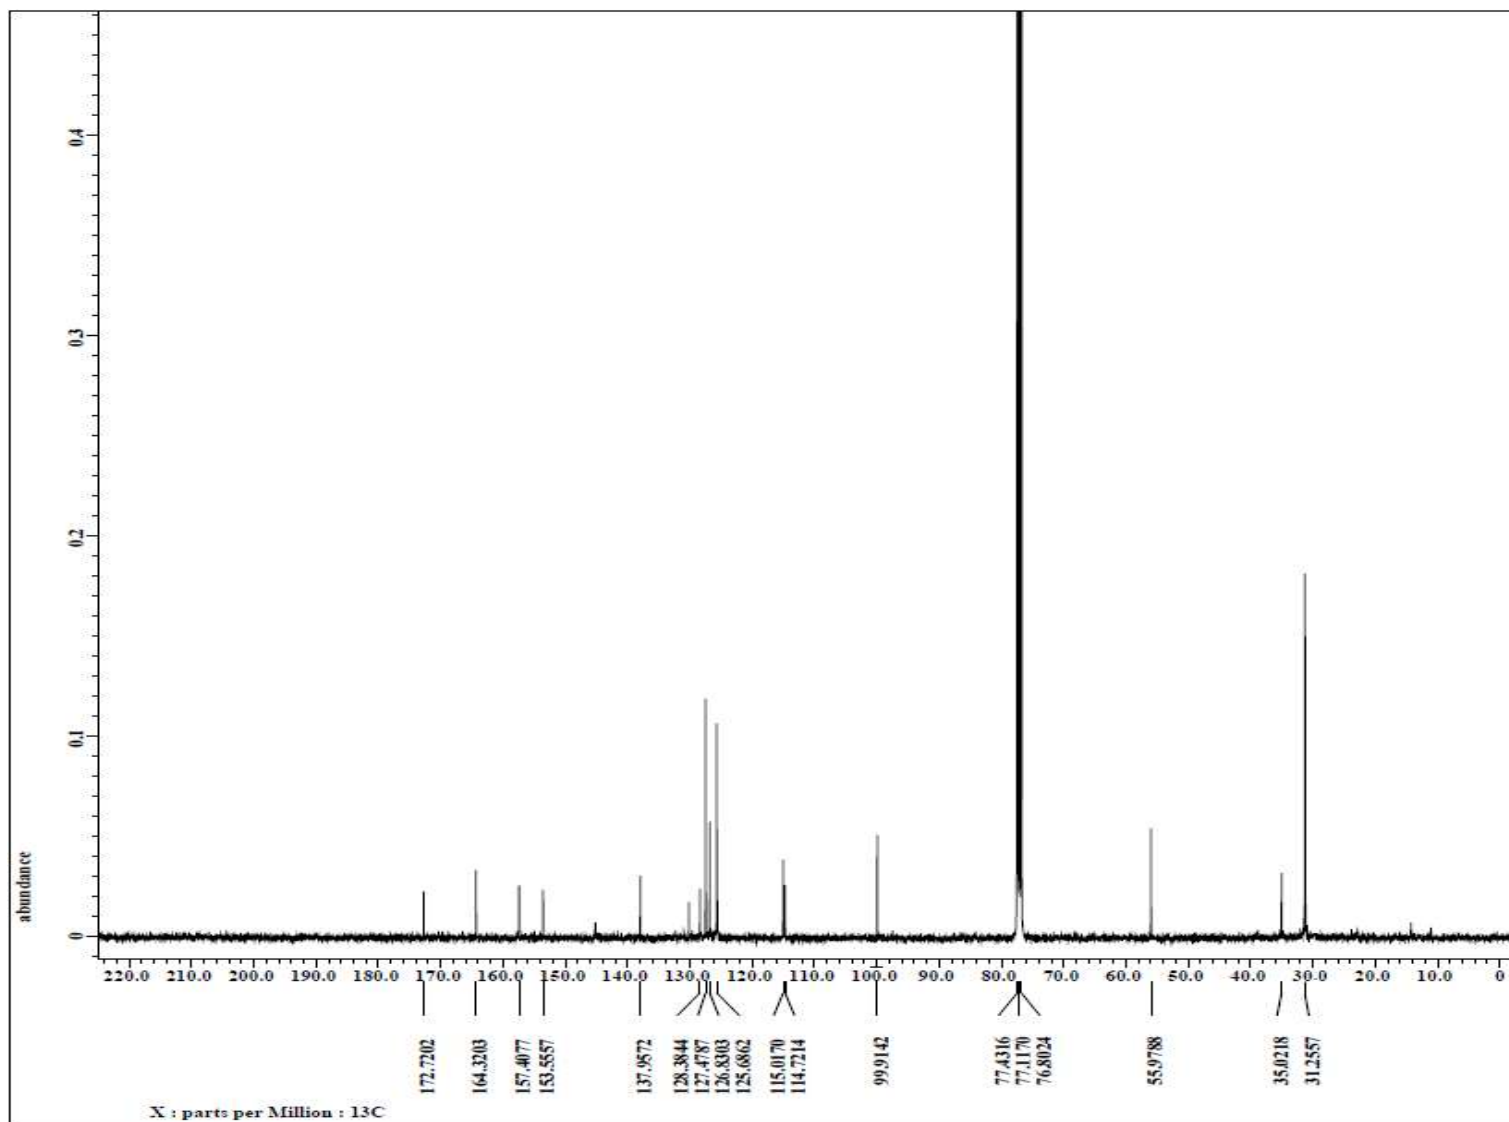

7-Bromo-3-hydroxy-2-phenyl-4H-chromen-4-one (F14):  $^1\text{H-NMR}$  (400 MHz,  $\text{CDCl}_3$ ):

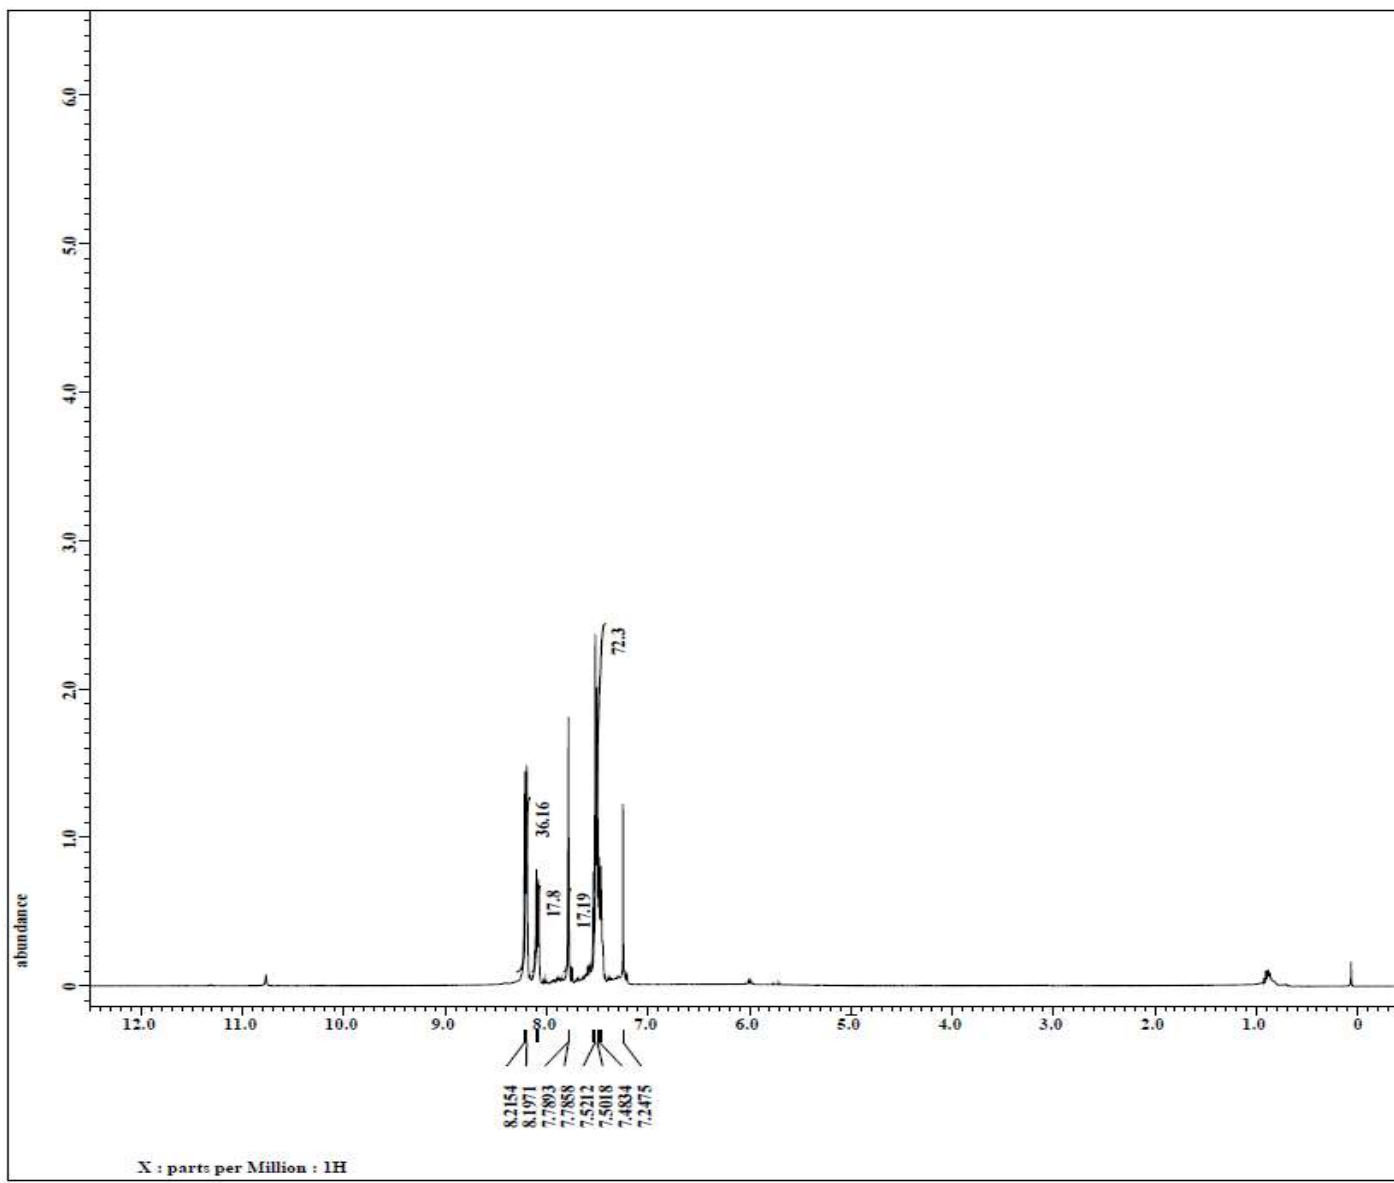

7-Bromo-3-hydroxy-2-phenyl-4H-chromen-4-one (F14):  $^{13}\text{C}$ -NMR (100 MHz;  $\text{CDCl}_3$ )

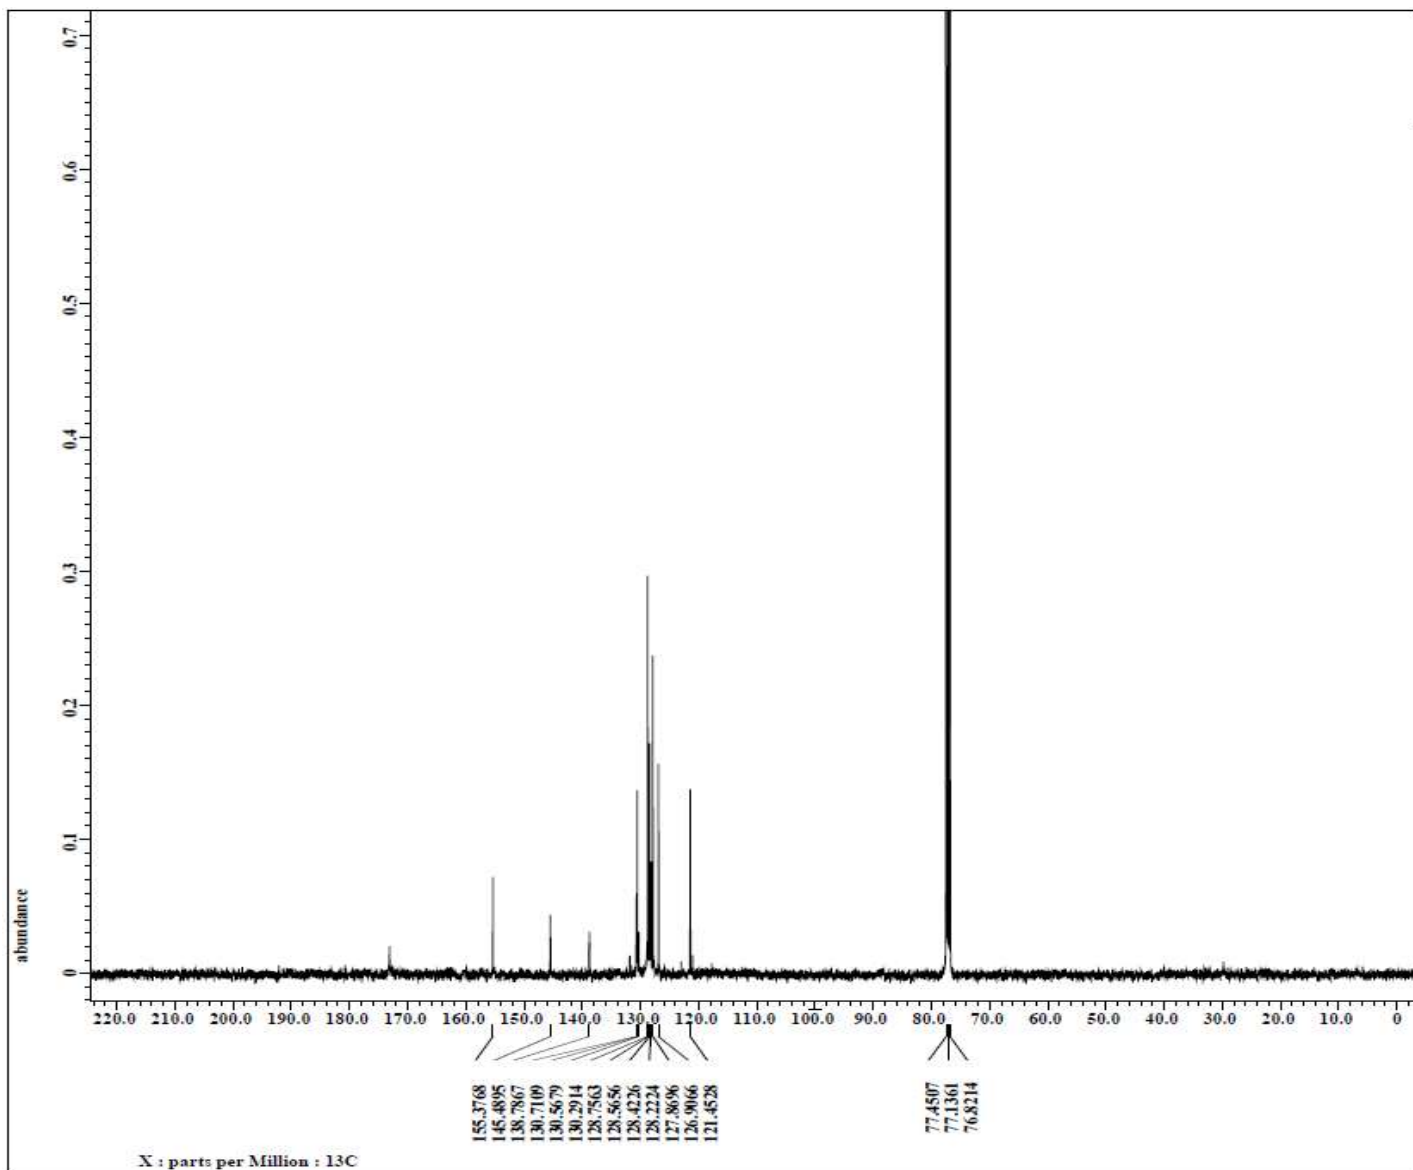



### 7-Bromo-3-hydroxy-2-phenyl-4H-chromen-4-one (F14): HRMS (ESI)

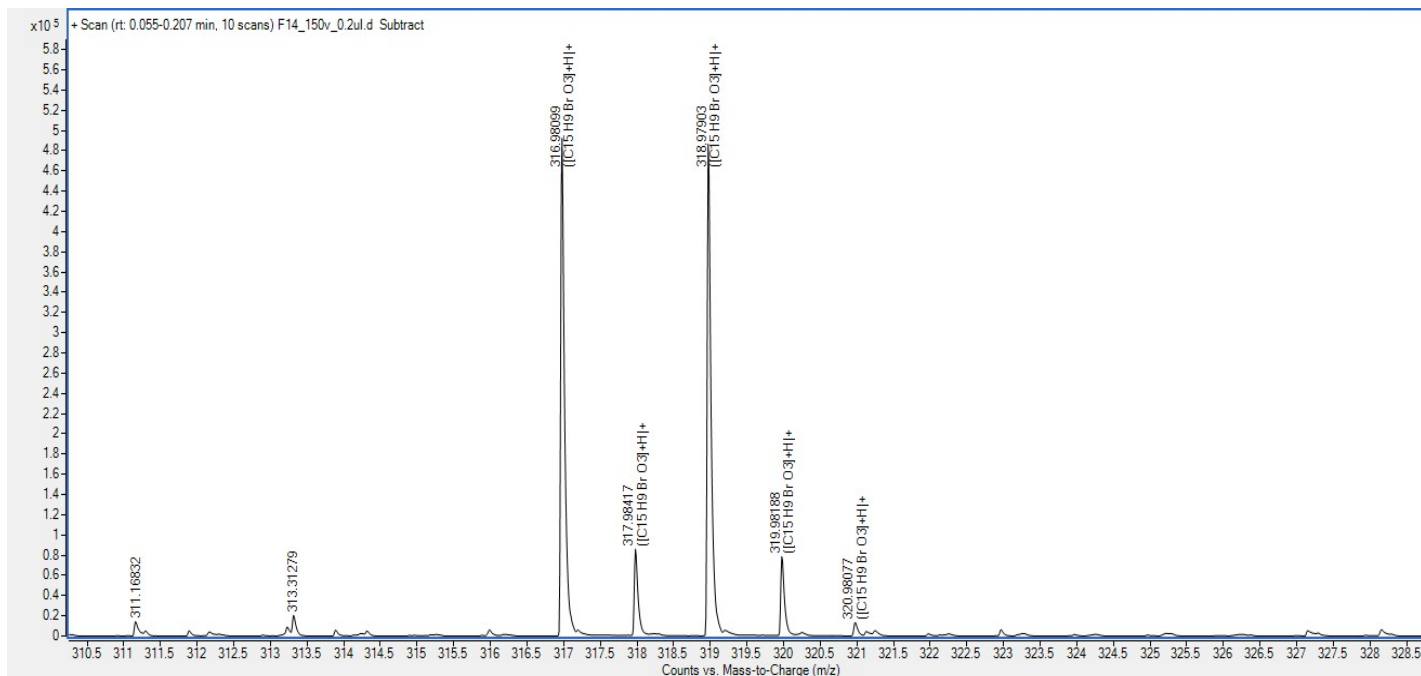

| Species, | Calc m/z  | Formula,      | Species,       | m/z,              | Score, | Diff (abs. ppm), | Mass      |
|----------|-----------|---------------|----------------|-------------------|--------|------------------|-----------|
| M+,      | 315.97296 |               |                |                   |        |                  |           |
| (M+H)+,  | 316.98078 | C15 H9 Br O3, | <b>(M+H)+,</b> | <b>316.98099,</b> | 99.61, | 0.21,            | 315.97351 |
| (M+Na)+, | 338.96273 |               |                |                   |        |                  |           |
| (M+K)+,  | 354.93667 |               |                |                   |        |                  |           |

7-Bromo-3-hydroxy-2-(3-methoxyphenyl)-4H-chromen-4-one (F15):  $^1\text{H-NMR}$  (400 MHz,  $\text{CDCl}_3$ ):

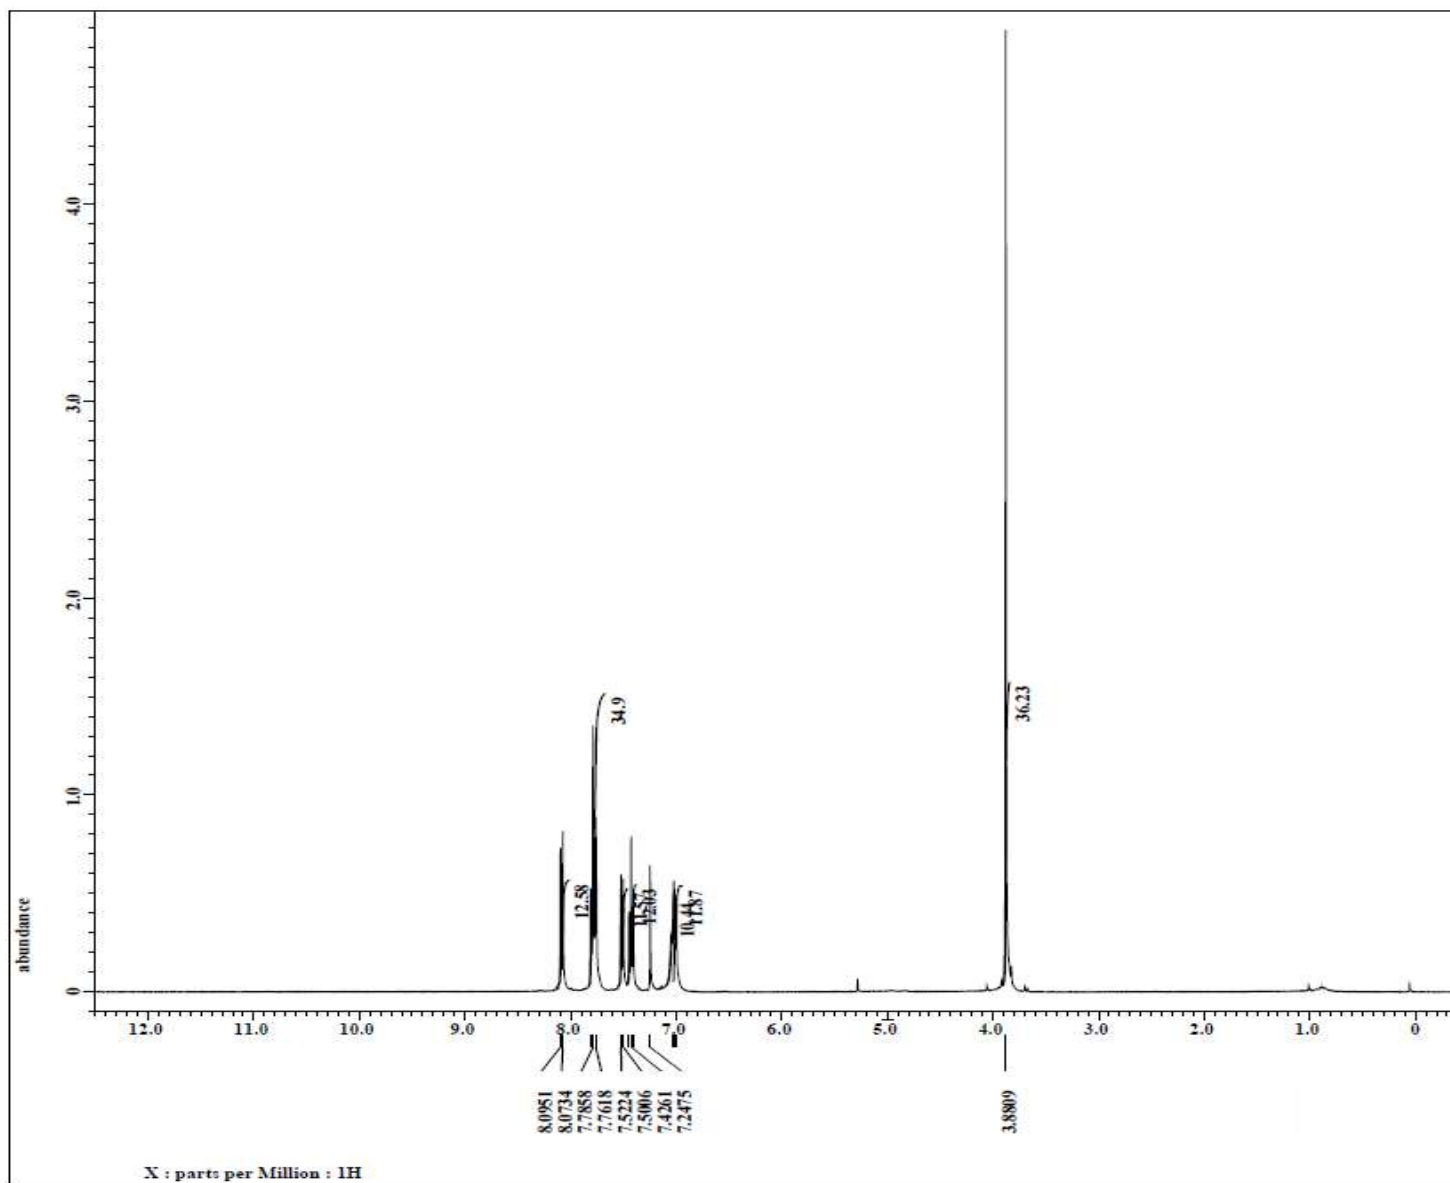

7-Bromo-3-hydroxy-2-(3-methoxyphenyl)-4H-chromen-4-one (F15):  $^{13}\text{C}$ -NMR (100 MHz;  $\text{CDCl}_3$ )

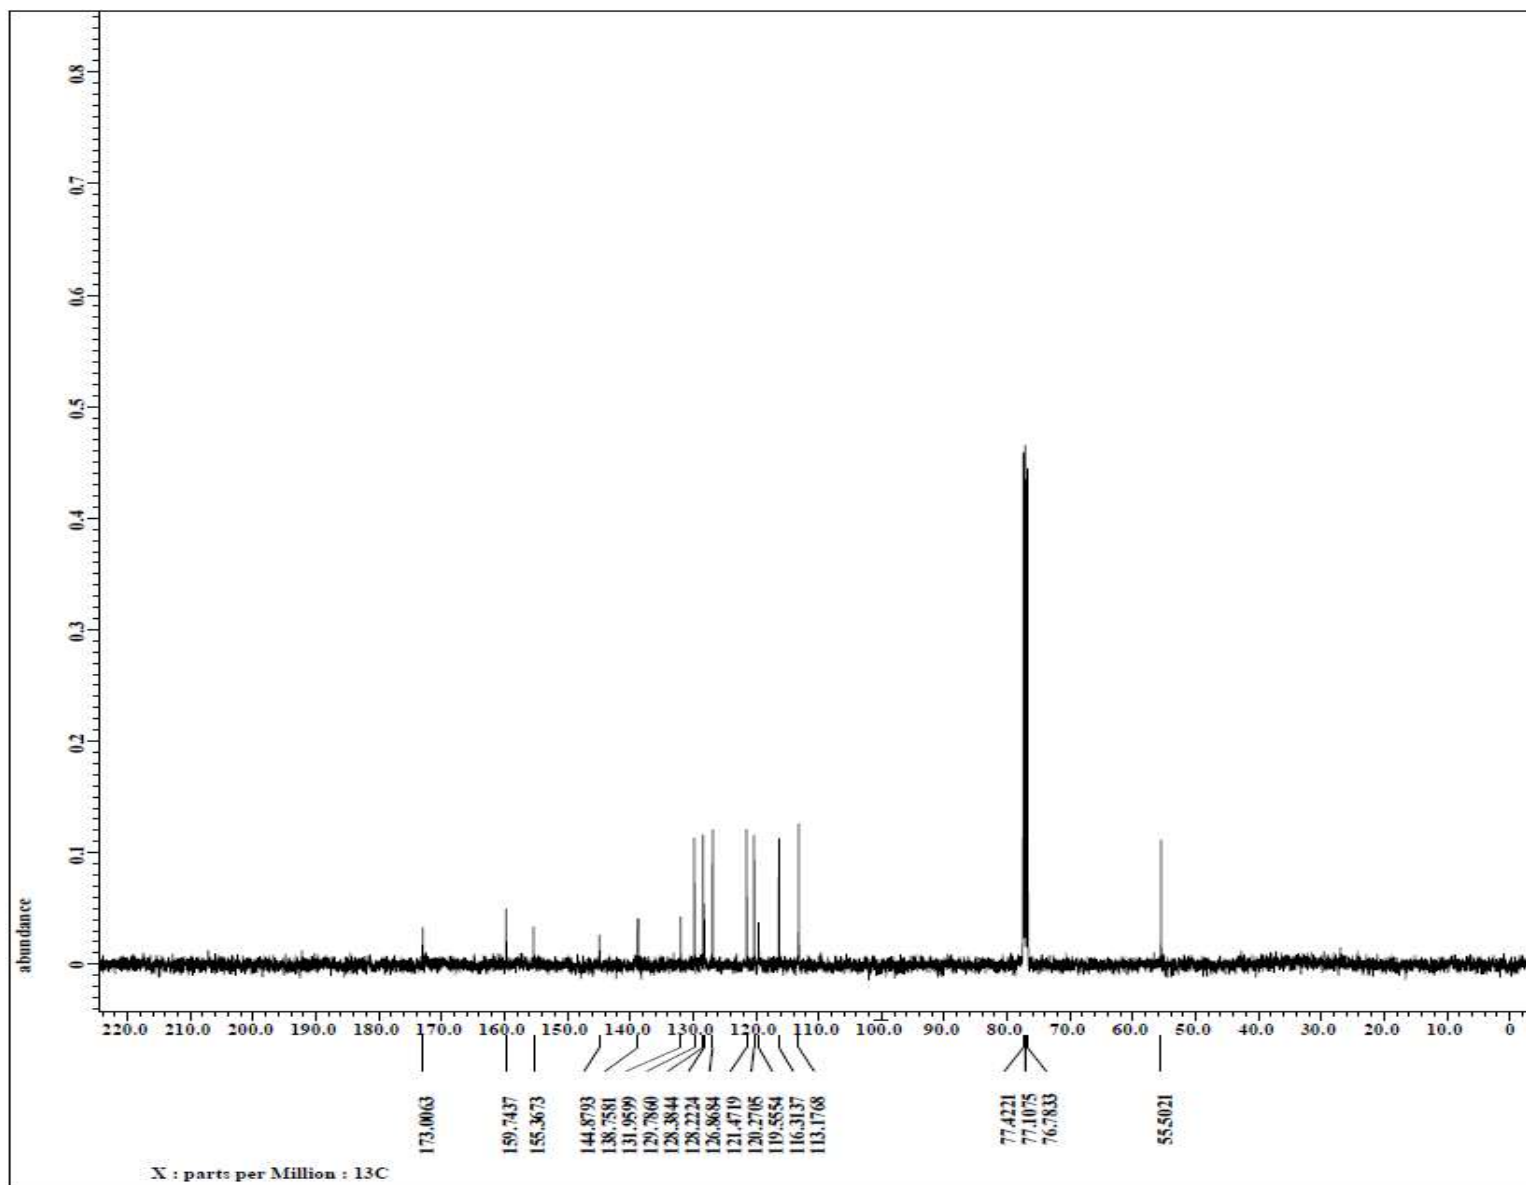

**7-Bromo-3-hydroxy-2-(3-methoxyphenyl)-4H-chromen-4-one (F15): HRMS (ESI)**

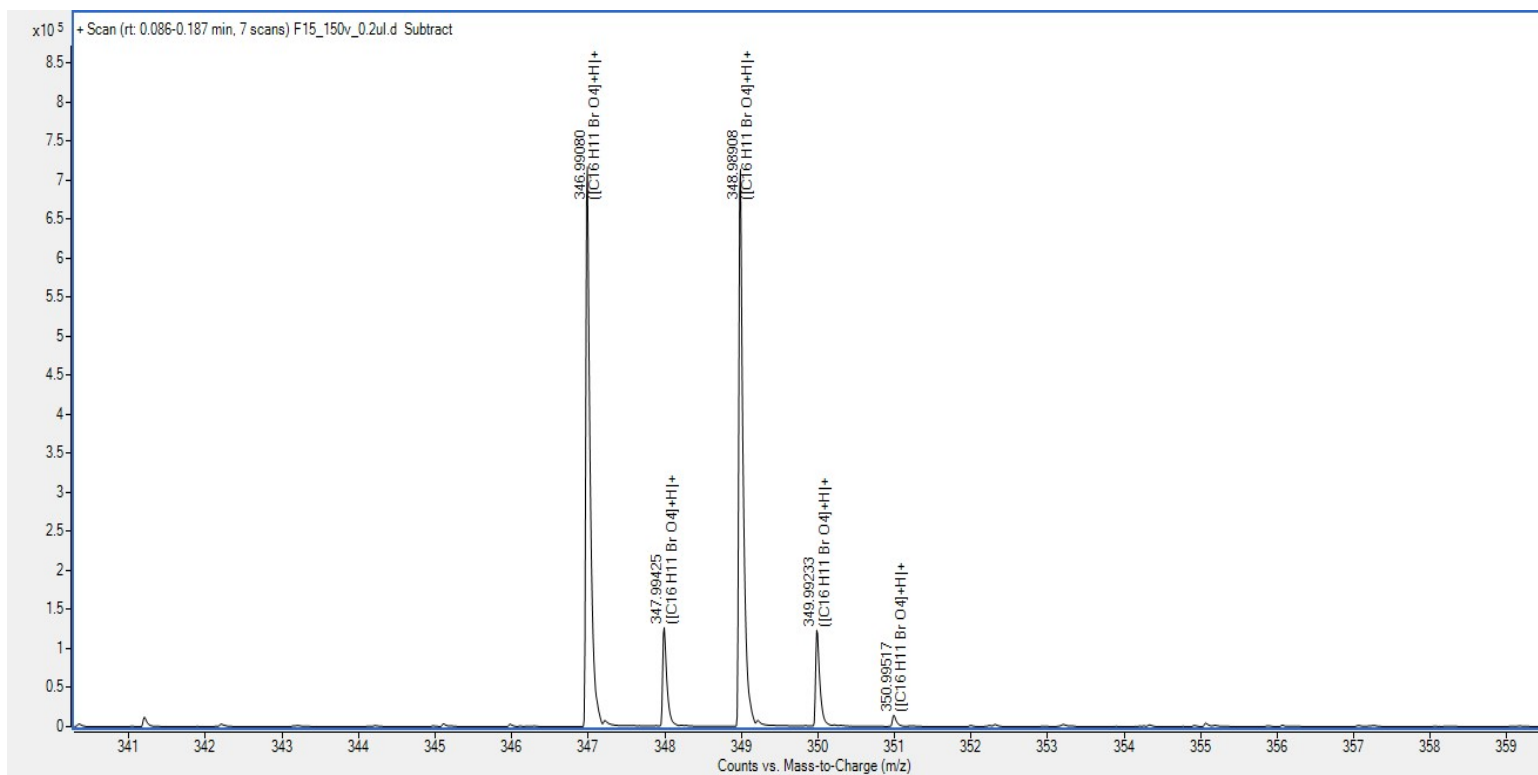

| Species,              | Calc m/z  | Formula,                                           | Species,                  | m/z,              | Score, | Diff (abs. ppm), | Mass      |
|-----------------------|-----------|----------------------------------------------------|---------------------------|-------------------|--------|------------------|-----------|
| M <sup>+</sup> ,      | 345.98352 |                                                    |                           |                   |        |                  |           |
| (M+H) <sup>+</sup> ,  | 346.99135 | C <sub>16</sub> H <sub>11</sub> BrO <sub>4</sub> , | <b>(M+H)<sup>+</sup>,</b> | <b>346.99080,</b> | 99.29, | 1.36,            | 345.98407 |
| (M+Na) <sup>+</sup> , | 368.97329 |                                                    |                           |                   |        |                  |           |
| (M+K) <sup>+</sup> ,  | 384.94723 |                                                    |                           |                   |        |                  |           |

6-Bromo-2-(3,4-dimethoxyphenyl)-3-hydroxy-4H-chromen-4-one (F16):  $^1\text{H-NMR}$  (400 MHz,  $\text{CDCl}_3$  and  $\text{DMSO-d}_6$ ):

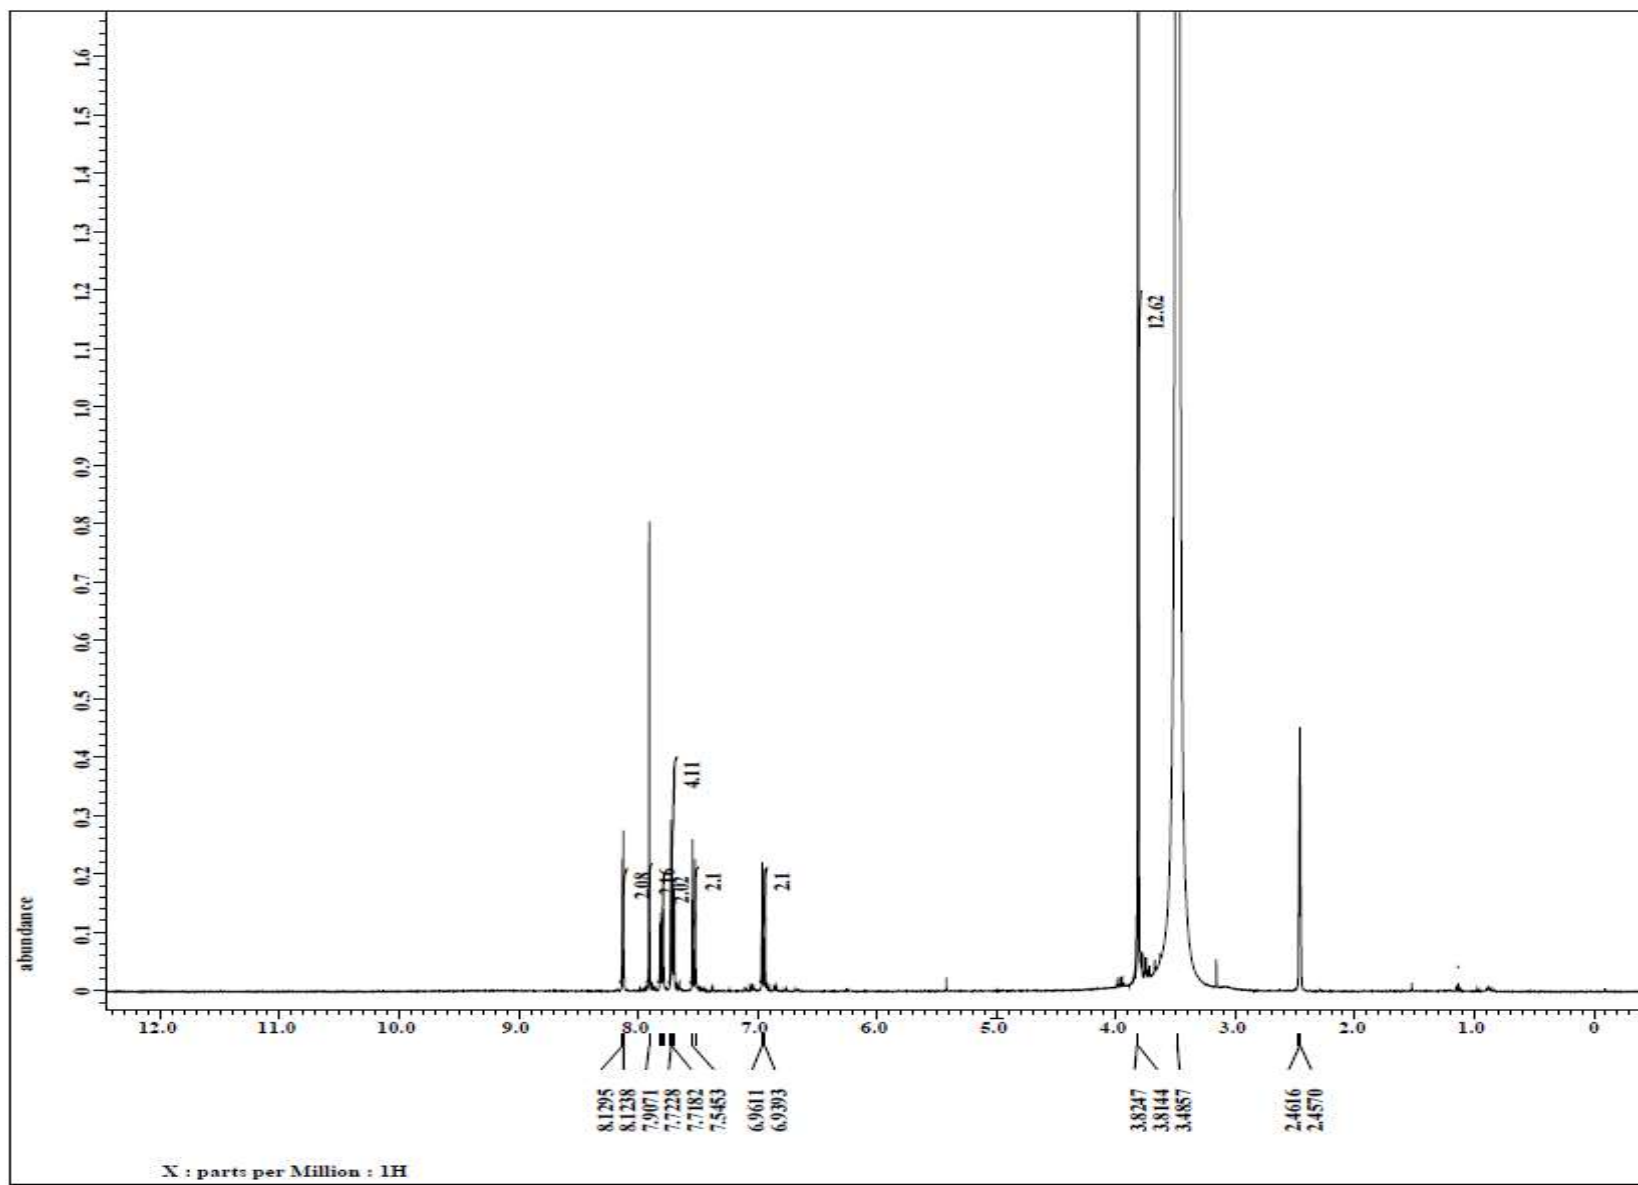

6-Bromo-2-(3,4-dimethoxyphenyl)-3-hydroxy-4H-chromen-4-one (F16):  $^{13}\text{C}$ -NMR (100 MHz;  $\text{CDCl}_3$  and  $\text{DMSO-d}_6$ )

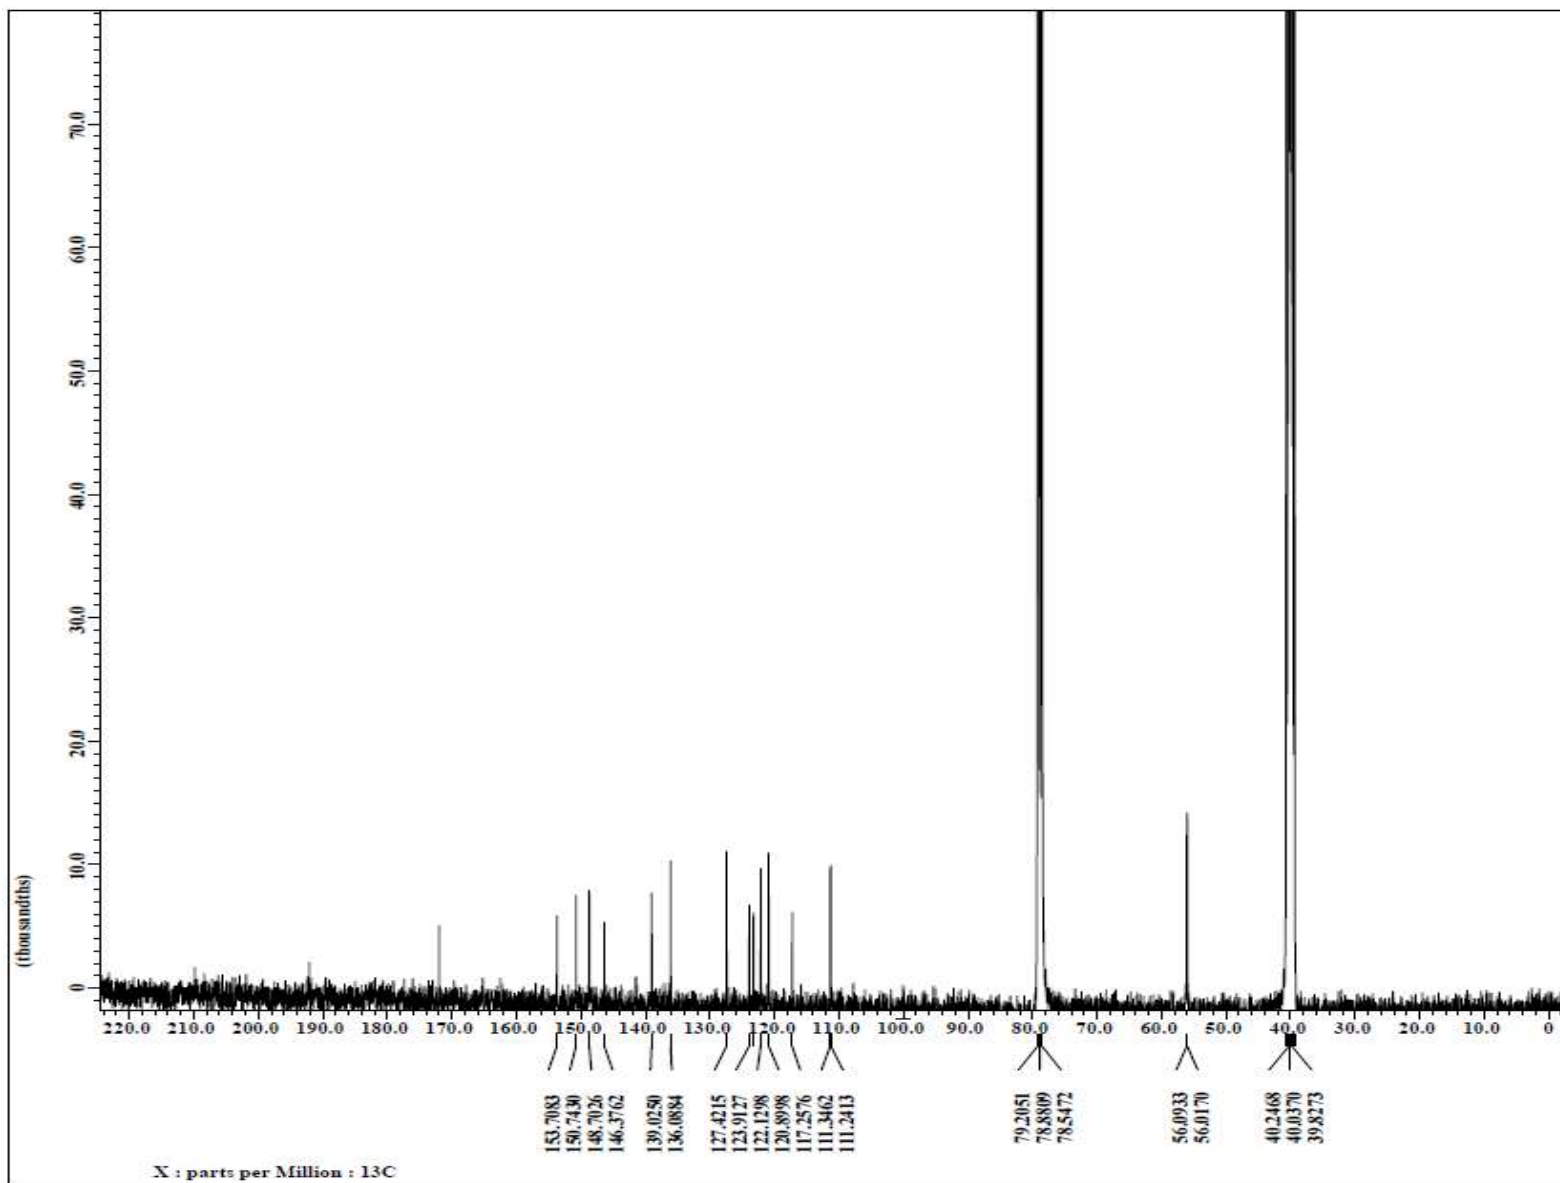

**6-Bromo-2-(3,4-dimethoxyphenyl)-3-hydroxy-4H-chromen-4-one (F16): HRMS (ESI)**

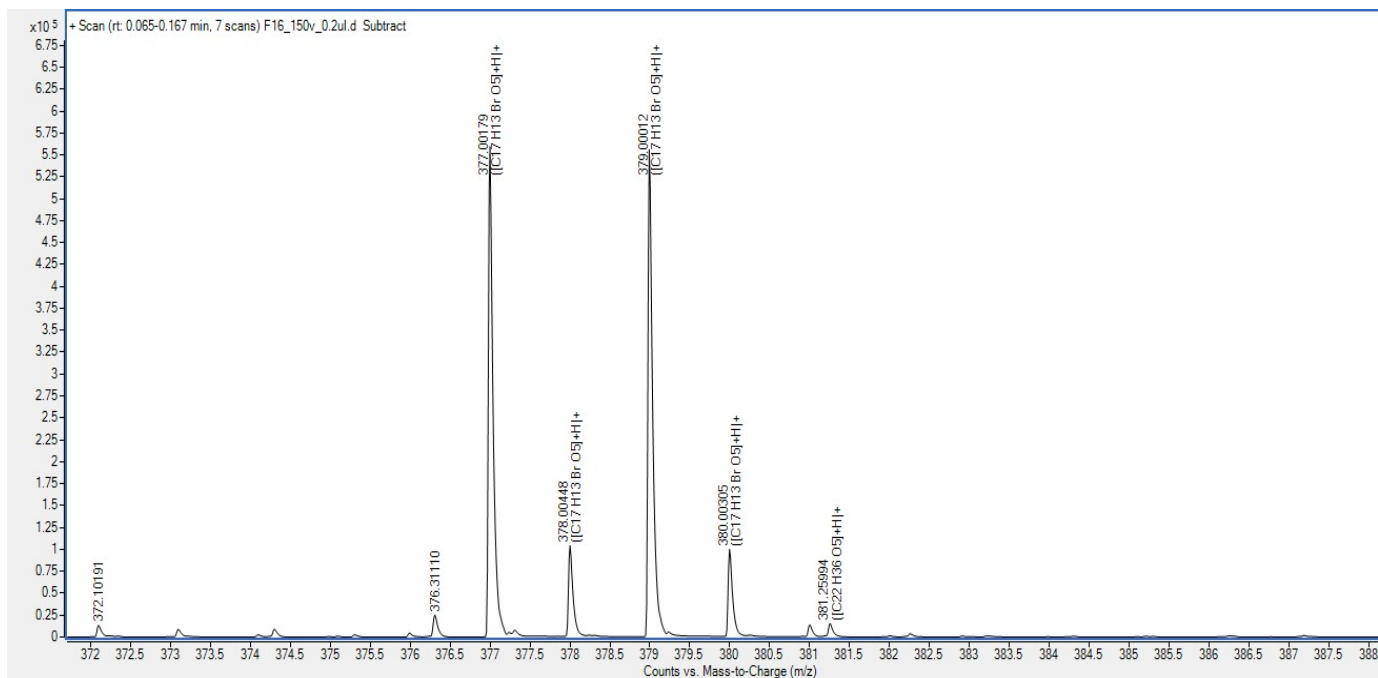

**Species, Calc m/z**

M+, 375.99409

(M+H)+, 377.00191

(M+Na)+, 398.98386

(M+K)+, 414.95779

| Formula,       | Species,       | m/z,              | Score, | Diff (abs. ppm), | Mass      |
|----------------|----------------|-------------------|--------|------------------|-----------|
| C17 H13 Br O5, | <b>(M+H)+,</b> | <b>377.00179,</b> | 99.34, | 0.34,            | 375.99464 |

2-(3-Chlorophenyl)-6-fluoro-3-hydroxy-4H-chromen-4-one (F17):  $^1\text{H-NMR}$  (400 MHz,  $\text{CDCl}_3$ ):

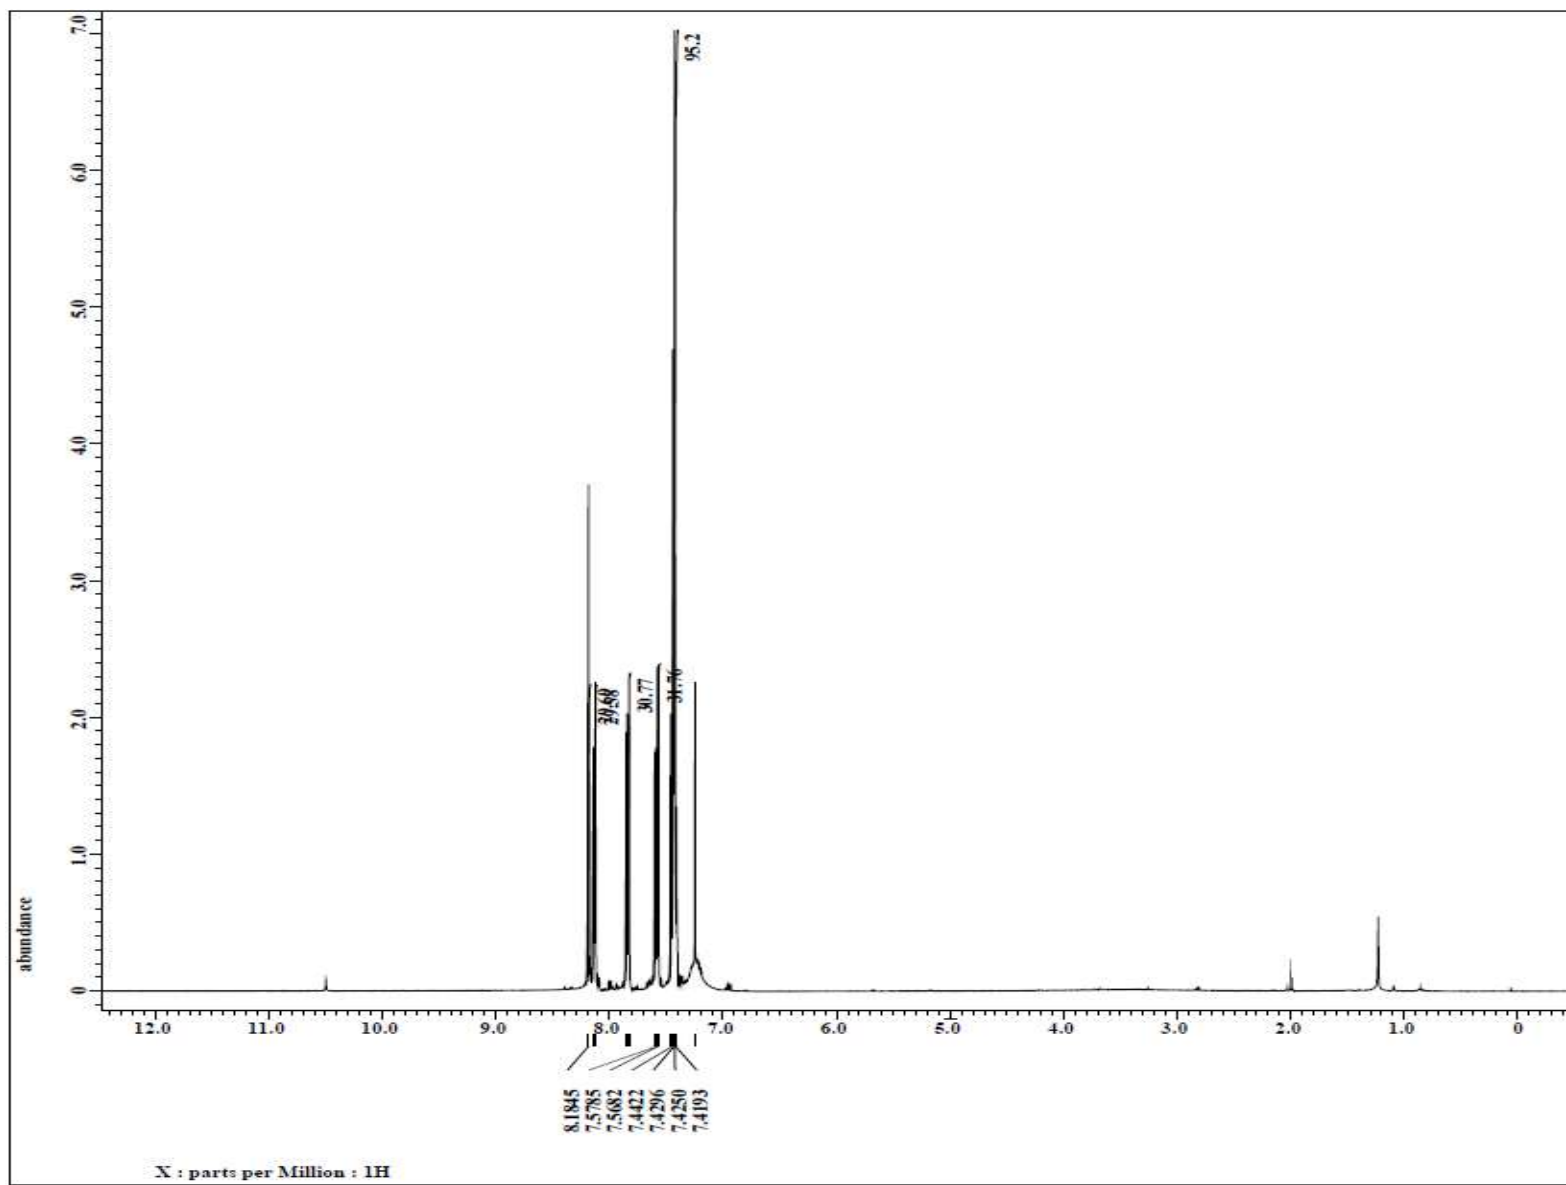



2-(3-Chlorophenyl)-6-fluoro-3-hydroxy-4H-chromen-4-one (F17):  $^{13}\text{C}$ -NMR (100 MHz;  $\text{CDCl}_3$ )

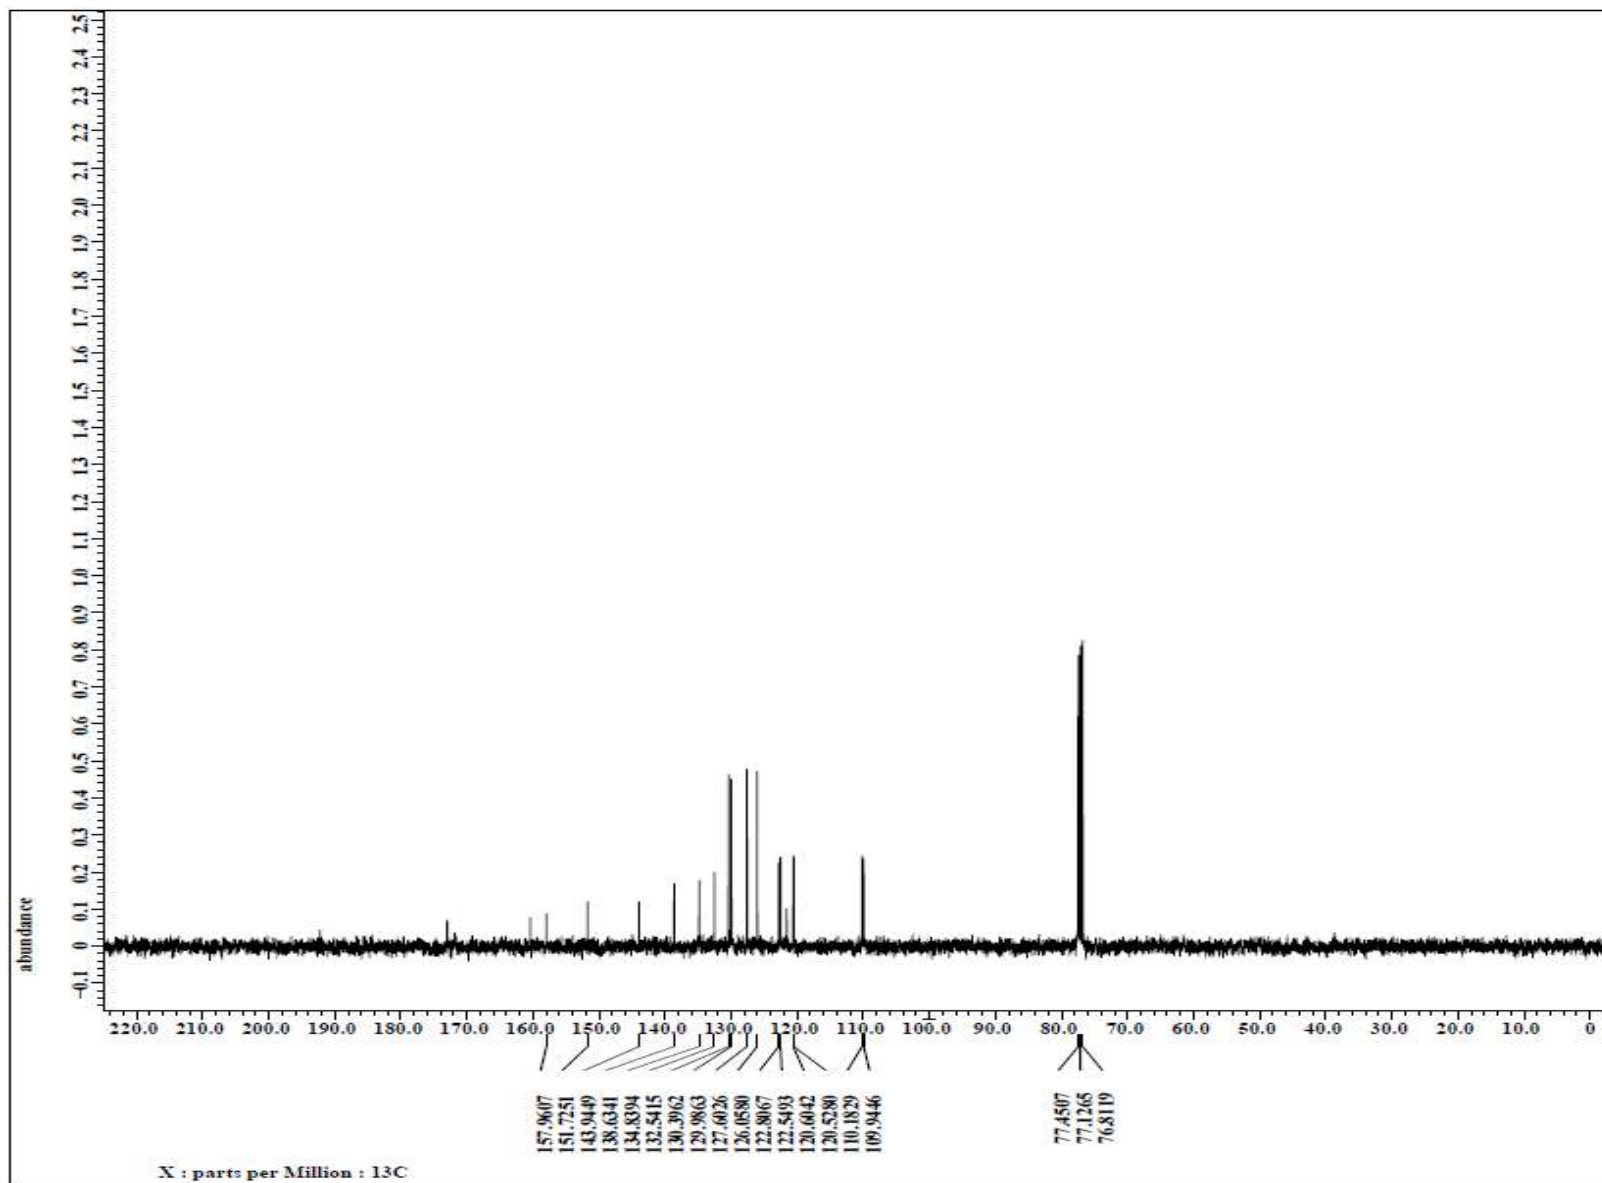

## 2-(3-Chlorophenyl)-6-fluoro-3-hydroxy-4H-chromen-4-one (F17): HRMS (ESI)

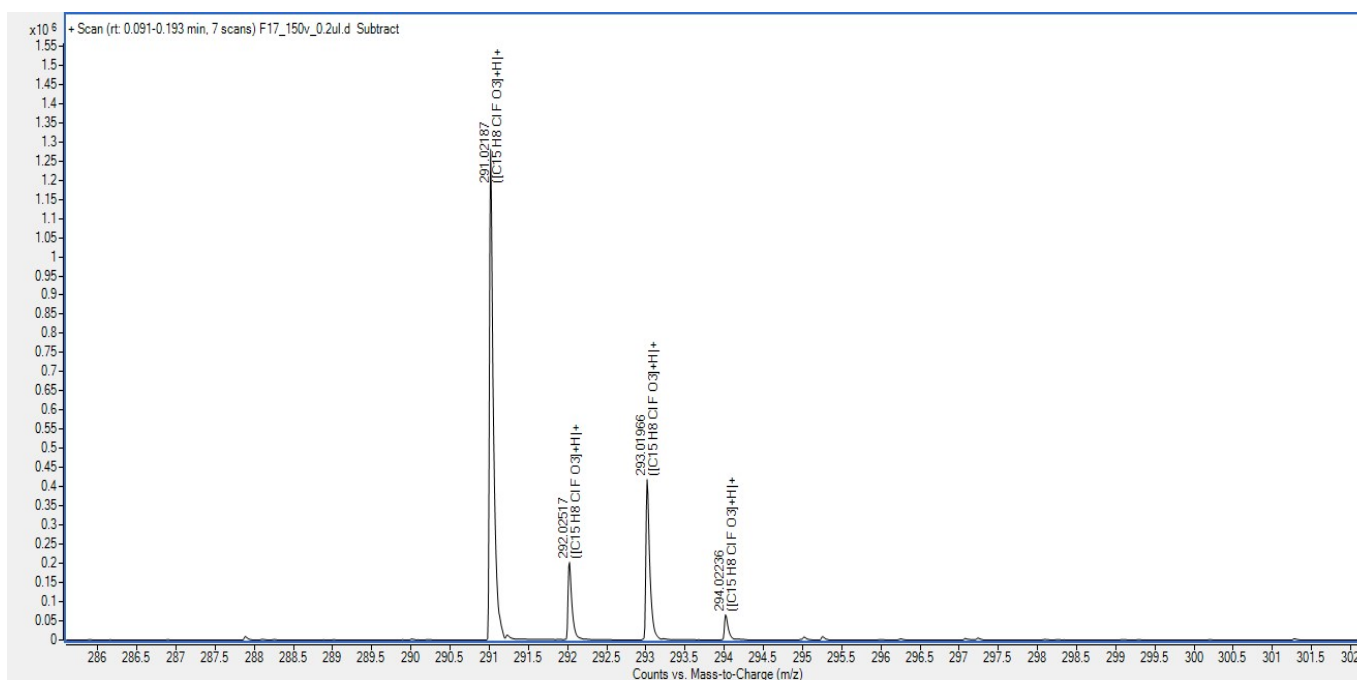

| Species,              | Calc m/z  | Formula,                                             | Species,             | m/z,               | Score, | Diff (abs. ppm), | Mass     |
|-----------------------|-----------|------------------------------------------------------|----------------------|--------------------|--------|------------------|----------|
| M <sup>+</sup> ,      | 290.01405 |                                                      |                      |                    |        |                  |          |
| (M+H) <sup>+</sup> ,  | 291.02188 | C <sub>15</sub> H <sub>8</sub> Cl F O <sub>3</sub> , | (M+H) <sup>+</sup> , | <b>291.02187</b> , | 99.79, | 0.11,            | 290.0146 |
| (M+Na) <sup>+</sup> , | 313.00382 |                                                      |                      |                    |        |                  |          |
| (M+K) <sup>+</sup> ,  | 328.97776 |                                                      |                      |                    |        |                  |          |

2-(4-(Tert-butyl)phenyl)-6-chloro-3-hydroxy-7-methyl-4H-chromen-4-one (F18):  $^1\text{H-NMR}$  (400 MHz,  $\text{CDCl}_3$ ):

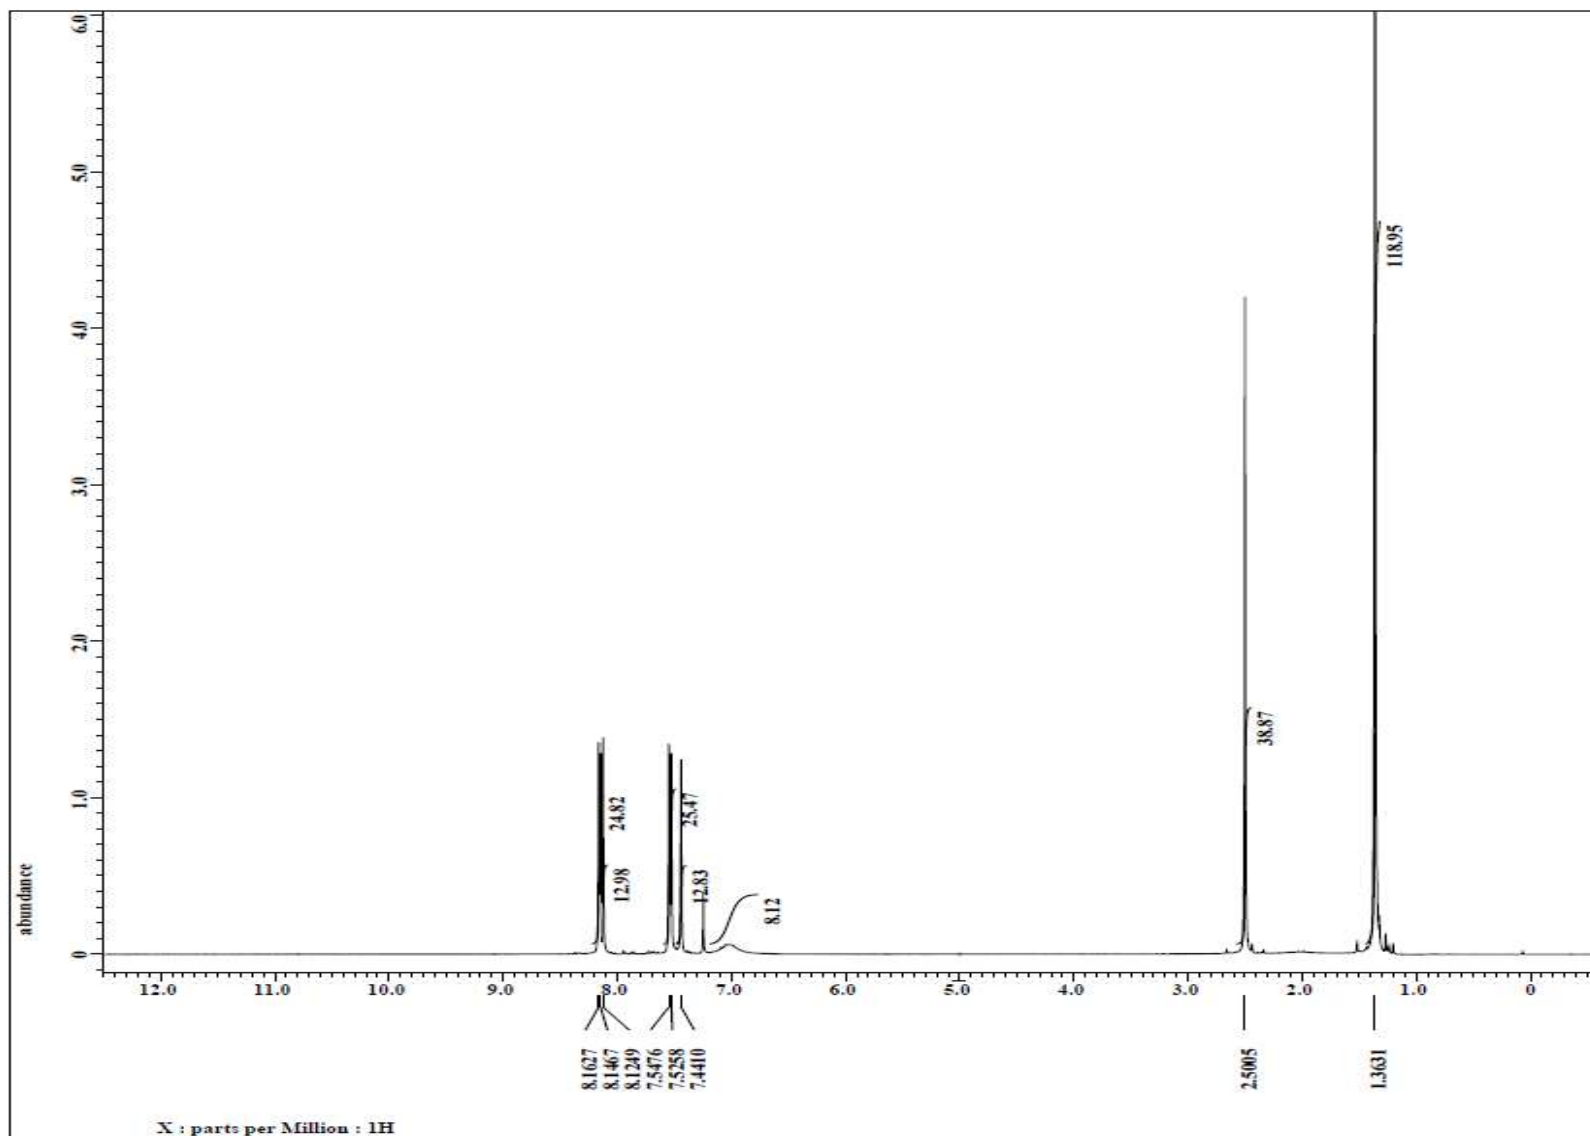

2-(4-(Tert-butyl)phenyl)-6-chloro-3-hydroxy-7-methyl-4H-chromen-4-one (F18):  $^{13}\text{C}$ -NMR (100 MHz;  $\text{CDCl}_3$ )

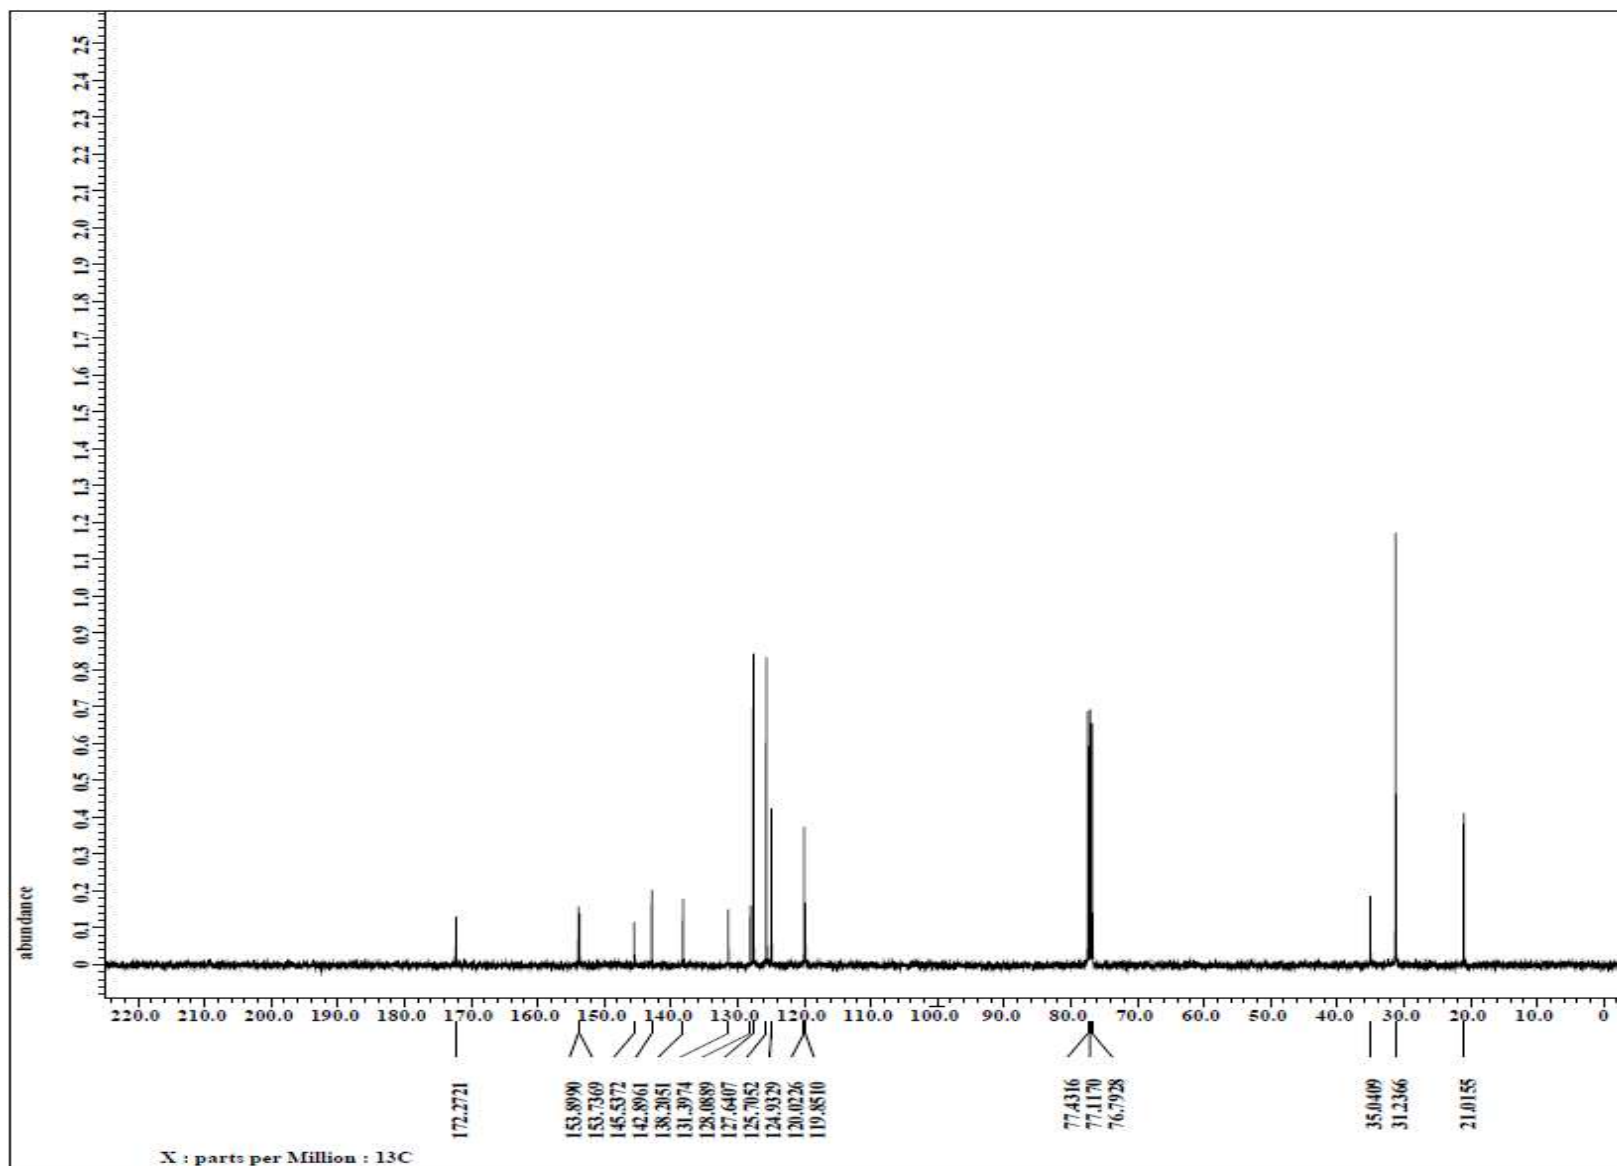

**2-(4-(Tert-butyl)phenyl)-6-chloro-3-hydroxy-7-methyl-4H-chromen-4-one (F18): HRMS (ESI)**

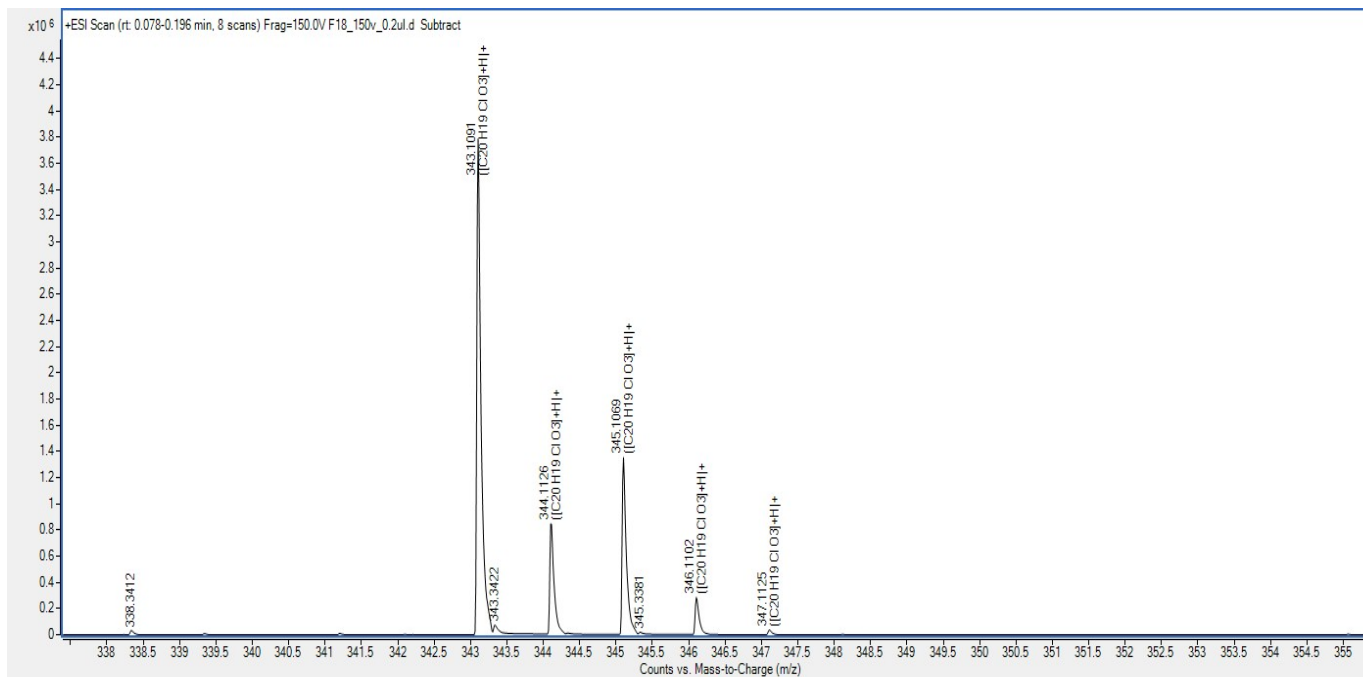

**Species, Calc m/z**

M<sup>+</sup>, 342.1017

(M+H)<sup>+</sup>, 343.1095

(M+Na)<sup>+</sup>, 365.0915

(M+K)<sup>+</sup>, 381.0654

| Formula,                                            | Species,                  | m/z,             | Score, | Diff (abs. ppm), | Mass     |
|-----------------------------------------------------|---------------------------|------------------|--------|------------------|----------|
| C <sub>20</sub> H <sub>19</sub> Cl O <sub>3</sub> , | <b>(M+H)<sup>+</sup>,</b> | <b>343.1091,</b> | 99.2,  | 1.3,             | 342.1023 |

2-(4-(Benzyloxy)phenyl)-6-chloro-3-hydroxy-7-methyl-4H-chromen-4-one (F19):  $^1\text{H-NMR}$  (400 MHz,  $\text{CDCl}_3$ ):

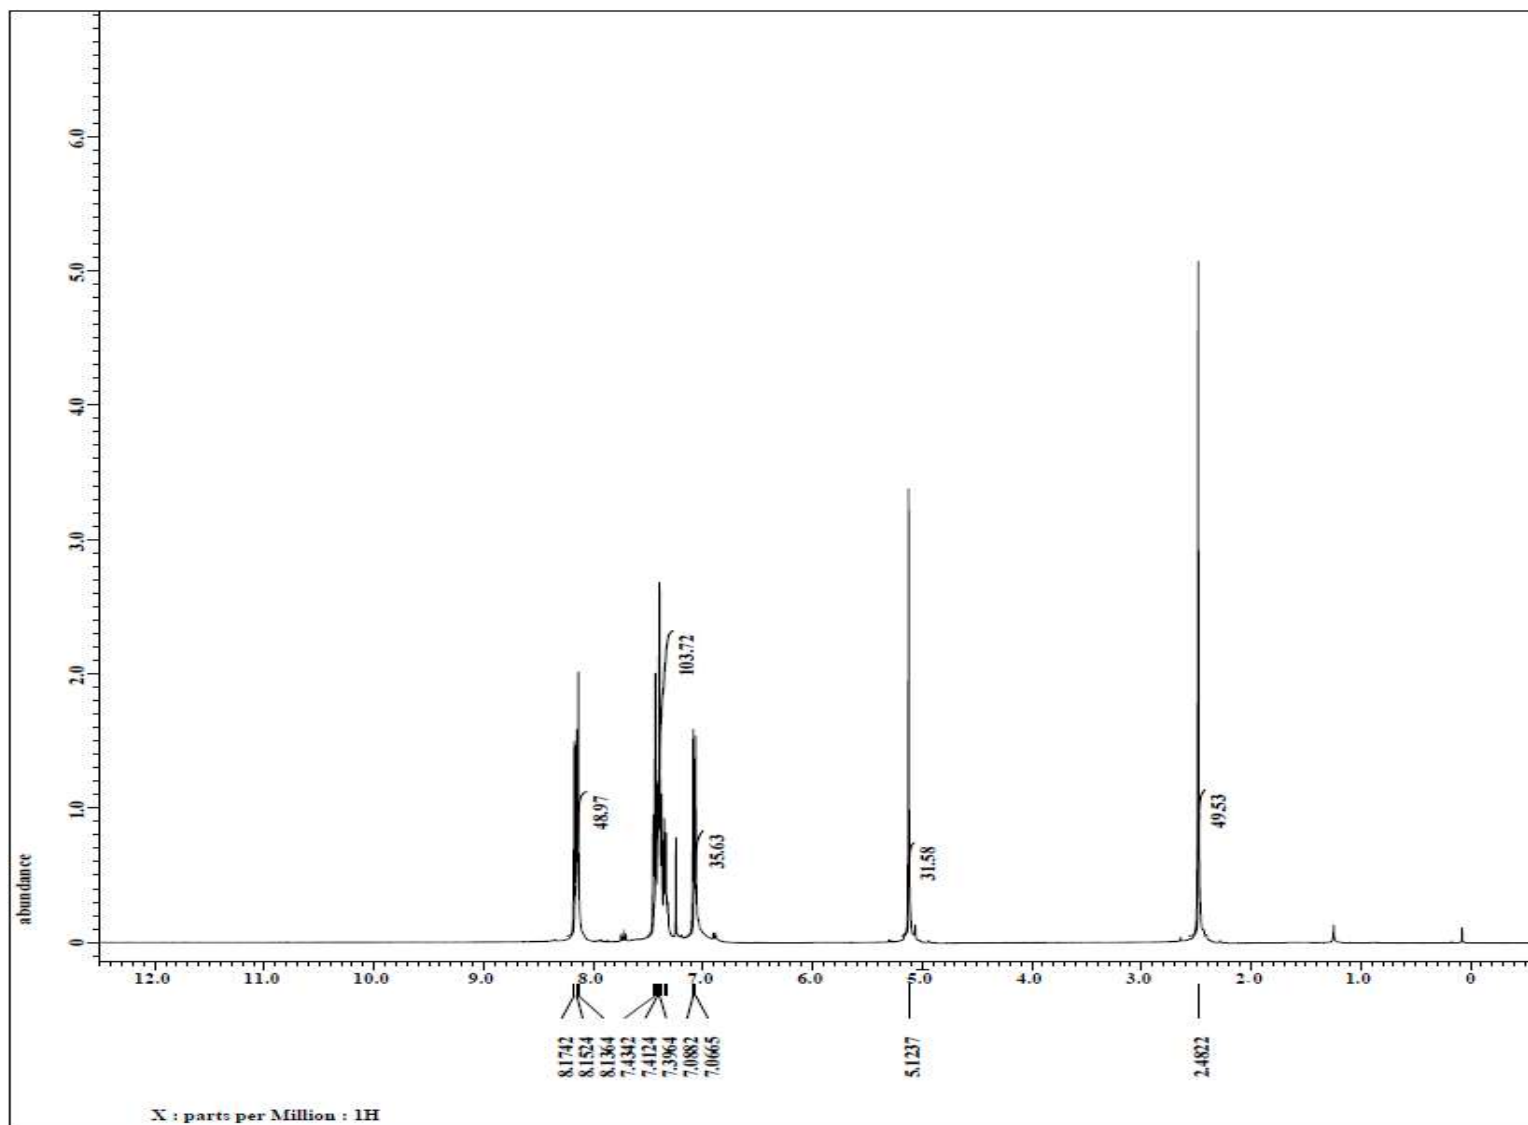

2-(4-(Benzyloxy)phenyl)-6-chloro-3-hydroxy-7-methyl-4H-chromen-4-one (F19):  $^{13}\text{C}$ -NMR (100 MHz;  $\text{CDCl}_3$ )

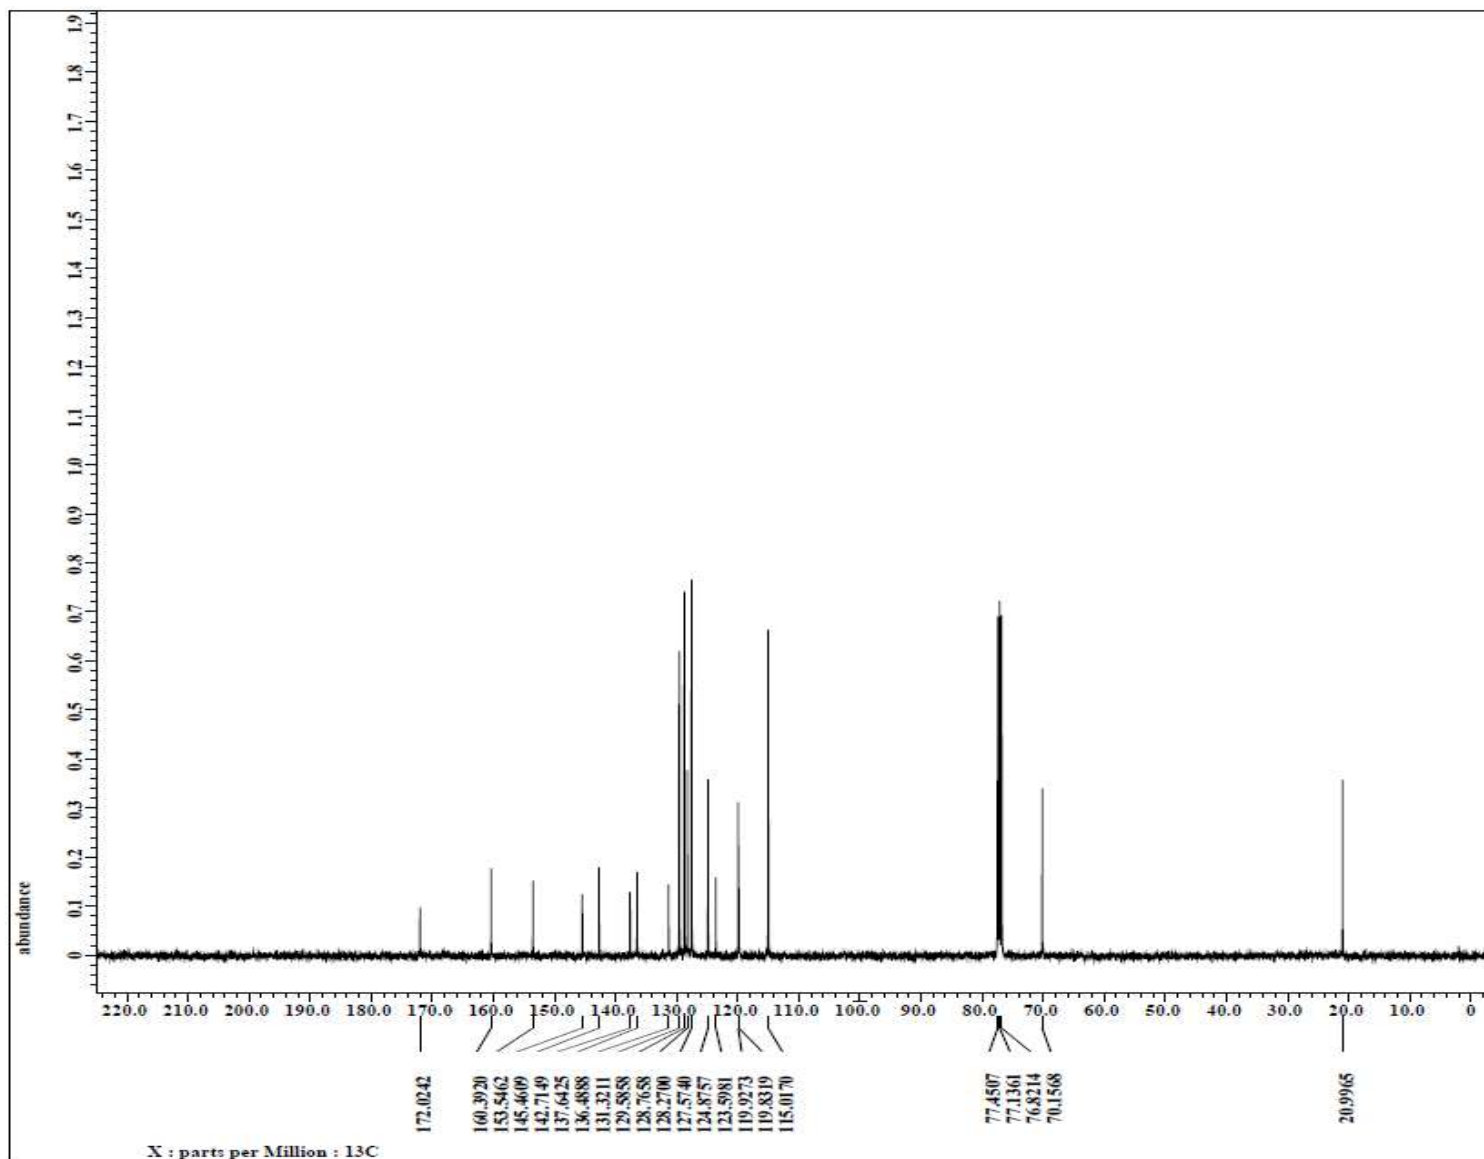

## 2-(4-(Benzyloxy)phenyl)-6-chloro-3-hydroxy-7-methyl-4H-chromen-4-one (F19): HRMS (ESI)

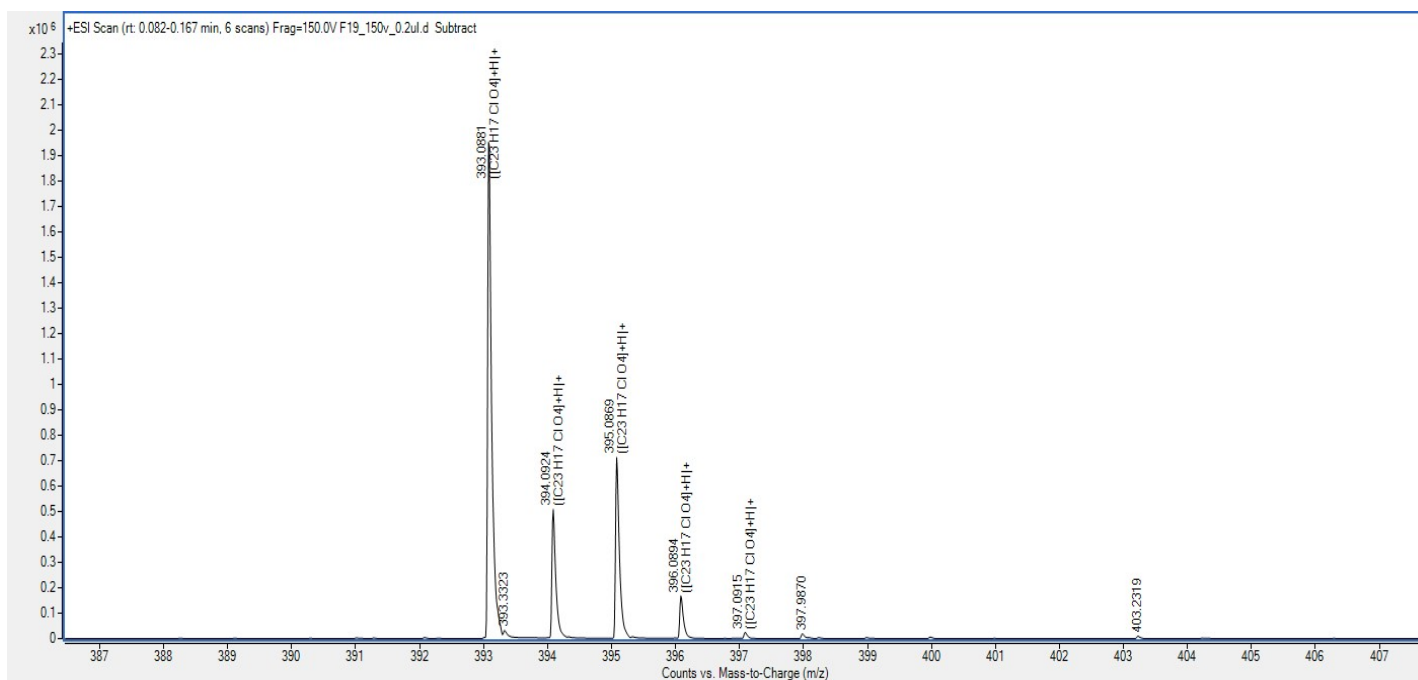

**Species,**      **Calc m/z**

M+,              392.081

(M+H)+,        393.0888

(M+Na)+,       415.0708

(M+K)+,        431.0447

| Formula,                                            | Species,       | m/z,             | Score, | Diff (abs. ppm), | Mass     |
|-----------------------------------------------------|----------------|------------------|--------|------------------|----------|
| C <sub>23</sub> H <sub>17</sub> Cl O <sub>4</sub> , | <b>(M+H)+,</b> | <b>393.0881,</b> | 98.39, | 1.07,            | 392.0815 |



2-(4-Bromophenyl)-3-hydroxy-6-methyl-8-nitro-4H-chromen-4-one (F20):  $^1\text{H-NMR}$  (400 MHz,  $\text{CDCl}_3$ ):

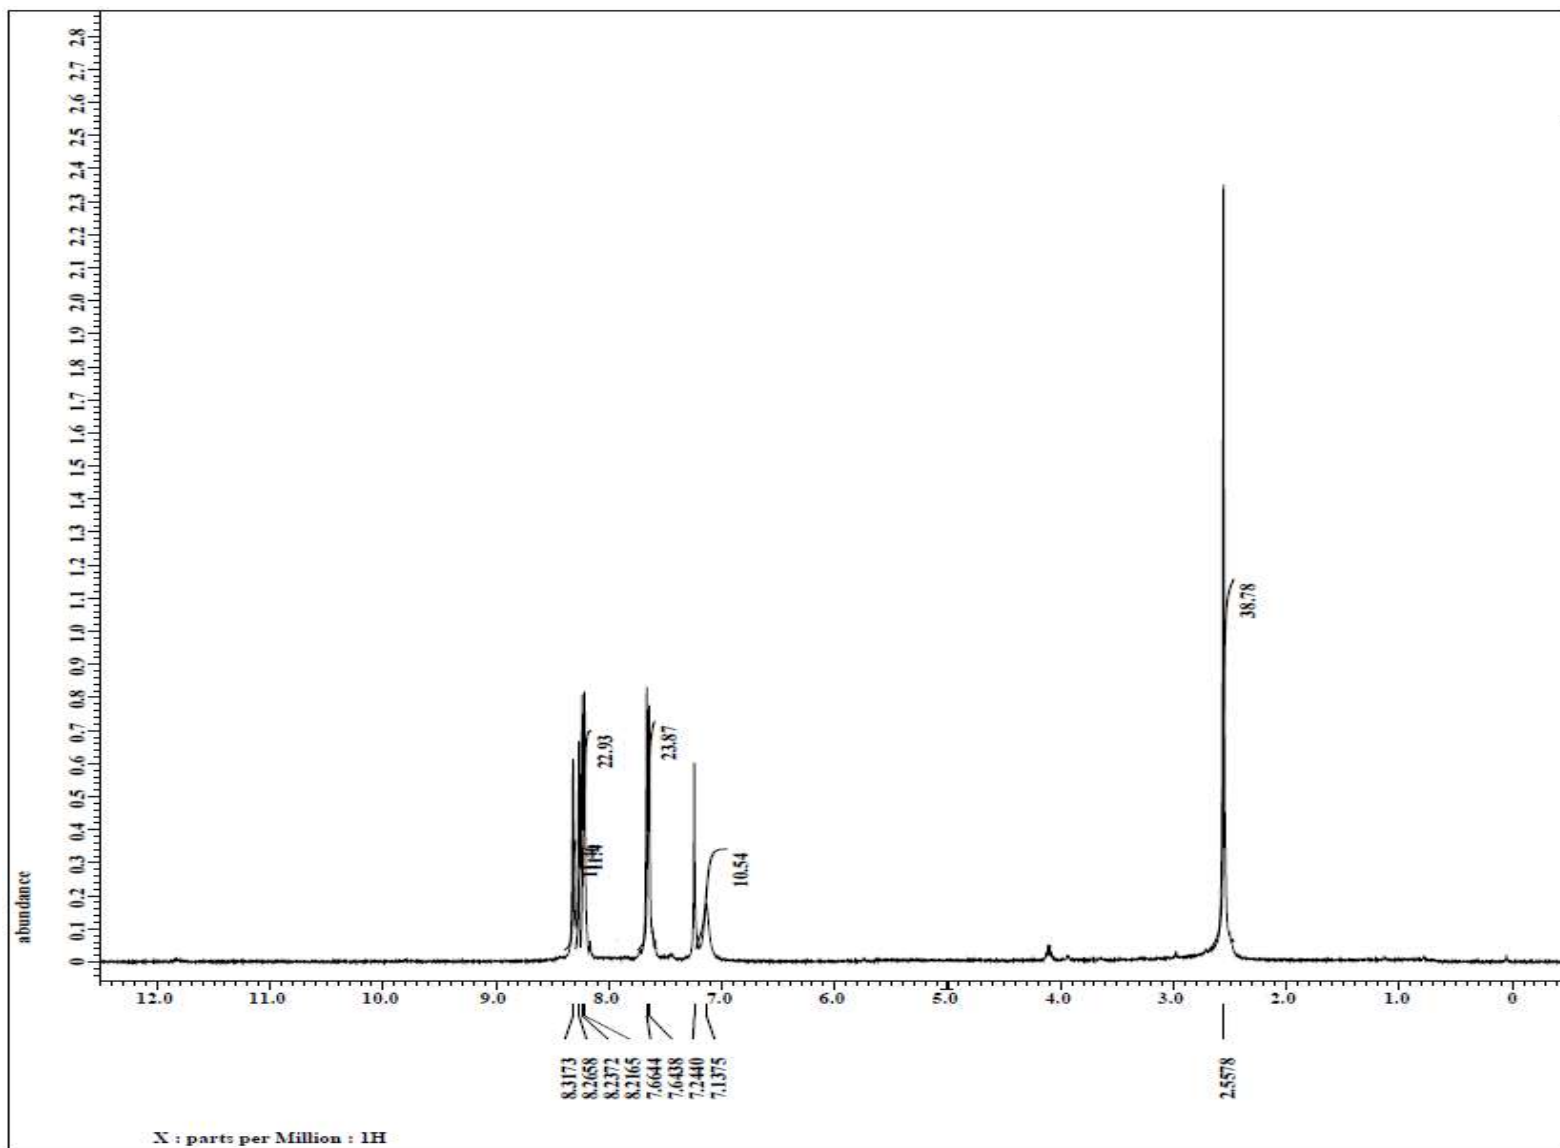

2-(4-Bromophenyl)-3-hydroxy-6-methyl-8-nitro-4H-chromen-4-one (F20):  $^{13}\text{C}$ -NMR (100 MHz;  $\text{CDCl}_3$ )

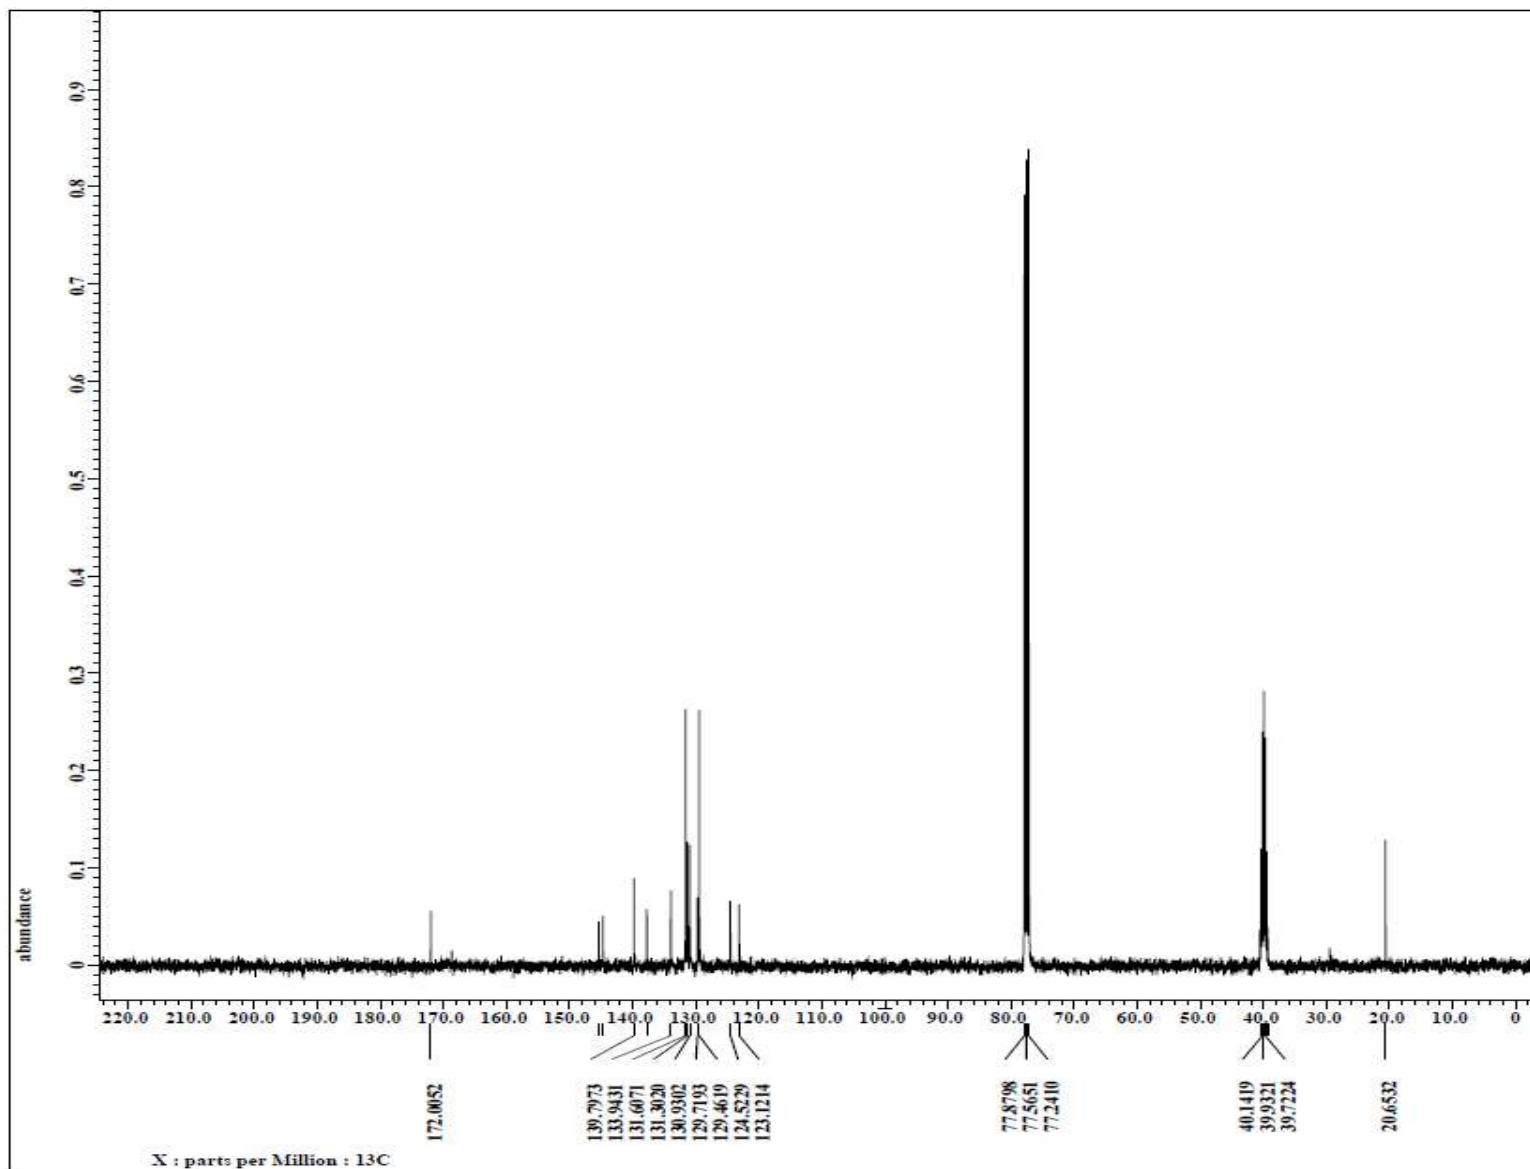

**2-(4-Bromophenyl)-3-hydroxy-6-methyl-8-nitro-4H-chromen-4-one (F20):**

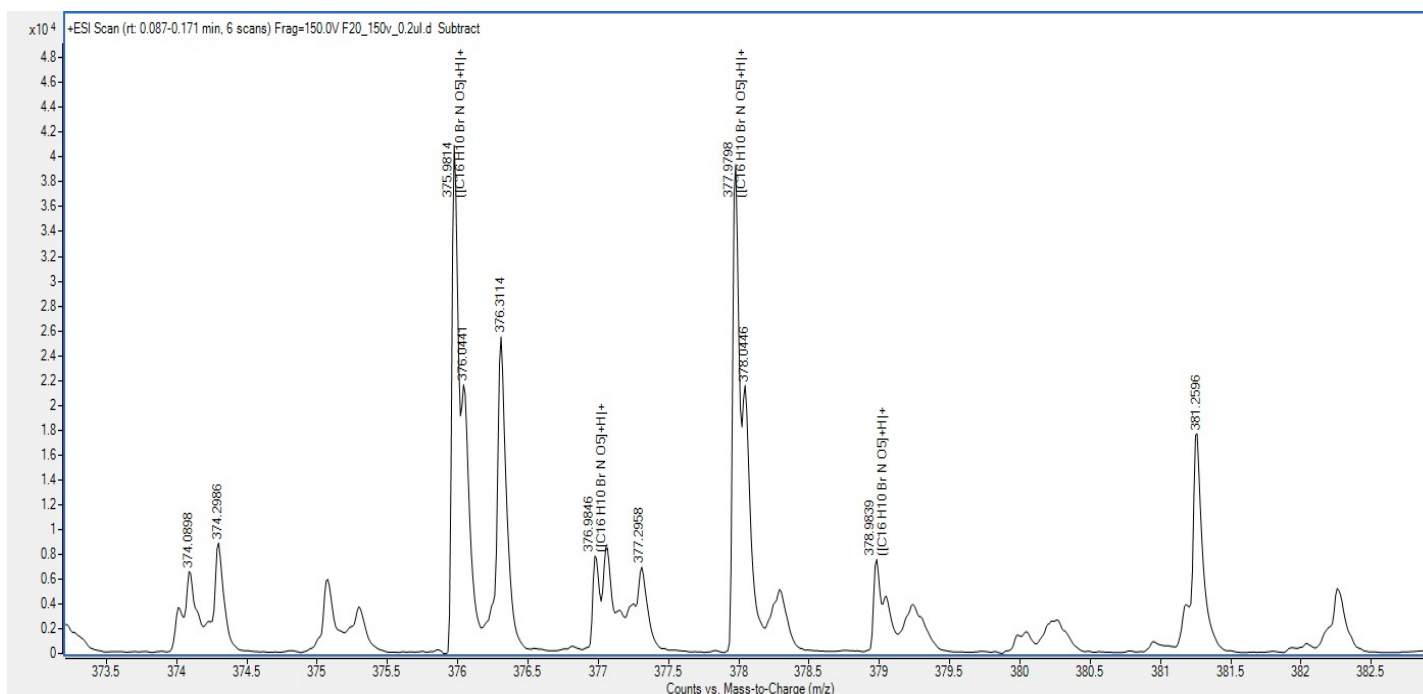

| Species, | Calc m/z | Formula,         | Species, | m/z,      | Score, | Diff (abs. ppm), | Mass     |
|----------|----------|------------------|----------|-----------|--------|------------------|----------|
| M+,      | 374.9737 |                  |          |           |        |                  |          |
| (M+H)+,  | 375.9815 | C16 H10 Br N O5, | (M+H)+,  | 375.9814, | 98.59, | 0.25,            | 374.9742 |
| (M+Na)+, | 397.9635 |                  |          |           |        |                  |          |
| (M+K)+,  | 413.9374 |                  |          |           |        |                  |          |

7-Chloro-2-(4-ethoxy-3-fluorophenyl)-3-hydroxy-4H-chromen-4-one (F21): <sup>1</sup>H-NMR (400 MHz, CDCl<sub>3</sub>)

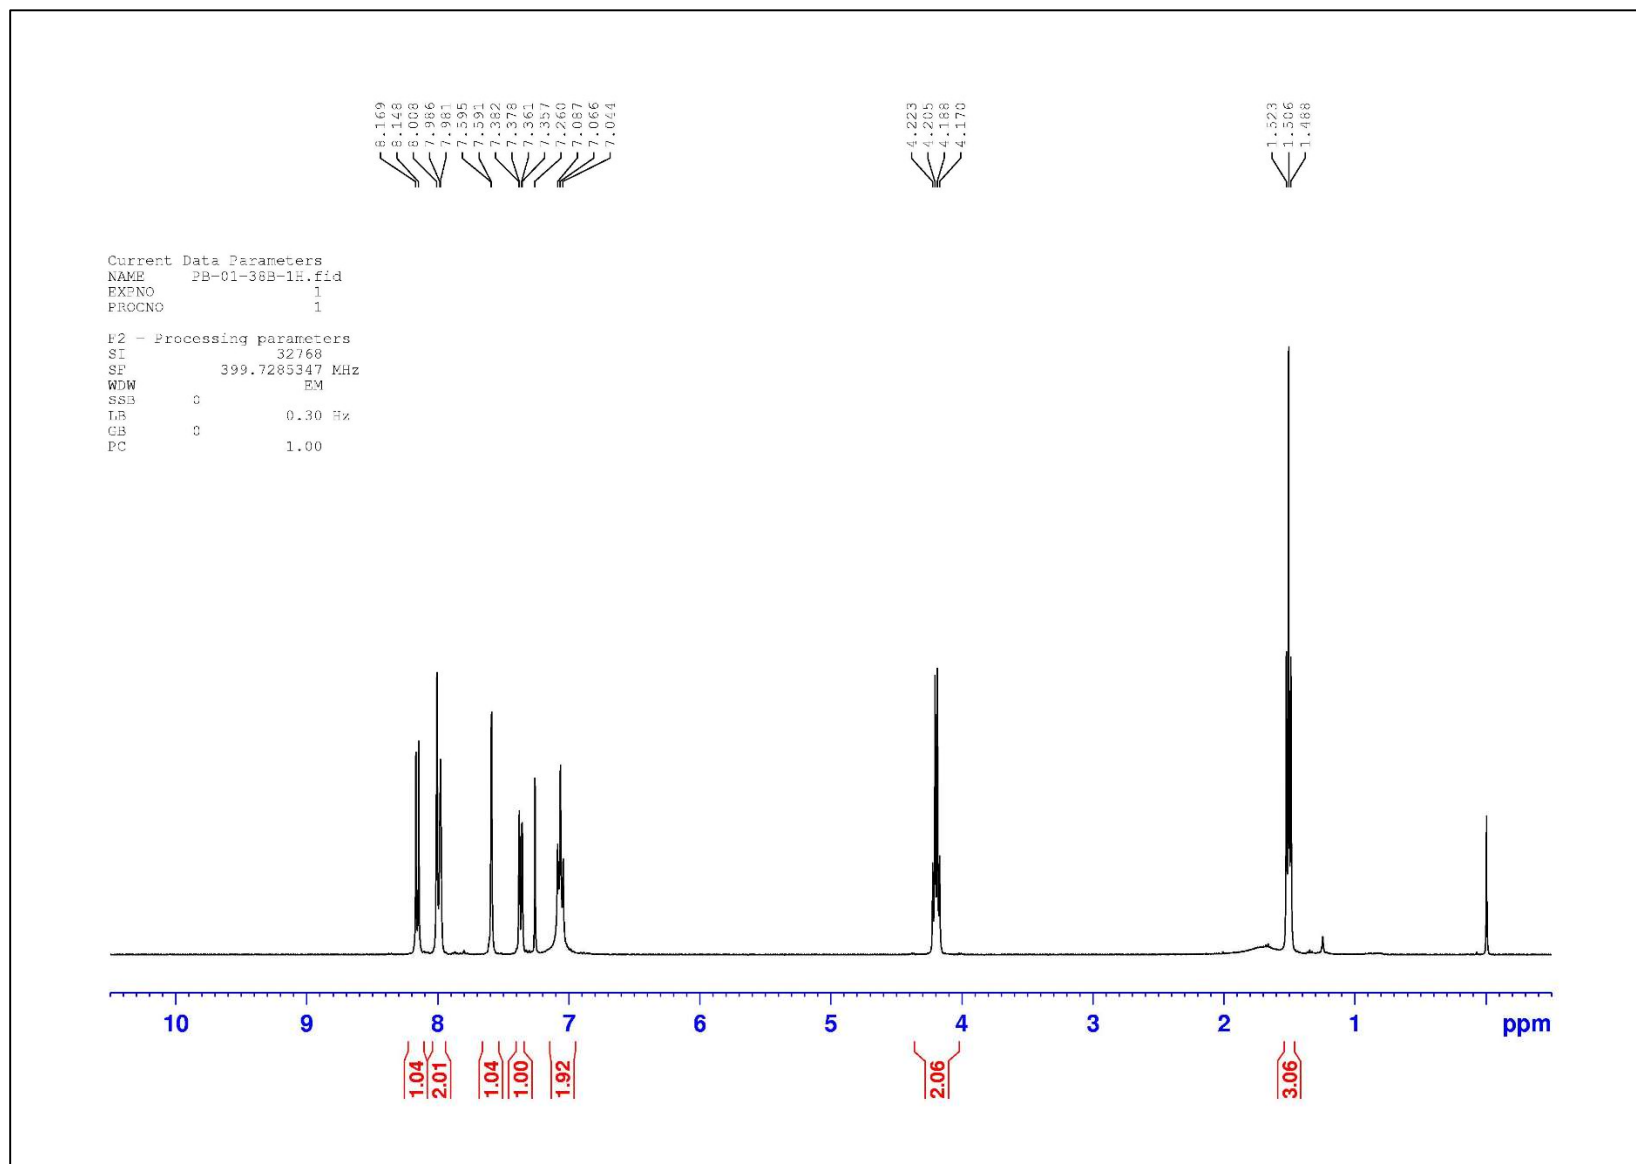

7-Chloro-2-(4-ethoxy-3-fluorophenyl)-3-hydroxy-4H-chromen-4-one (F21):  $^{13}\text{C}$ -NMR (100 MHz;  $\text{CDCl}_3$ )

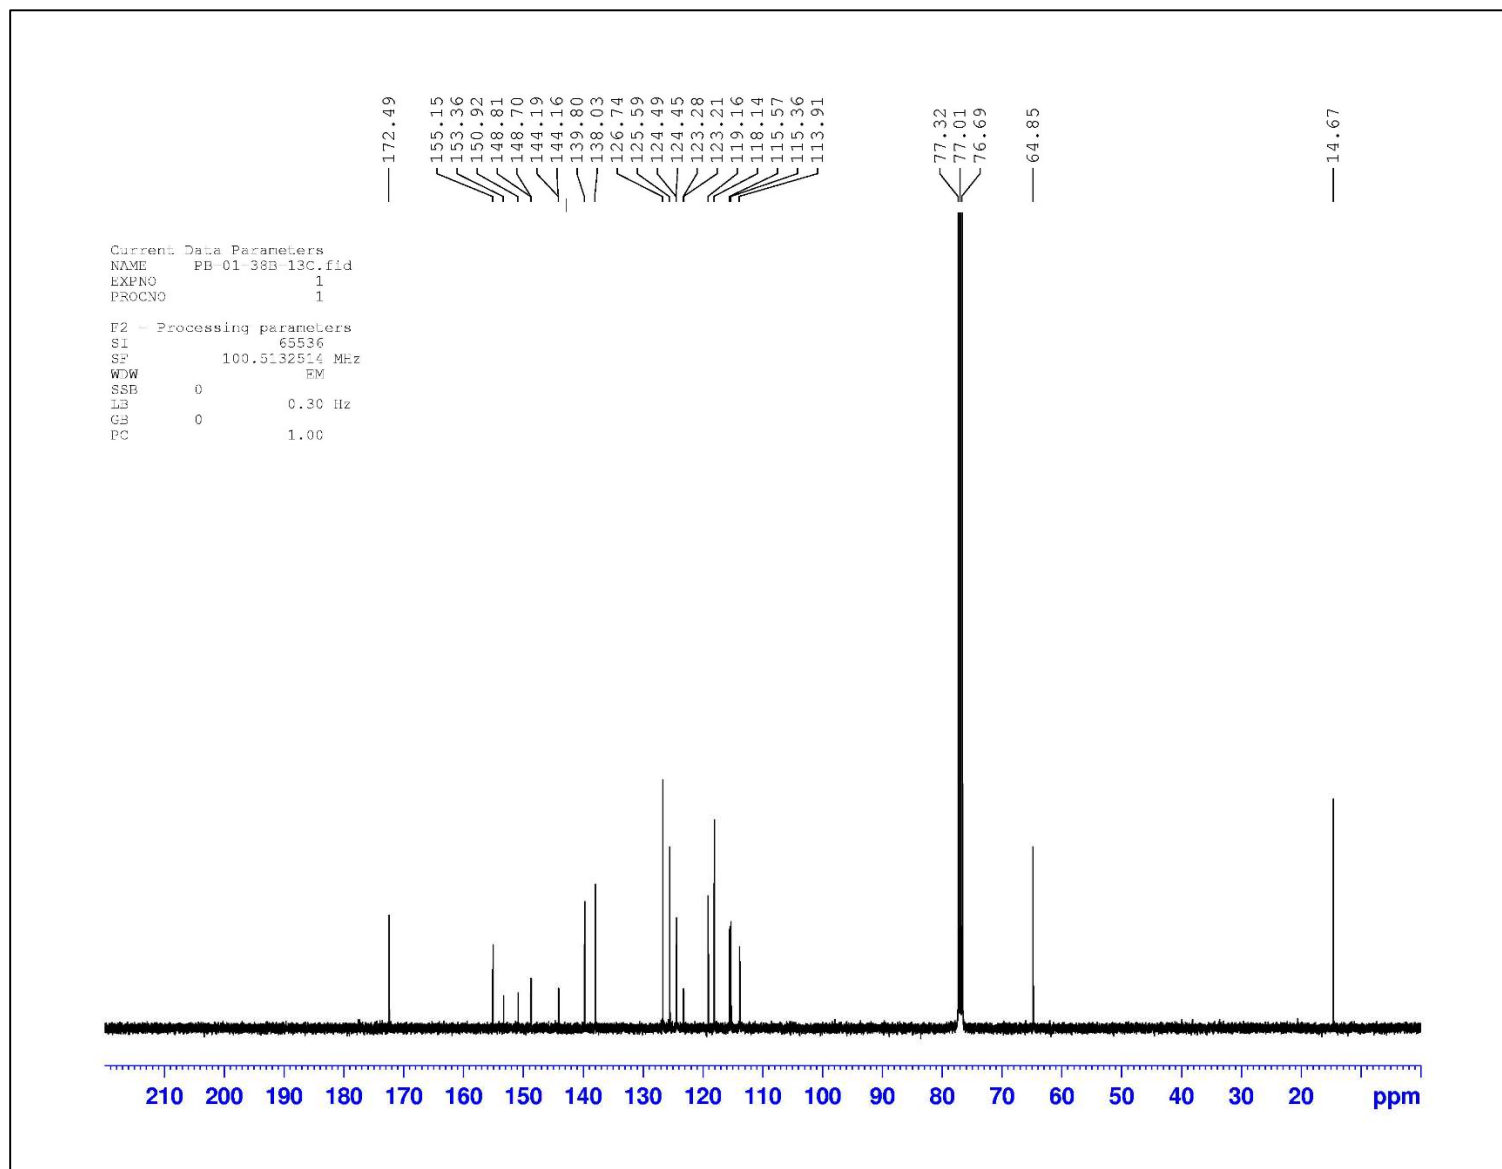

**7-Chloro-2-(4-ethoxy-3-fluorophenyl)-3-hydroxy-4H-chromen-4-one (F21): HRMS (ESI)**

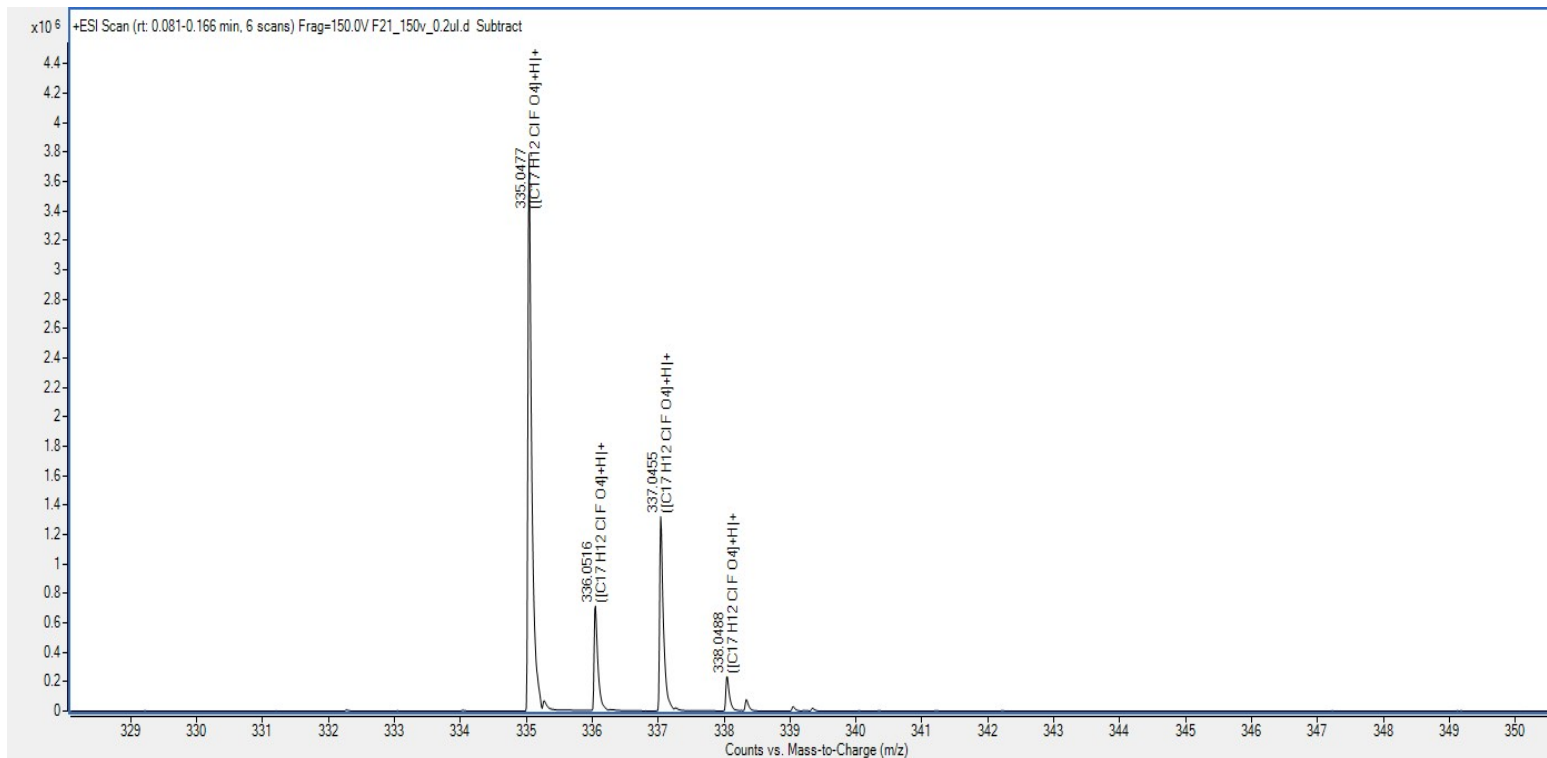

| Species, | Calc m/z | Formula,         | Species,       | m/z,             | Score, | Diff (abs. ppm), | Mass     |
|----------|----------|------------------|----------------|------------------|--------|------------------|----------|
| M+,      | 334.0403 |                  |                |                  |        |                  |          |
| (M+H)+,  | 335.0481 | C17 H12 Cl F O4, | <b>(M+H)+,</b> | <b>335.0477,</b> | 99.29, | 0.91,            | 334.0408 |
| (M+Na)+, | 357.03   |                  |                |                  |        |                  |          |
| (M+K)+,  | 373.004  |                  |                |                  |        |                  |          |

6-Fluoro-3-hydroxy-2-(3,4,5-trimethoxyphenyl)-4H-chromen-4-one (F22):  $^1\text{H-NMR}$  (400 MHz,  $\text{CDCl}_3$ ):

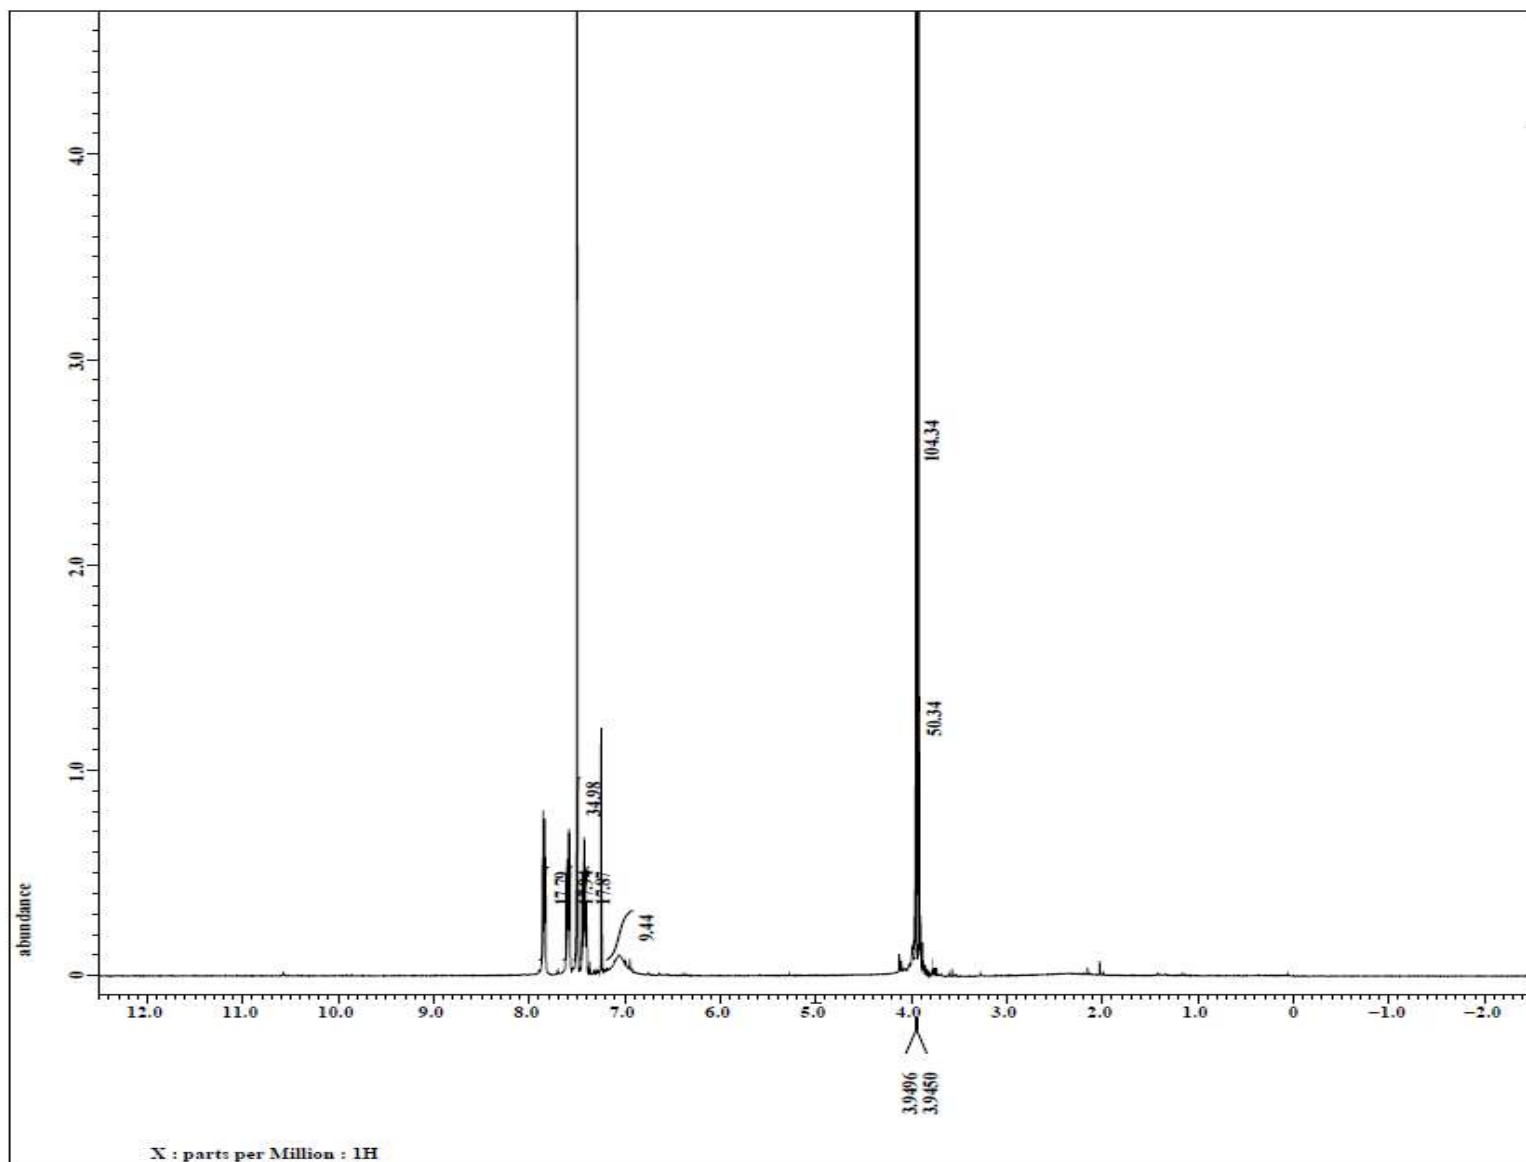

6-Fluoro-3-hydroxy-2-(3,4,5-trimethoxyphenyl)-4H-chromen-4-one (F22):  $^{13}\text{C}$ -NMR (100 MHz;  $\text{CDCl}_3$ )

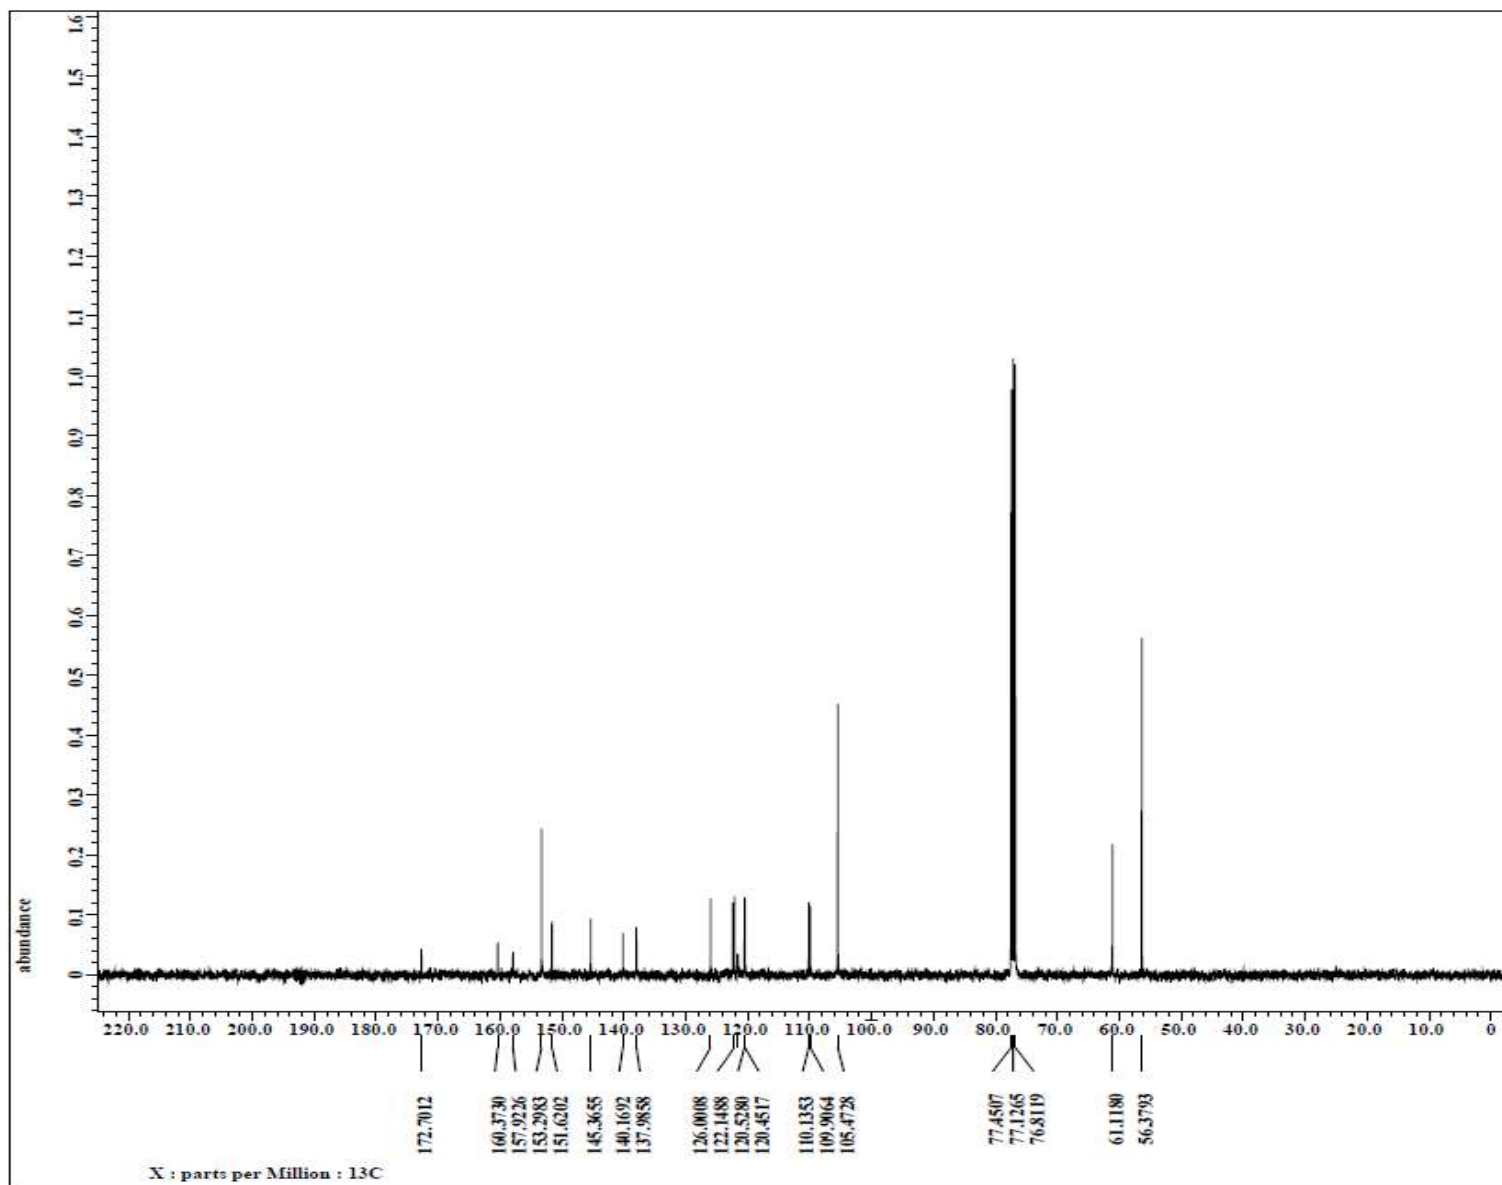



### 6-Fluoro-3-hydroxy-2-(3,4,5-trimethoxyphenyl)-4H-chromen-4-one (F22): HRMS (ESI)

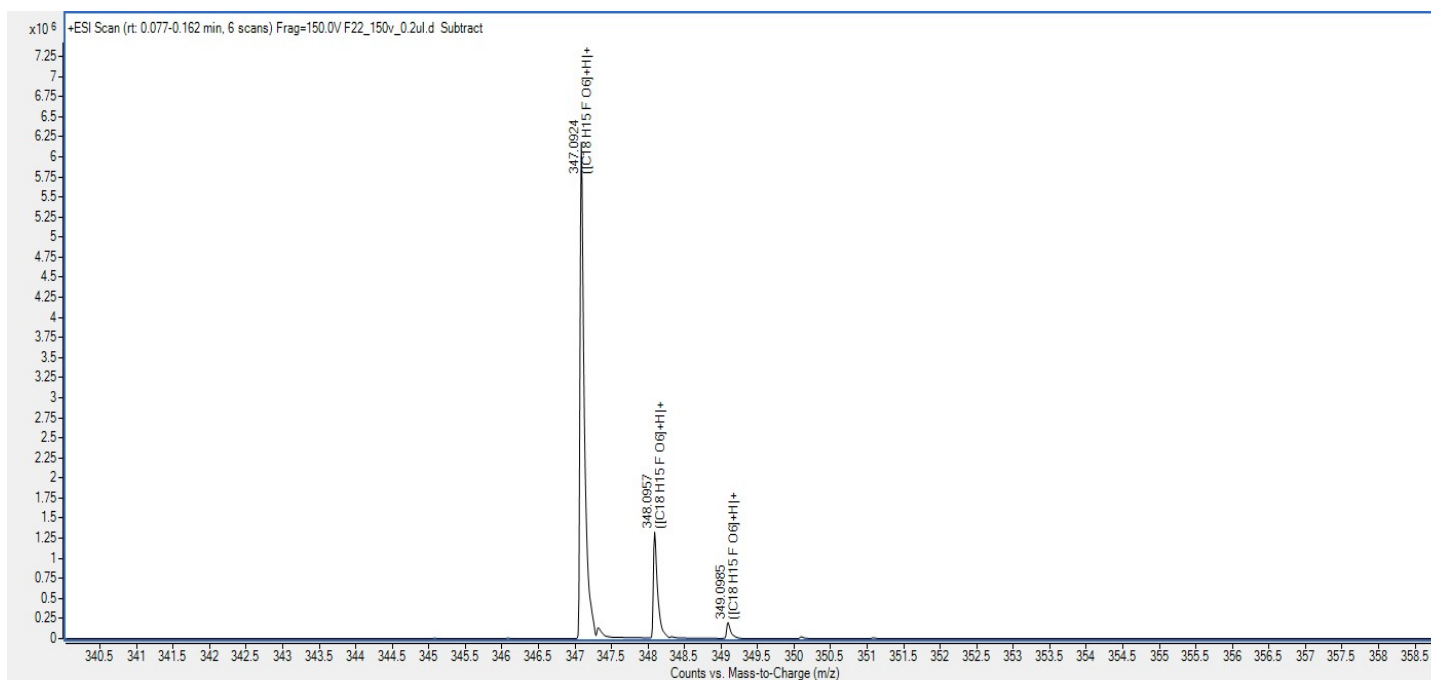

| Species, | Calc m/z | Formula,      | Species,       | m/z,             | Score, | Diff (abs. ppm), | Mass     |
|----------|----------|---------------|----------------|------------------|--------|------------------|----------|
| M+,      | 346.0847 |               |                |                  |        |                  |          |
| (M+H)+,  | 347.0925 |               |                |                  |        |                  |          |
| (M+Na)+, | 369.0745 | C18 H15 F O6, | <b>(M+H)+,</b> | <b>347.0924,</b> | 99.35, | 0.49,            | 346.0853 |
| (M+K)+,  | 385.0484 |               |                |                  |        |                  |          |

**3-Hydroxy-2-(2,4,5-trimethoxyphenyl)-4H-chromen-4-one (F23): <sup>1</sup>H-NMR (400 MHz, CDCl<sub>3</sub>)**

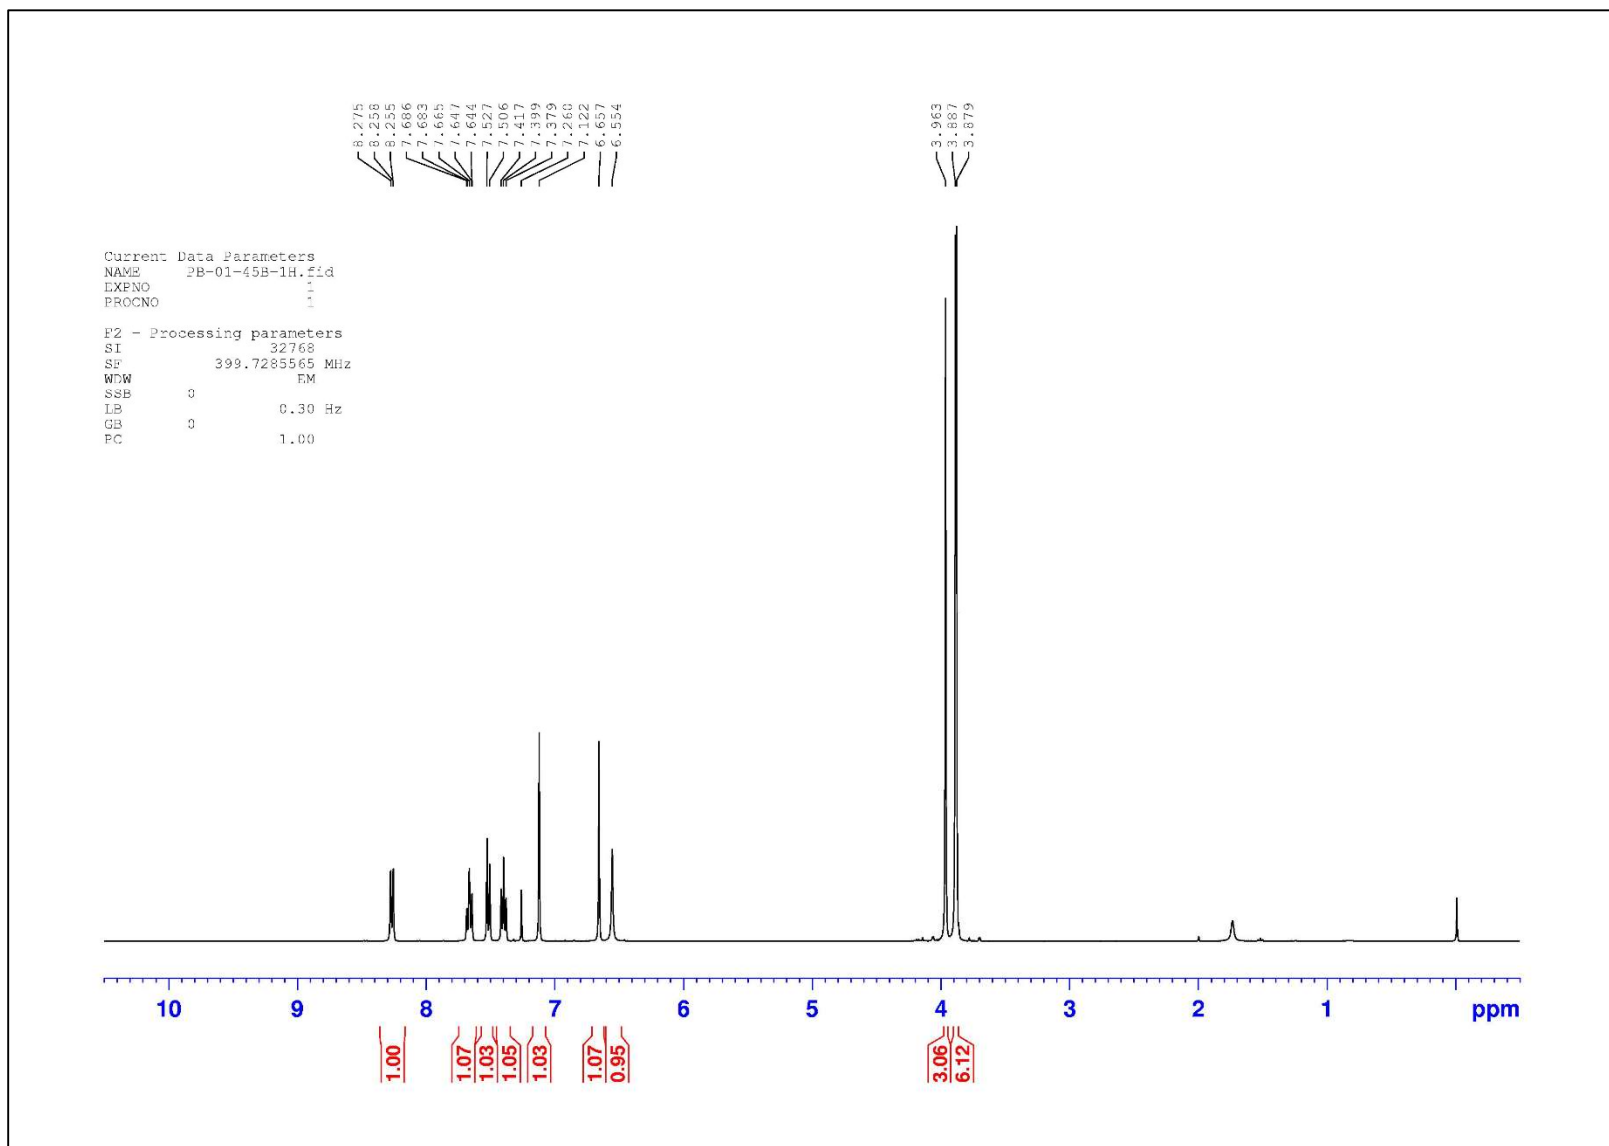

3-Hydroxy-2-(2,4,5-trimethoxyphenyl)-4H-chromen-4-one (F23):  $^{13}\text{C}$ -NMR (100 MHz;  $\text{CDCl}_3$ )

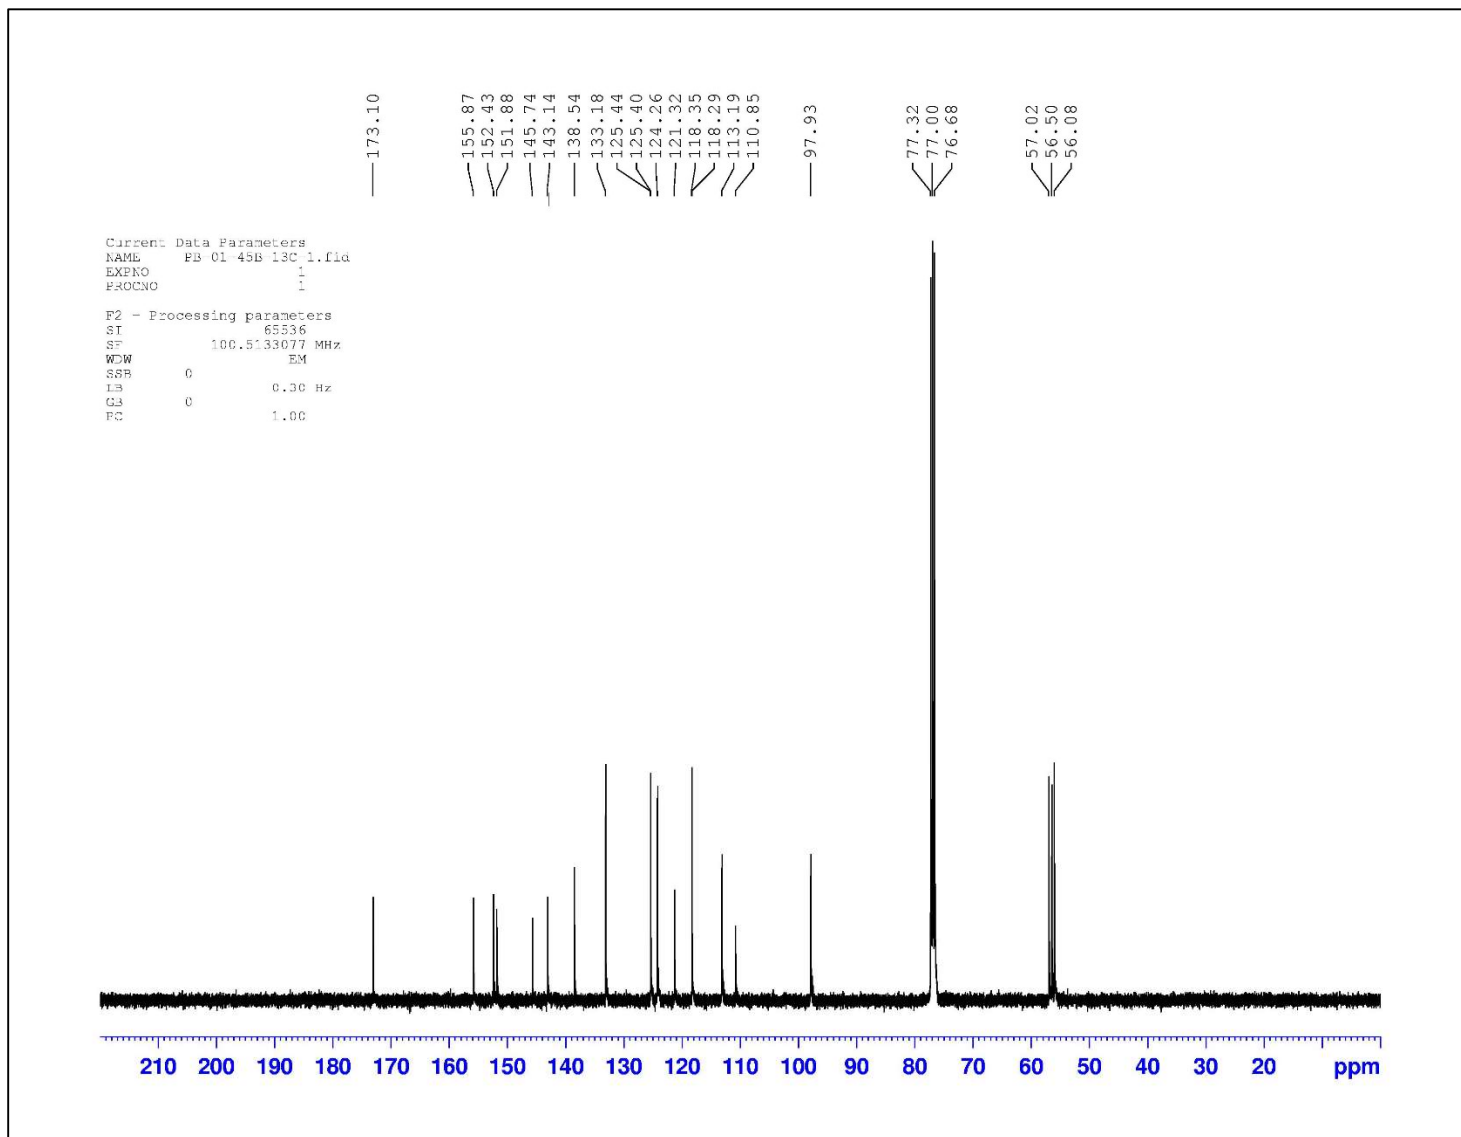

### 3-Hydroxy-2-(2,4,5-trimethoxyphenyl)-4H-chromen-4-one (F23): HRMS (ESI)

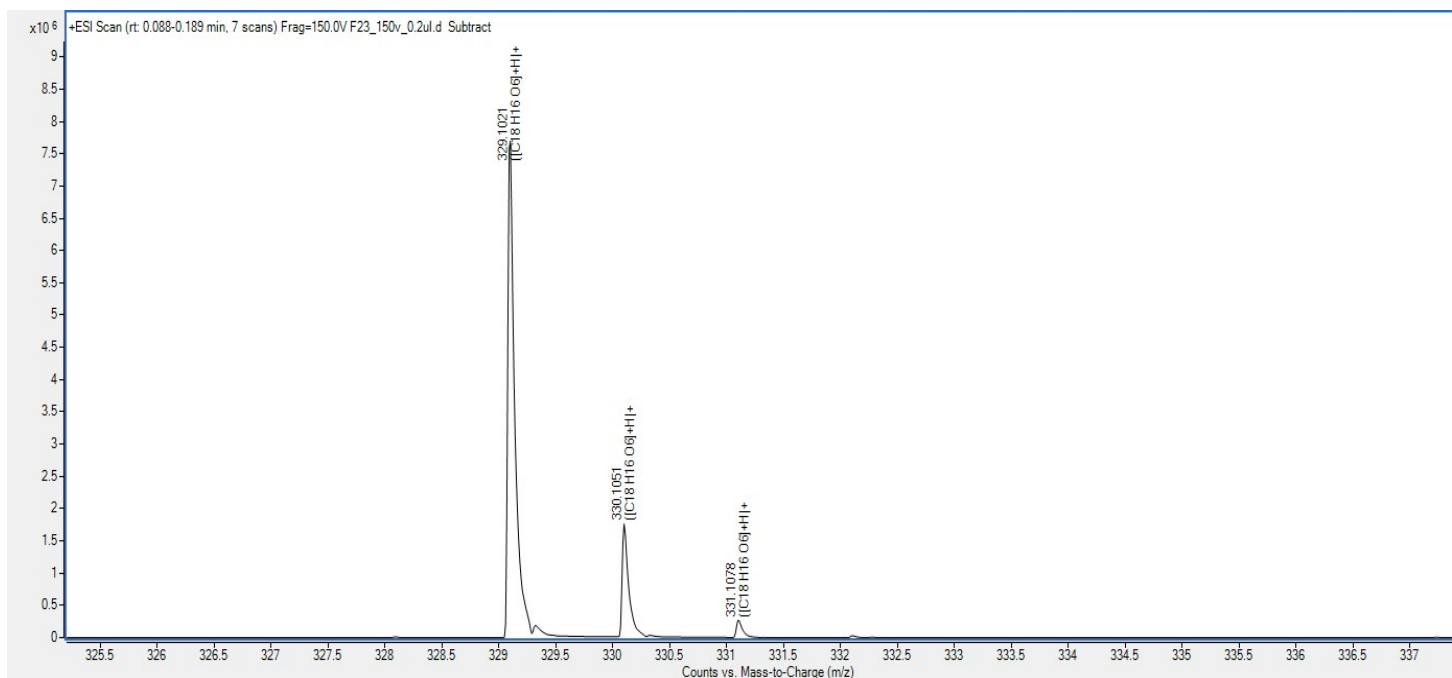

Species, Calc m/z

M<sup>+</sup>, 328.0941

(M+H)<sup>+</sup>, 329.102

(M+Na)<sup>+</sup>, 351.0839

(M+K)<sup>+</sup>, 367.0578

| Formula                                        | Species            | m/z      | Score | Diff (abs. ppm) | Mass     |
|------------------------------------------------|--------------------|----------|-------|-----------------|----------|
| C <sub>18</sub> H <sub>16</sub> O <sub>6</sub> | (M+H) <sup>+</sup> | 329.1021 | 98.18 | 0.29            | 328.0947 |

7-Chloro-3-hydroxy-2-(2,4,5-trimethoxyphenyl)-4H-chromen-4-one (F24):  $^1\text{H-NMR}$  (400 MHz,  $\text{CDCl}_3$ ):

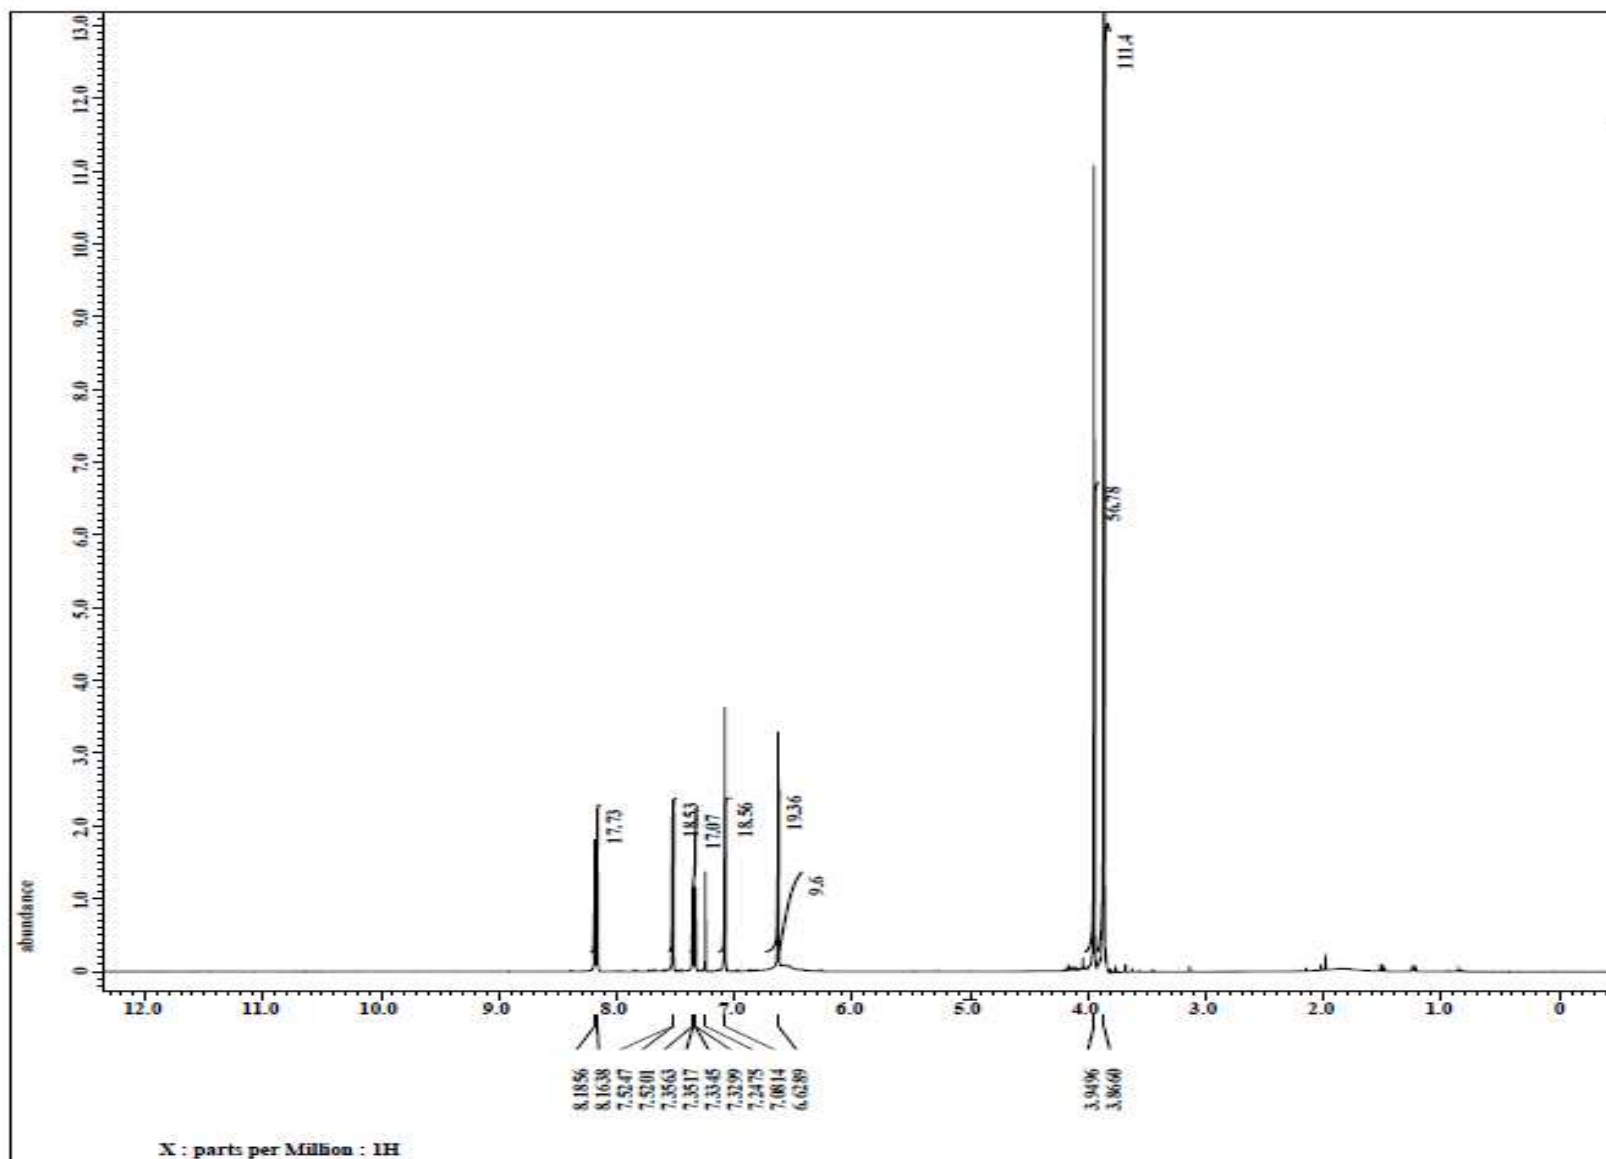

7-Chloro-3-hydroxy-2-(2,4,5-trimethoxyphenyl)-4H-chromen-4-one (F24):  $^{13}\text{C}$ -NMR (100 MHz;  $\text{CDCl}_3$ )

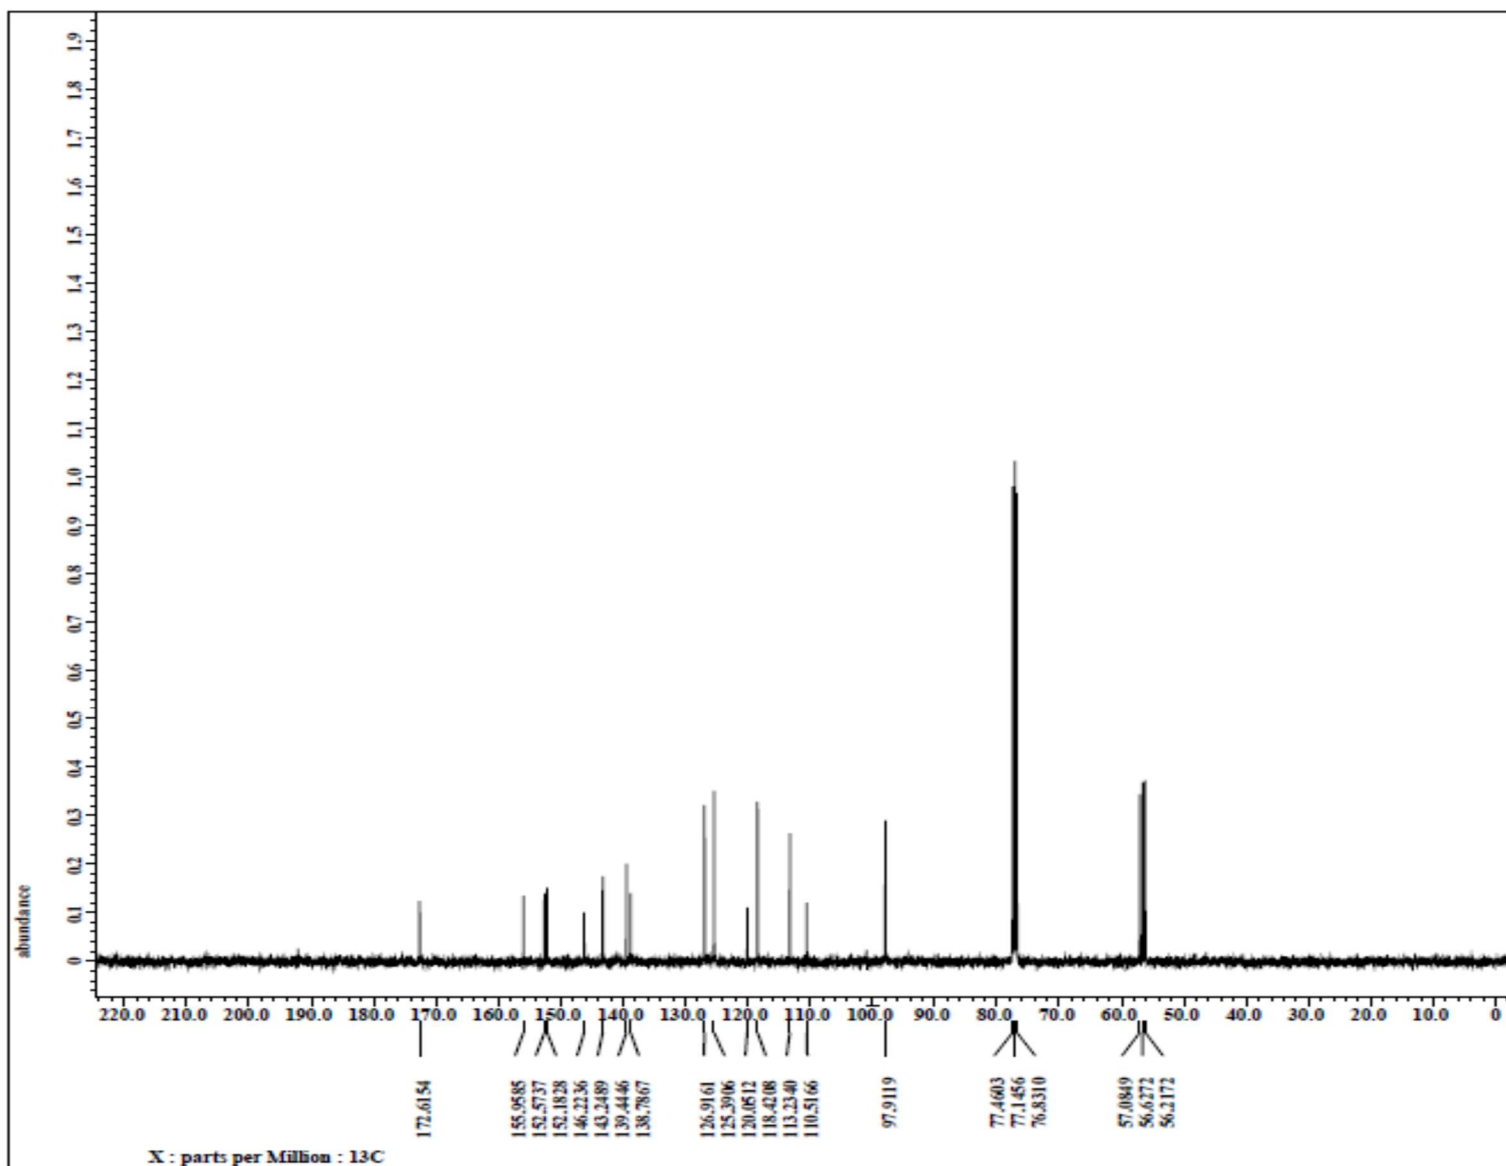

### 7-Chloro-3-hydroxy-2-(2,4,5-trimethoxyphenyl)-4H-chromen-4-one (F24): HRMS (ESI)

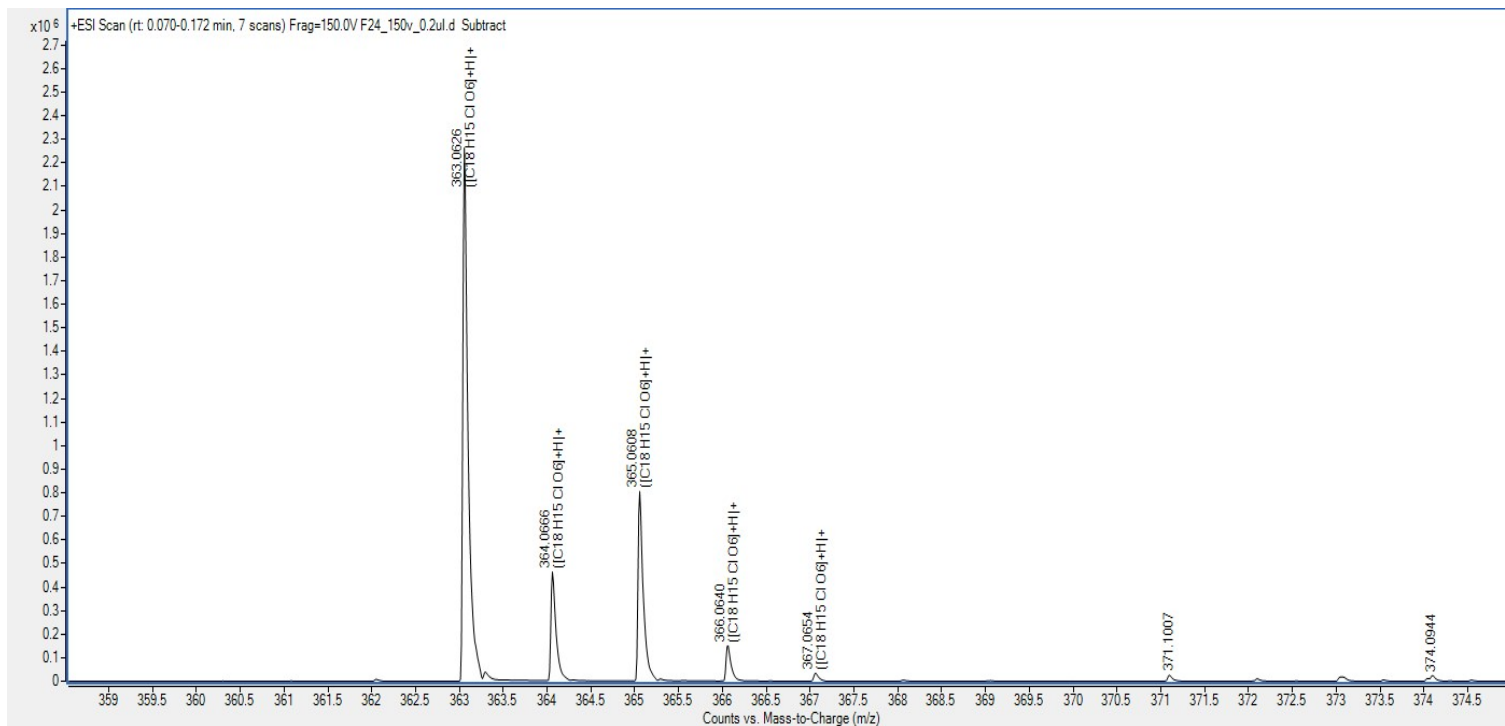

| Species, | Calc m/z | Formula,       | Species,       | m/z,             | Score, | Diff (abs. ppm), | Mass     |
|----------|----------|----------------|----------------|------------------|--------|------------------|----------|
| M+,      | 362.0552 |                |                |                  |        |                  |          |
| (M+H)+,  | 363.063  |                |                |                  |        |                  |          |
| (M+Na)+, | 385.0449 | C18 H15 Cl O6, | <b>(M+H)+,</b> | <b>363.0626,</b> | 99.26, | 0.66,            | 362.0557 |
| (M+K)+,  | 401.0189 |                |                |                  |        |                  |          |
